# Supplementary material for: Anion recognition using enhanced halogen bonding through intramolecular hydrogen bonds – a computational insight
Source: Royal Society of Chemistry journal article supplement (doi:10.1039/d2nj05969j), 2023-01-01
Supplement: d2nj05969j3.pdf [file d2nj05969j3.pdf]

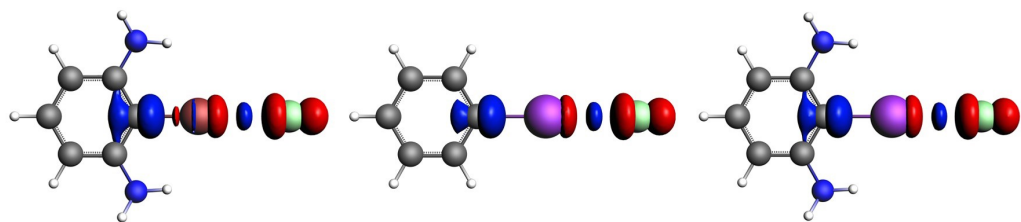

$\Delta\rho^{\downarrow}$   
**1b**...Cl<sup>-</sup>

$\Delta\rho^{\downarrow}$   
**1c**...Cl<sup>-</sup>

$\Delta\rho^{\downarrow}$   
**1c**...Cl<sup>-</sup>

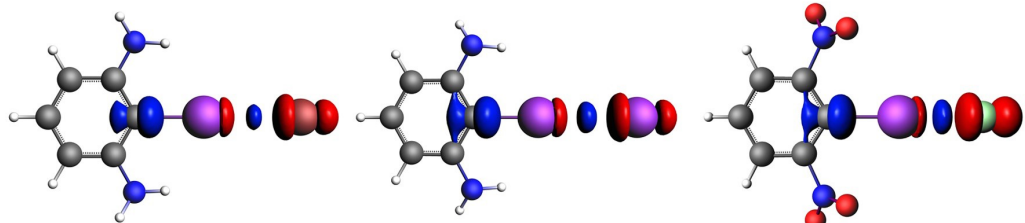

$\Delta\rho^{\downarrow}$   
**1c**...Br<sup>-</sup>

$\Delta\rho^{\downarrow}$   
**1c**...I<sup>-</sup>

$\Delta\rho^{\phi}$   
**1d**...Cl<sup>-</sup>

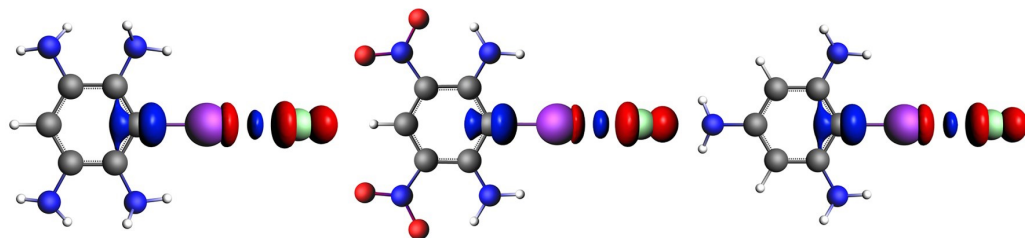

$\Delta\rho^{\downarrow}$   
**1e**...Cl<sup>-</sup>

$\Delta\rho^{\phi}$   
**1f**...Cl<sup>-</sup>

$\Delta\rho^{\downarrow}$   
**1g**...Cl<sup>-</sup>

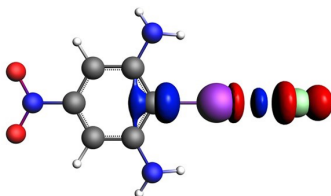

$\Delta\rho^{\downarrow}$   
**1h**...Cl<sup>-</sup>
