# Supplementary material for: Anion recognition using enhanced halogen bonding through intramolecular hydrogen bonds – a computational insight
Source: Royal Society of Chemistry journal article supplement (doi:10.1039/d2nj05969j), 2023-01-01
Supplement: d2nj05969j4.pdf [file d2nj05969j4.pdf]

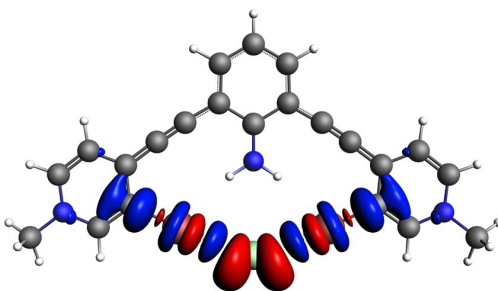

$\Delta\rho_1$   
**2b...Cl<sup>-</sup>**

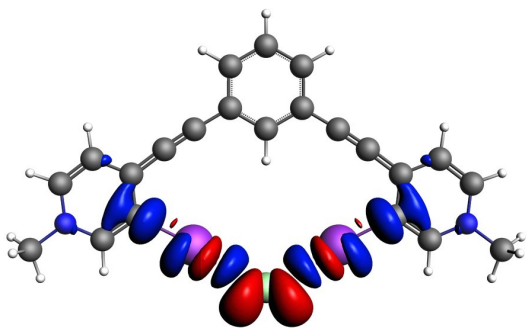

$\Delta\rho_1$

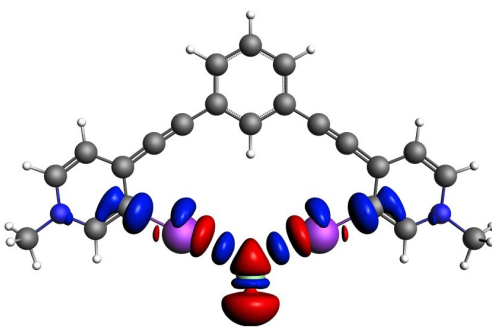

$\Delta\rho_2$

**2...Cl<sup>-</sup>**

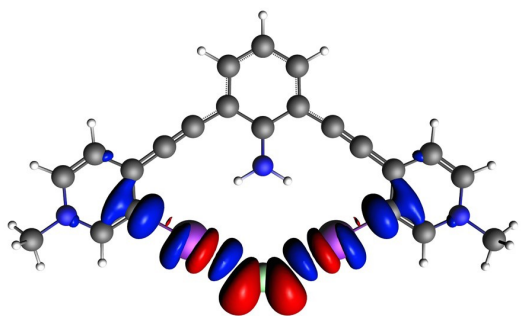

$\Delta\rho_1$

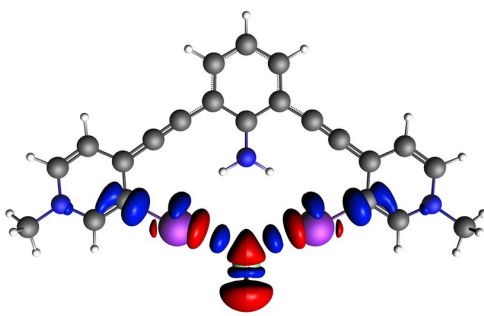

$\Delta\rho_2$

**2c...Cl<sup>-</sup>**

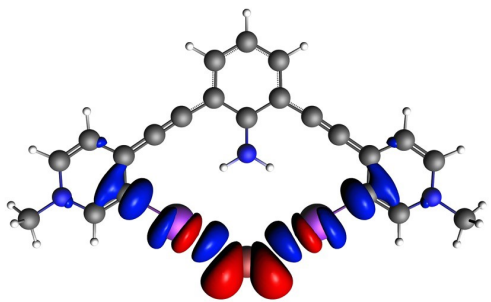

$\Delta\rho_1$

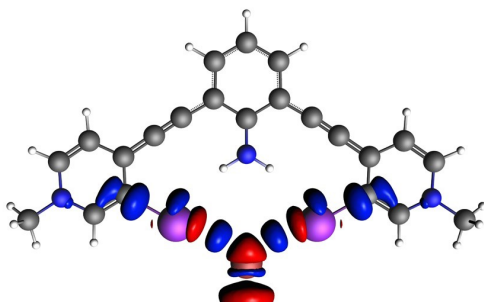

$\Delta\rho_2$

**2c...Br<sup>-</sup>**
