# Supplementary material for: Anion recognition using enhanced halogen bonding through intramolecular hydrogen bonds – a computational insight
Source: Royal Society of Chemistry journal article supplement (doi:10.1039/d2nj05969j), 2023-01-01
Supplement: d2nj05969j5.pdf [file d2nj05969j5.pdf]

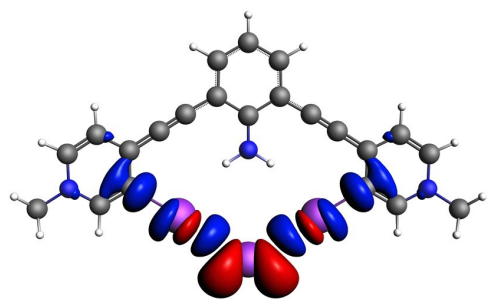

$\Delta\rho_1$

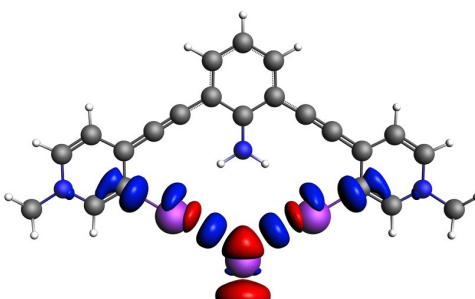

$\Delta\rho_2$

**2c**...I<sup>-</sup>

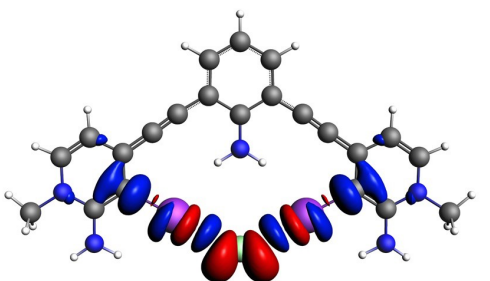

$\Delta\rho_1$

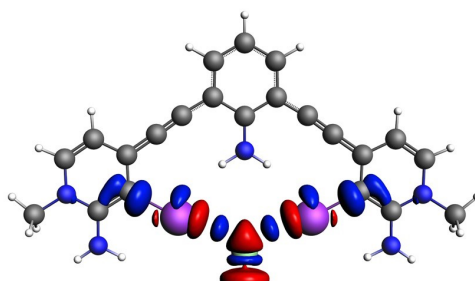

$\Delta\rho_2$

**2d**...Cl<sup>-</sup>

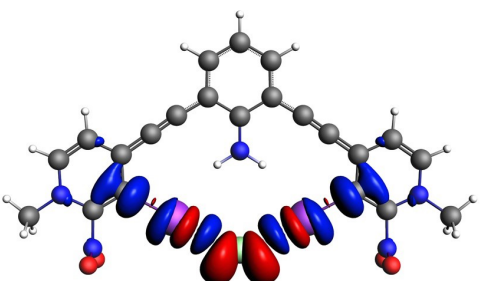

$\Delta\rho_1$

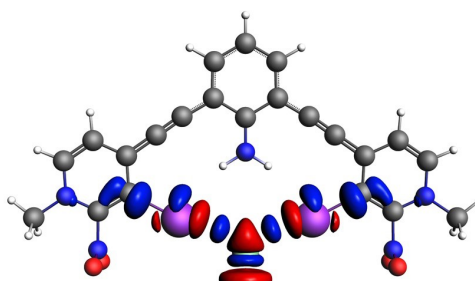

$\Delta\rho_2$

**2e**...Cl<sup>-</sup>

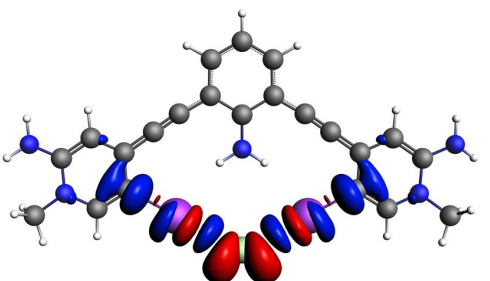

$\Delta\rho_1$

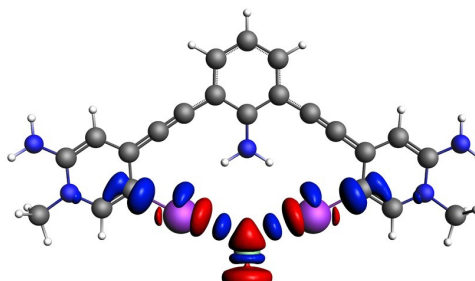

$\Delta\rho_2$

**2f**...Cl<sup>-</sup>
