# Supplementary material for: Anion recognition using enhanced halogen bonding through intramolecular hydrogen bonds – a computational insight
Source: Royal Society of Chemistry journal article supplement (doi:10.1039/d2nj05969j), 2023-01-01
Supplement: d2nj05969j11.pdf [file d2nj05969j11.pdf]

# Anion Recognition using Enhanced Halogen Bonding through Intramolecular Hydrogen Bonds – A Computational Insight

Renato Pereira Orenha,<sup>\*a,b</sup> Saulo Samuel Pereira Furtado,<sup>b</sup> Giovanni Finoto Caramori,<sup>\*a</sup> Maurício Jeomar Piotrowski,<sup>c</sup> Alvaro Muñoz–Castro,<sup>d</sup> and Renato Luis Tame Parreira<sup>\*b</sup>

<sup>a</sup> Departamento de Química, Universidade Federal de Santa Catarina, Campus Universitário Trindade, CP 476, Florianópolis, SC, 88040–900, Brazil. E–mail: rpo9@hotmail.com / giovanni.caramori@ufsc.br

<sup>b</sup> Núcleo de Pesquisas em Ciências Exatas e Tecnológicas, Universidade de Franca, Franca, SP, Brazil. E–mail: renato.parreira@unifran.edu.br

<sup>c</sup> Department of Physics, Federal University of Pelotas, Pelotas, RS, 96010–900, Brazil.

<sup>d</sup> Facultad de Ingeniería, Arquitectura y Diseño, Universidad San Sebastián, Bellavista 7, Santiago, 8420524, Chile.

## Supplementary Material

### Summary

|                                                                                                                                                                                                                                                                                                                                                                                                                                                                         | Page |
|-------------------------------------------------------------------------------------------------------------------------------------------------------------------------------------------------------------------------------------------------------------------------------------------------------------------------------------------------------------------------------------------------------------------------------------------------------------------------|------|
| <b>Table S1.</b> Analysis of the bond situation between the receptors ( <b>1d–h</b> and <b>2d–m</b> ) and anions (Cl <sup>−</sup> ) through of the EDA–NOCV methodology. The energy unit is kcal mol <sup>−1</sup> . <sup>[a,b]</sup>                                                                                                                                                                                                                                   | 3    |
| <b>Figure S1.</b> Electrostatic potential surfaces mapped to an electronic density of 0.050 a.u.: i) [0.100 a.u. (red) to 0.250 a.u. (blue)] for <b>1</b> ( <sub>–</sub> or <sub>b</sub> ) receptor; ii) [0.100 a.u. (red) to 0.350 a.u. (blue)] for <b>1</b> ( <sub>c–h</sub> ) receptors; and iii) [0.300 a.u. (red) to 0.500 a.u. (blue)] for <b>2</b> ( <sub>–</sub> or <sub>b–m</sub> ) receptors.                                                                 | 4    |
| <b>Figure S2.</b> The first density deformation channel surface plots, $\Delta\rho_1$ , with isovalues = $\int$ 0.003, $\int$ and $\phi$ 0.005 a.u., where the red and blue regions indicate the electronic density outflow and inflow, respectively, for the <b>1</b> ( <sub>–</sub> or <sub>b–h</sub> )⋯(Cl <sup>−</sup> , Br <sup>−</sup> or I <sup>−</sup> ) complexes. Color code for atoms: H = white; C = gray; N = blue; Cl = green; Br = wine; and I = purple. | 5    |
| <b>Figure S3.</b> The first two density deformation channel surface plots, $\Delta\rho_{1,2}$ , with isovalue = 0.001 a.u., where the red and blue regions indicate the electronic density outflow and inflow, respectively, for the <b>2</b> ( <sub>–</sub> , <sub>b</sub> or <sub>c</sub> )⋯(Cl <sup>−</sup> or Br <sup>−</sup> ) complexes. Color code for atoms: H = white; C = gray; N = blue; Cl = green; and Br = wine.                                          | 6    |
| <b>Figure S4.</b> The first two density deformation channel surface plots, $\Delta\rho_{1,2}$ , with isovalue = 0.001 a.u., where the red and blue regions indicate the electronic density outflow and inflow, respectively, for the <b>2c</b> ⋯I <sup>−</sup> and <b>2(d–f)</b> ⋯Cl <sup>−</sup> complexes. Color code for atoms: H = white; C = gray; N = blue; O = red; Cl = green; and I = purple.                                                                  | 7    |
| <b>Figure S5.</b> The first two density deformation channel surface plots, $\Delta\rho_{1,2}$ , with isovalue = 0.001 a.u., where the red and blue regions indicate the electronic density outflow and inflow, respectively, for the <b>2(g–j)</b> ⋯Cl <sup>−</sup> complexes. Color code for atoms: H = white; C = gray; N = blue; O = red; Cl = green; and I = purple.                                                                                                | 8    |

|                                                                                                                                                                                                                                                                                                                                                                                 |    |
|---------------------------------------------------------------------------------------------------------------------------------------------------------------------------------------------------------------------------------------------------------------------------------------------------------------------------------------------------------------------------------|----|
| <b>Figure S6.</b> The first two density deformation channel surface plots, $\Delta\rho_{1,2}$ , with isovalue = 0.001 a.u., where the red and blue regions indicate the electronic density outflow and inflow, respectively, for the <b>2</b> (l and m)····Cl <sup>-</sup> complexes. Color code for atoms: H = white; C = gray; N = blue; O = red; Cl = green; and I = purple. | 9  |
| <b>Figure S7.</b> Topological map containing the bond paths (continuous or dashed lines connecting the cores) and bond critical points (small light green points), for the <b>1</b> (_ or a-h)····(Cl <sup>-</sup> , Br <sup>-</sup> or I <sup>-</sup> ) complexes. Color code for atoms: H = white; C = gray; N = blue; O = red; Cl = green; Br = brown; and I = purple.       | 10 |
| <b>Figure S8.</b> Topological map containing the bond paths (continuous or dashed lines connecting the cores) and bond critical points (small light green points), for the <b>2</b> (_ or a-e)····(Cl <sup>-</sup> , Br <sup>-</sup> or I <sup>-</sup> ) complexes. Color code for atoms: H = white; C = gray; N = blue; O = red; Cl = green; Br = brown; and I = purple.       | 11 |
| <b>Figure S9.</b> Topological map containing the bond paths (continuous or dashed lines connecting the cores) and bond critical points (small light green points), for the <b>2</b> (f-m)····Cl <sup>-</sup> complexes. Color code for atoms: H = white; C = gray; N = blue; O = red; Cl = green; and I = purple.                                                               | 12 |
| <b>Table S2.</b> Ratio between the kinetic energy density, $G_b$ , and the potential energy density, $V_b$ , $-G_b/V_b$ , and the electron density, $\rho_b$ , at BCPs related to the interactions present in <b>1</b> (_ or a-h)····(Cl <sup>-</sup> , Br <sup>-</sup> or I <sup>-</sup> ) complexes. The values of all parameters are in a.u.                                 | 13 |
| <b>Table S3.</b> Ratio between the kinetic energy density, $G_b$ , and the potential energy density, $V_b$ , $-G_b/V_b$ , and the electron density, $\rho_b$ , at BCPs related to the interactions present in <b>2</b> (_ or a-c)····(Cl <sup>-</sup> , Br <sup>-</sup> or I <sup>-</sup> ) complexes. The values of all parameters are in a.u.                                 | 14 |
| <b>Table S4.</b> Ratio between the kinetic energy density, $G_b$ , and the potential energy density, $V_b$ , $-G_b/V_b$ , and the electron density, $\rho_b$ , at BCPs related to the interactions present in <b>2</b> (d-m)····Cl <sup>-</sup> complexes. The values of all parameters are in a.u.                                                                             | 15 |
| <b>Table S5.</b> Optimized Cartesian coordinates for the compounds investigated in this study using the BLYP-D3(BJ)/Def2-TZVP computational model.                                                                                                                                                                                                                              | 16 |

**Table S1.** Analysis of the bond situation between the receptors (**1d–h** and **2d–m**) and anions (Cl<sup>-</sup>) through the EDA–NOCV methodology. The energy unit is kcal mol<sup>-1</sup>.<sup>[a,b]</sup>

| Complex                      | $\Delta E_{\text{int}}$ | $\Delta V_{\text{elstat}}$ | $\Delta E_{\text{Pauli}}$ | $\Delta E_{\text{oi}}$ | $\Delta E_{\text{disp}}$ | $\Delta E_{\text{oi},1}$ | $\Delta E_{\text{oi},2}$ |
|------------------------------|-------------------------|----------------------------|---------------------------|------------------------|--------------------------|--------------------------|--------------------------|
| <b>1d</b> ...Cl <sup>-</sup> | -37.78                  | -46.64 (48)                | 59.77                     | -48.51 (50)            | -2.39 (2)                | -37.46                   | -                        |
| <b>1e</b> ...Cl <sup>-</sup> | -22.75                  | -28.14 (45)                | 39.31                     | -31.62 (51)            | -2.30 (4)                | -23.16                   | -                        |
| <b>1f</b> ...Cl <sup>-</sup> | -40.33                  | -48.52 (53)                | 51.93                     | -41.37 (45)            | -2.37 (3)                | -31.13                   | -                        |
| <b>1g</b> ...Cl <sup>-</sup> | -20.92                  | -25.97 (44)                | 37.57                     | -30.23 (52)            | -2.28 (4)                | -22.15                   | -                        |
| <b>1h</b> ...Cl <sup>-</sup> | -32.38                  | -39.22 (50)                | 45.38                     | -36.21 (47)            | -2.33 (3)                | -25.76                   | -                        |
| <b>2d</b> ...Cl <sup>-</sup> | -156.01                 | -167.99 (72)               | 77.89                     | -60.57 (26)            | -5.35 (2)                | -32.14                   | -13.63                   |
| <b>2e</b> ...Cl <sup>-</sup> | -165.72                 | -179.11 (71)               | 87.96                     | -69.08 (27)            | -5.48 (2)                | -37.58                   | -15.42                   |
| <b>2f</b> ...Cl <sup>-</sup> | -148.82                 | -161.15 (71)               | 79.63                     | -62.05 (27)            | -5.25 (2)                | -32.88                   | -14.35                   |
| <b>2g</b> ...Cl <sup>-</sup> | -166.34                 | -178.52 (72)               | 83.05                     | -65.57 (26)            | -5.30 (2)                | -33.97                   | -14.30                   |
| <b>2h</b> ...Cl <sup>-</sup> | -151.63                 | -164.29 (71)               | 80.60                     | -62.72 (27)            | -5.22 (2)                | -32.75                   | -14.52                   |
| <b>2i</b> ...Cl <sup>-</sup> | -165.80                 | -177.25 (72)               | 81.20                     | -64.30 (26)            | -5.45 (2)                | -34.66                   | -13.89                   |
| <b>2j</b> ...Cl <sup>-</sup> | -150.68                 | -163.35 (71)               | 79.73                     | -61.78 (27)            | -5.28 (2)                | -32.65                   | -13.97                   |
| <b>2k</b> ...Cl <sup>-</sup> | -163.04                 | -176.88 (71)               | 84.85                     | -65.85 (27)            | -5.15 (2)                | -34.08                   | -15.78                   |
| <b>2l</b> ...Cl <sup>-</sup> | -154.13                 | -166.87 (71)               | 80.70                     | -62.70 (27)            | -5.25 (2)                | -33.01                   | -14.42                   |
| <b>2m</b> ...Cl <sup>-</sup> | -161.85                 | -174.71 (72)               | 82.06                     | -63.91 (26)            | -5.29 (2)                | -33.92                   | -14.31                   |

<sup>[a]</sup>  $\Delta E_{\text{int}} = \Delta V_{\text{elstat}} + \Delta E_{\text{Pauli}} + \Delta E_{\text{oi}} + \Delta E_{\text{disp}}$ ; <sup>[b]</sup> Values in parentheses correspond to the percentage of each stabilizing contribution:  $\Delta V_{\text{elstat}} (\%) + \Delta E_{\text{oi}} (\%) + \Delta E_{\text{disp}} (\%) = 100\%$ .

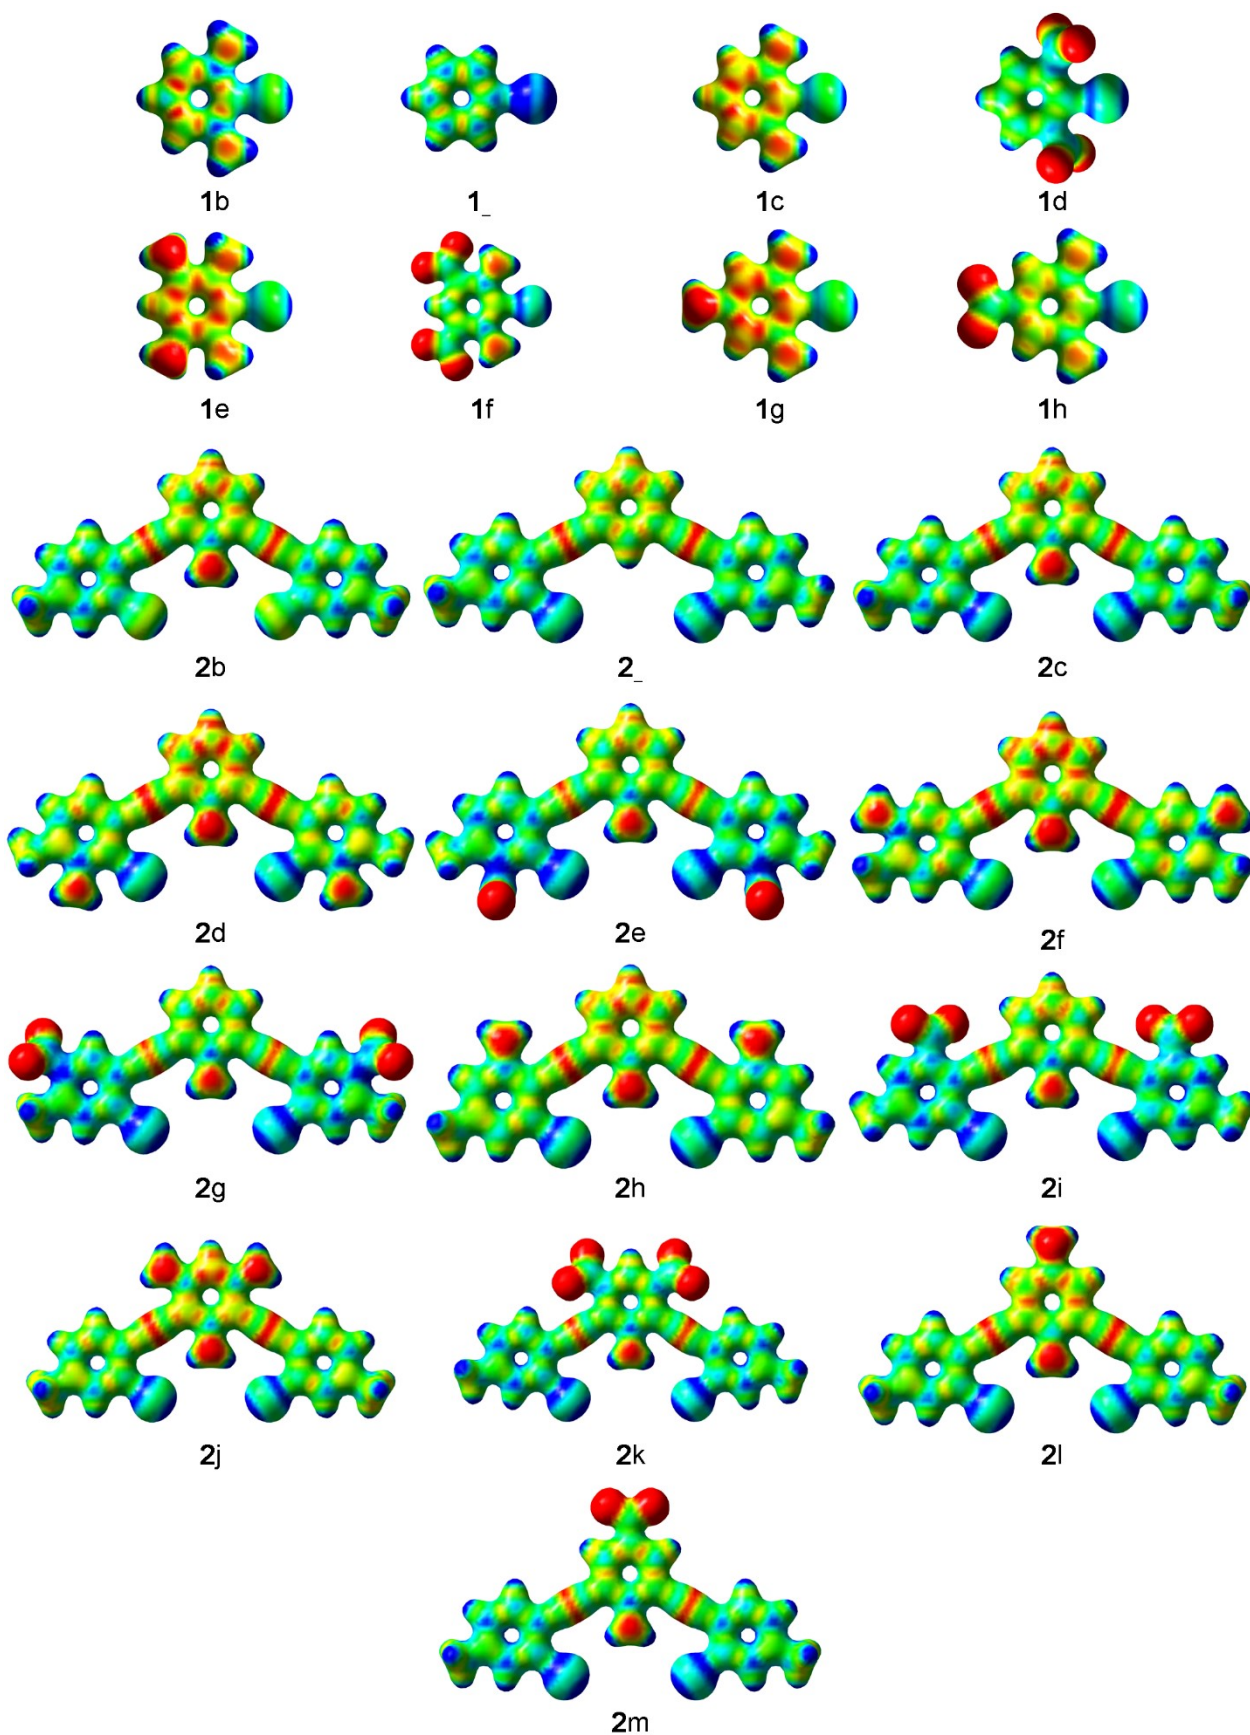

**Figure S1.** Electrostatic potential surfaces mapped to an electronic density of 0.050 a.u.: i) [0.100 a.u. (red) to 0.250 a.u. (blue)] for 1<sub>-</sub> or b receptor; ii) [0.100 a.u. (red) to 0.350 a.u. (blue)] for 1(c–h) receptors; and iii) [0.300 a.u. (red) to 0.500 a.u. (blue)] for 2<sub>-</sub> or b–m receptors.

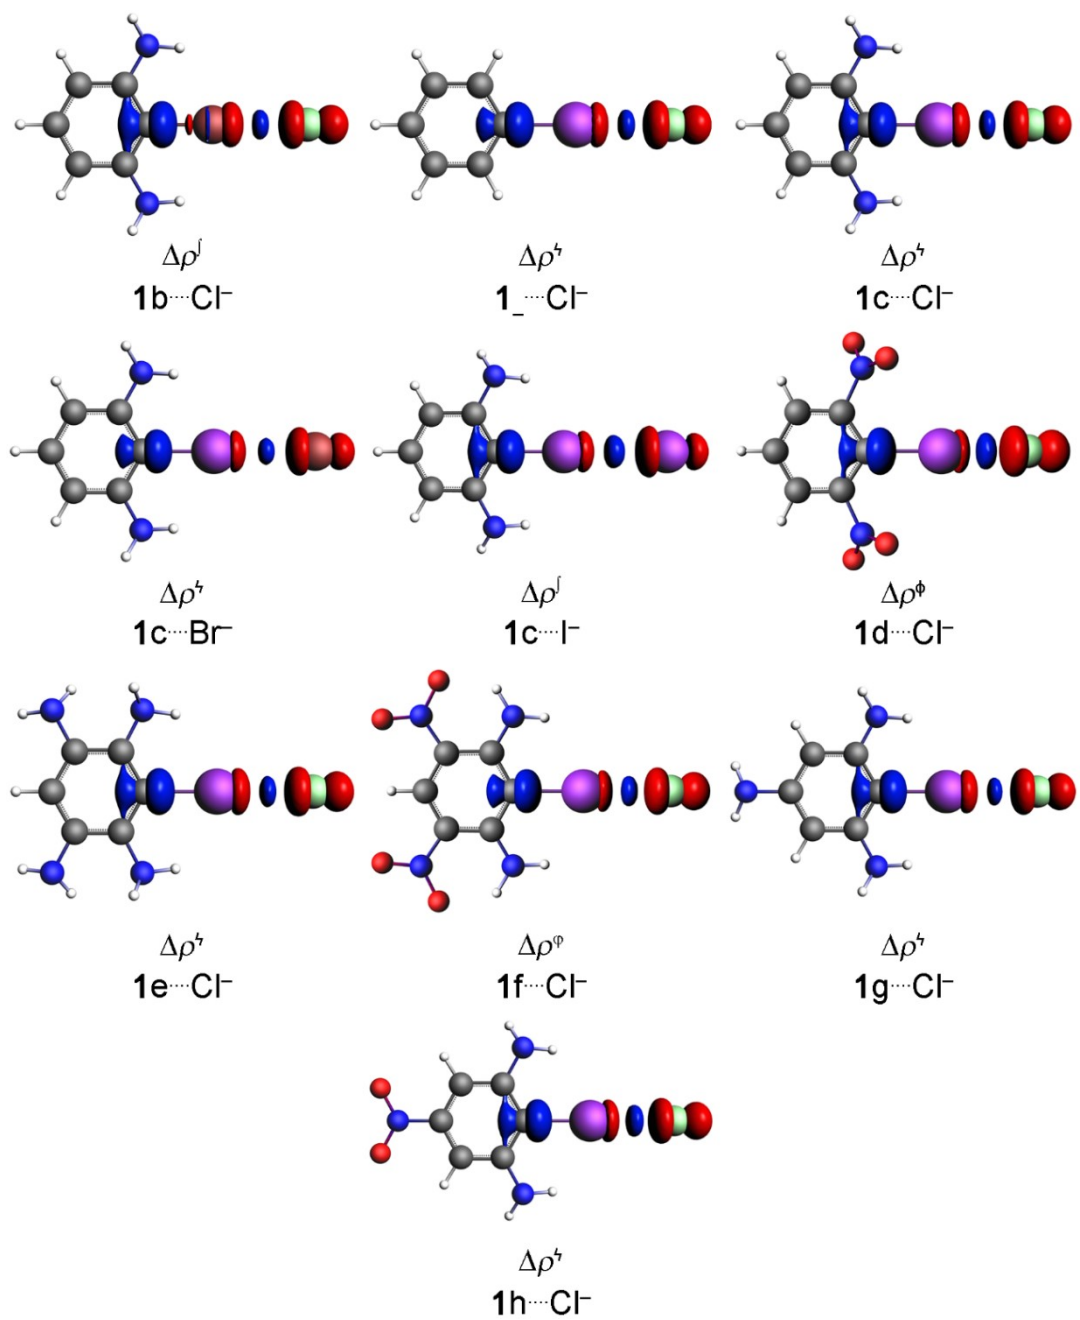

**Figure S2.** The first density deformation channel surface plots,  $\Delta\rho_1$ , with isovalues =  $\int 0.003$ ,  $\int$  = and  $\phi 0.005$  a.u., where the red and blue regions indicate the electronic density outflow and inflow, respectively, for the **1**(<sub>-</sub> or b-h)...(Cl<sup>-</sup>, Br<sup>-</sup> or I<sup>-</sup>) complexes. Color code for atoms: H = white; C = gray; N = blue; Cl = green; Br = wine; and I = purple.

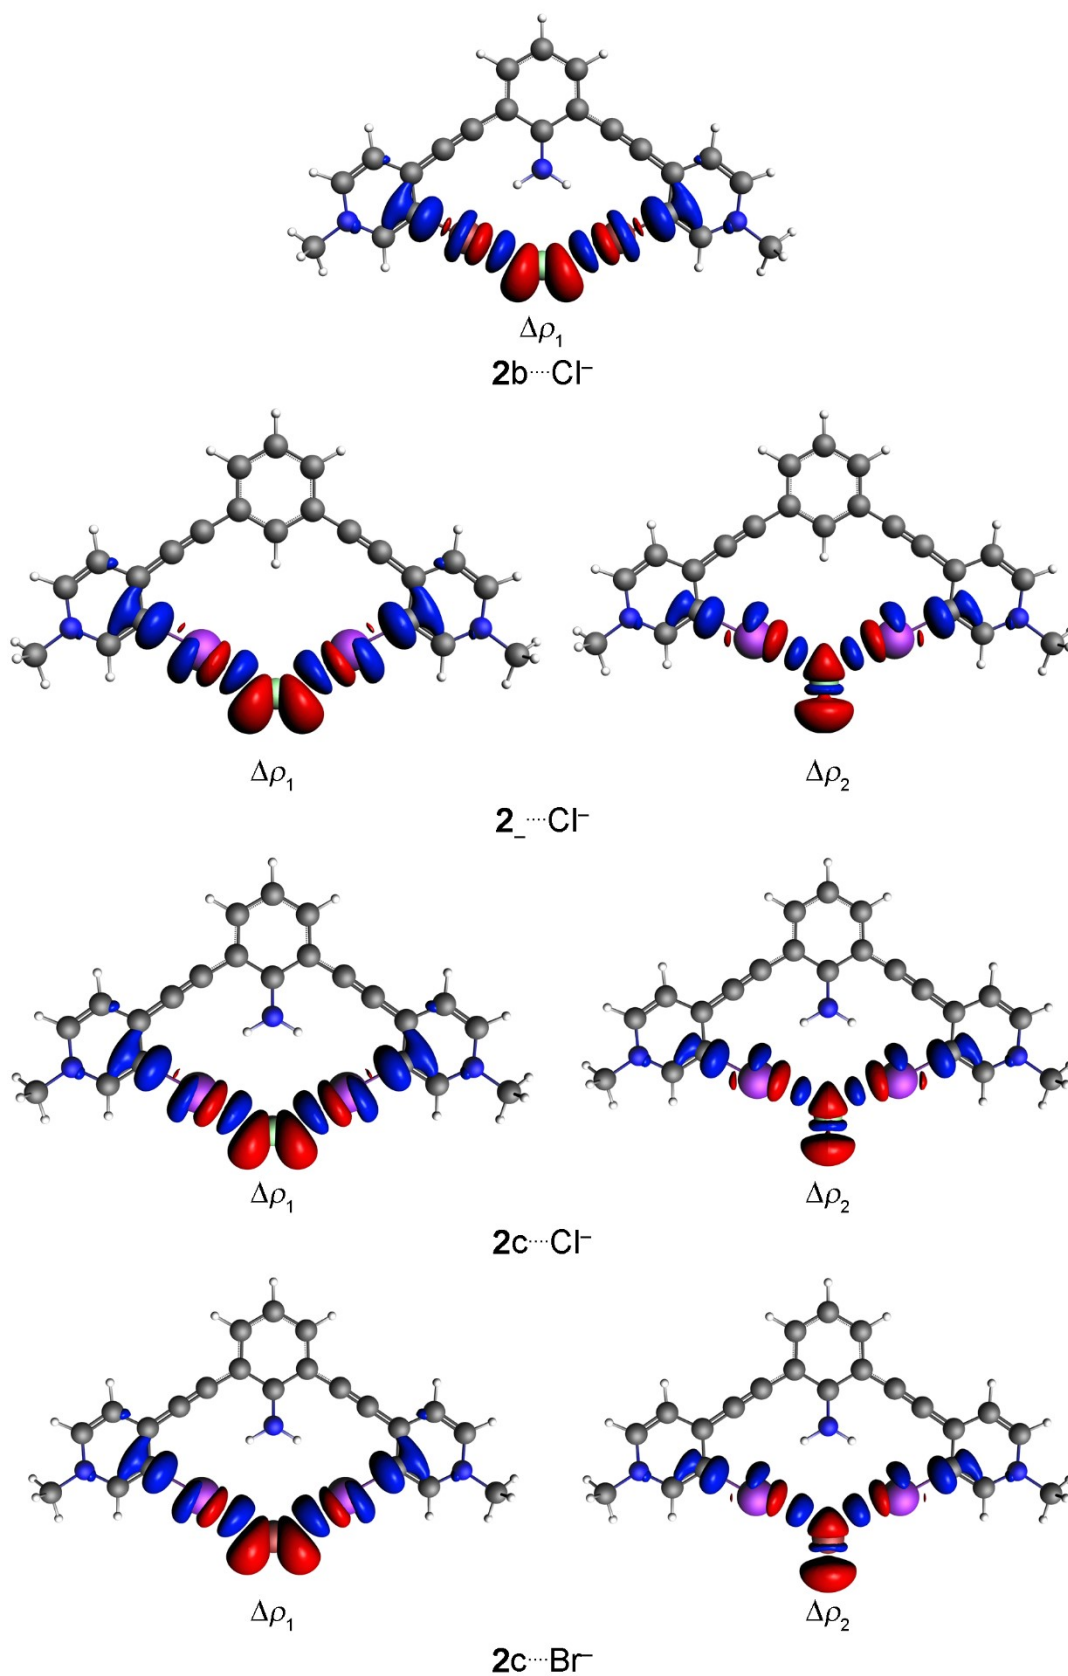

**Figure S3.** The first two density deformation channel surface plots,  $\Delta\rho_{1,2}$ , with isovalue = 0.001 a.u., where the red and blue regions indicate the electronic density outflow and inflow, respectively, for the  $2(-, b \text{ or } c) \cdots (Cl^- \text{ or } Br^-)$  complexes. Color code for atoms: H = white; C = gray; N = blue; Cl = green; and Br = wine.

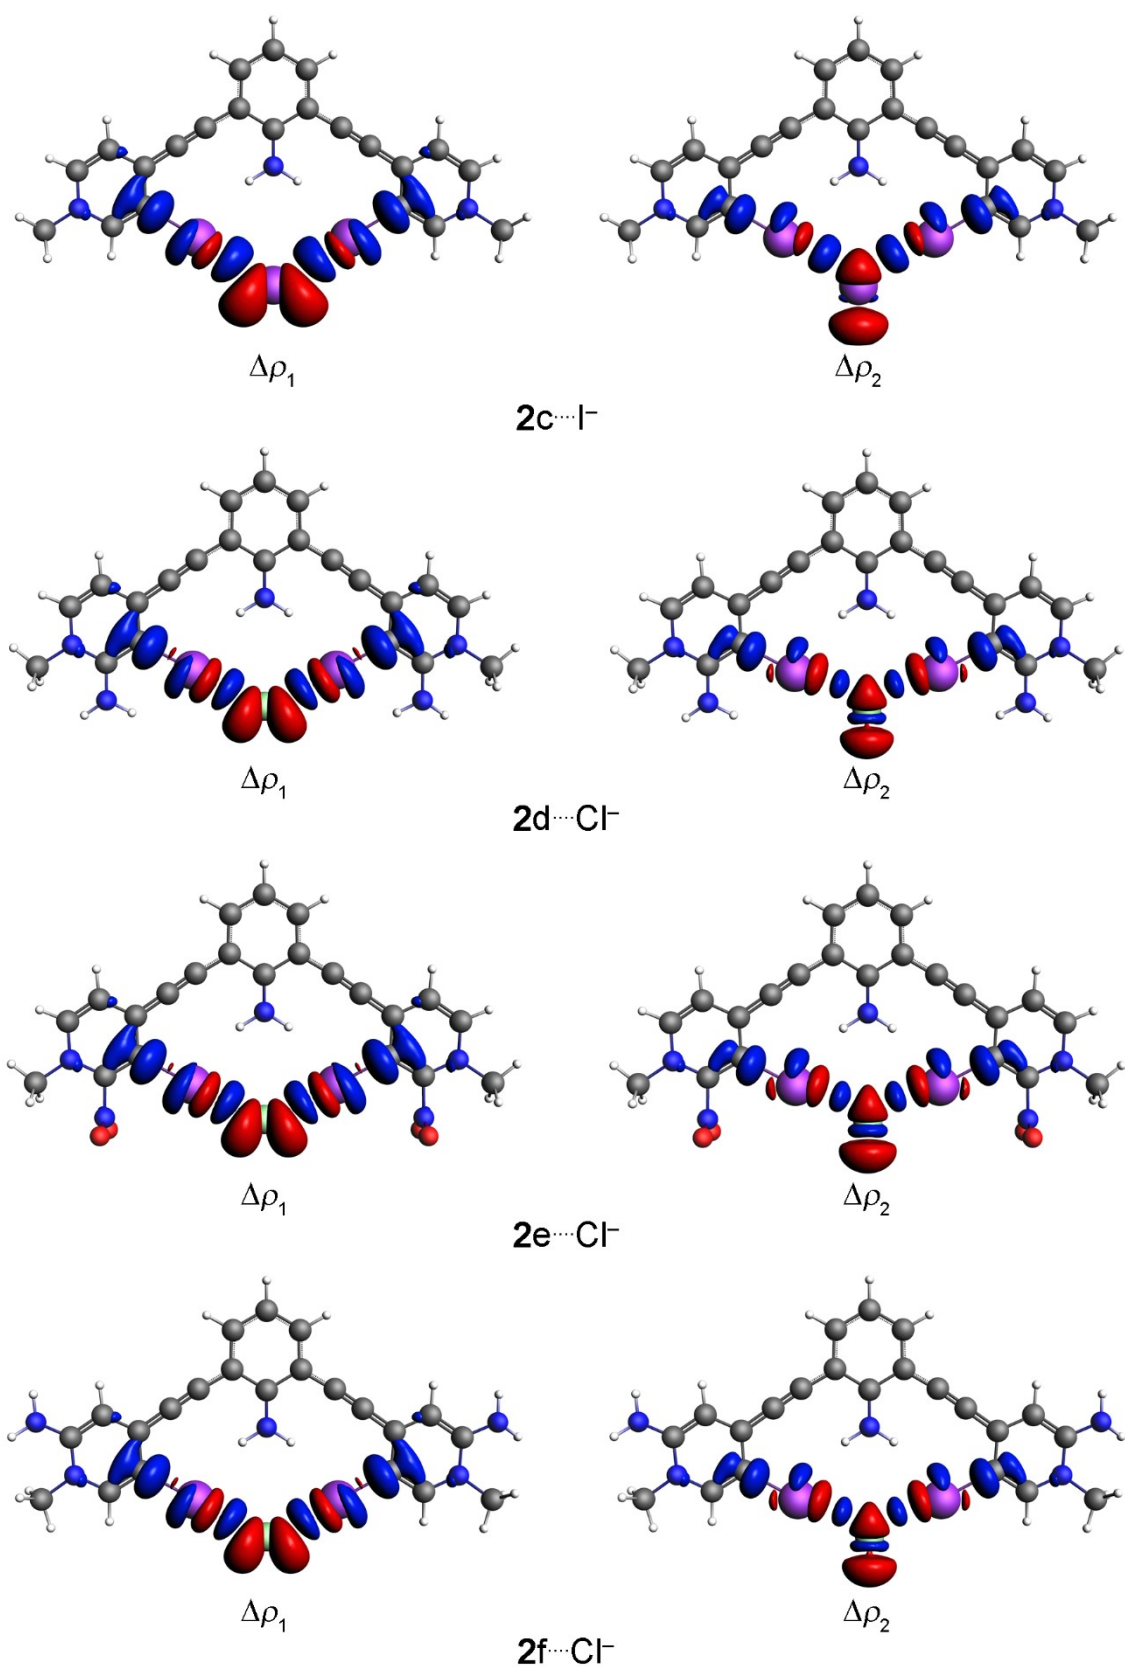

**Figure S4.** The first two density deformation channel surface plots,  $\Delta\rho_{1,2}$ , with isovalue = 0.001 a.u., where the red and blue regions indicate the electronic density outflow and inflow, respectively, for the **2c**...I<sup>-</sup> and **2(d-f)**...Cl<sup>-</sup> complexes. Color code for atoms: H = white; C = gray; N = blue; O = red; Cl = green; and I = purple.

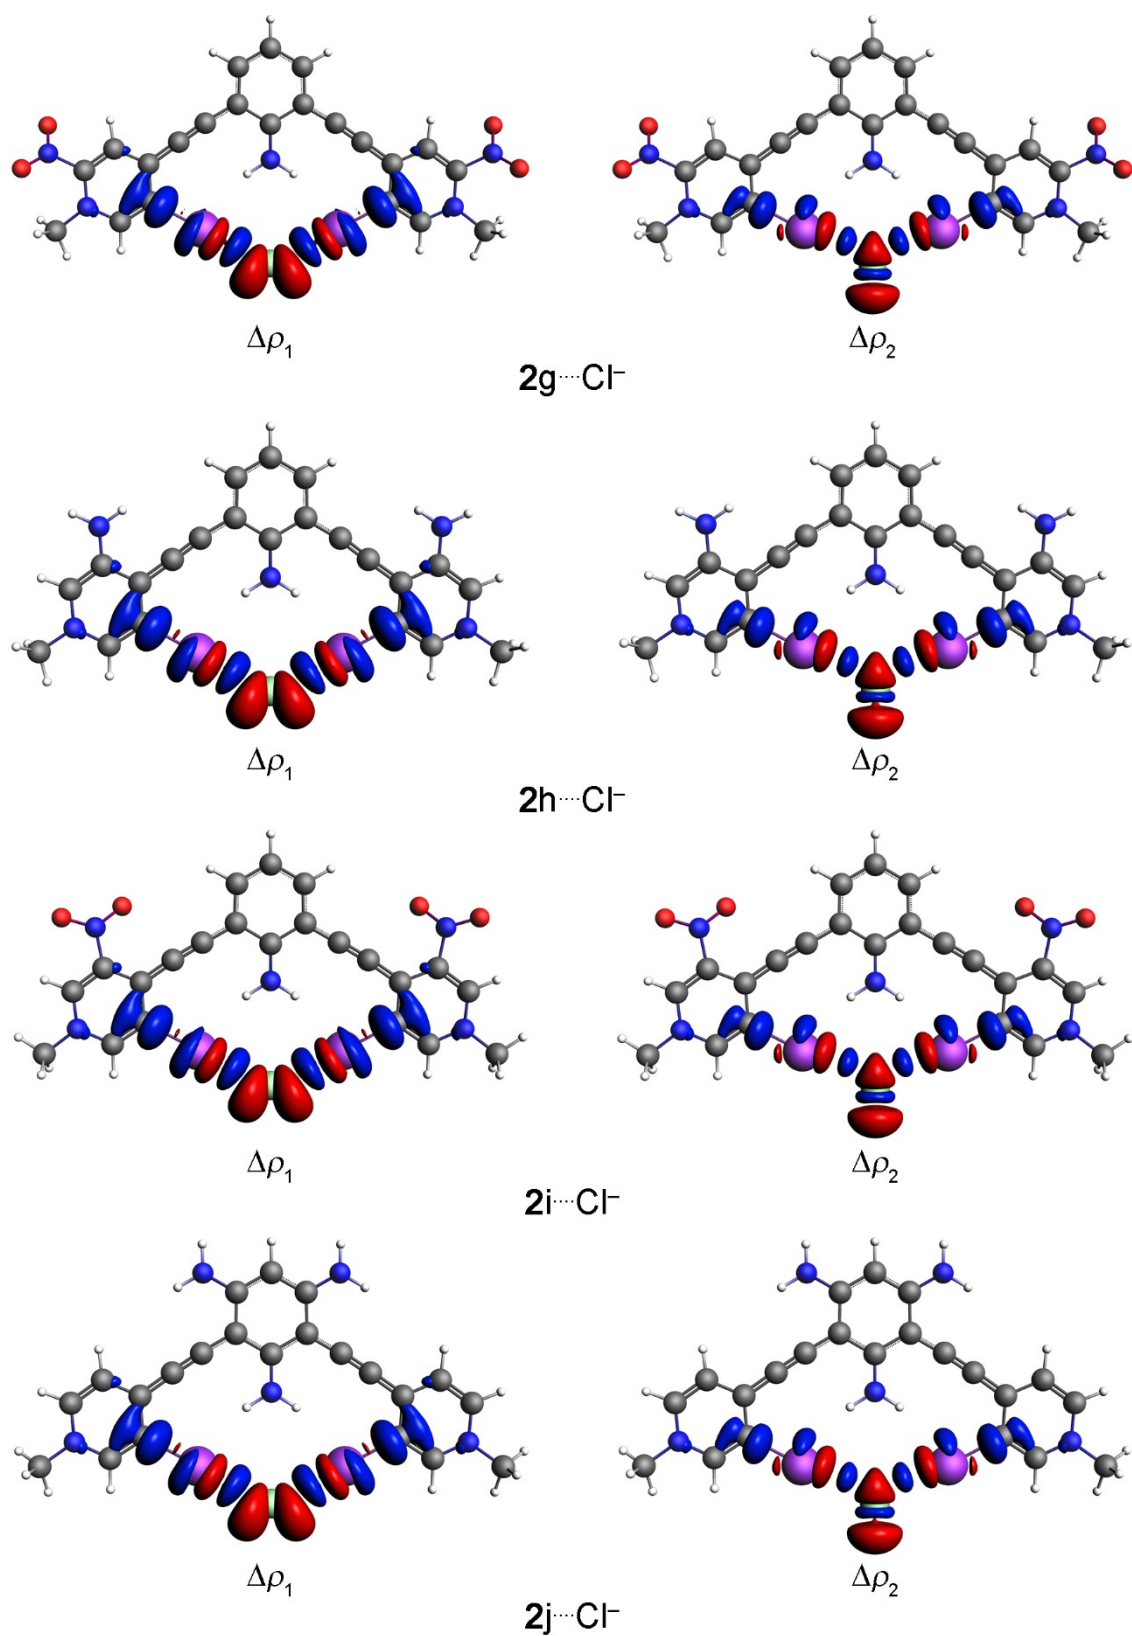

**Figure S5.** The first two density deformation channel surface plots,  $\Delta\rho_{1,2}$ , with isovalue = 0.001 a.u., where the red and blue regions indicate the electronic density outflow and inflow, respectively, for the **2(g-j)···Cl<sup>-</sup>** complexes. Color code for atoms: H = white; C = gray; N = blue; O = red; Cl = green; and I = purple.



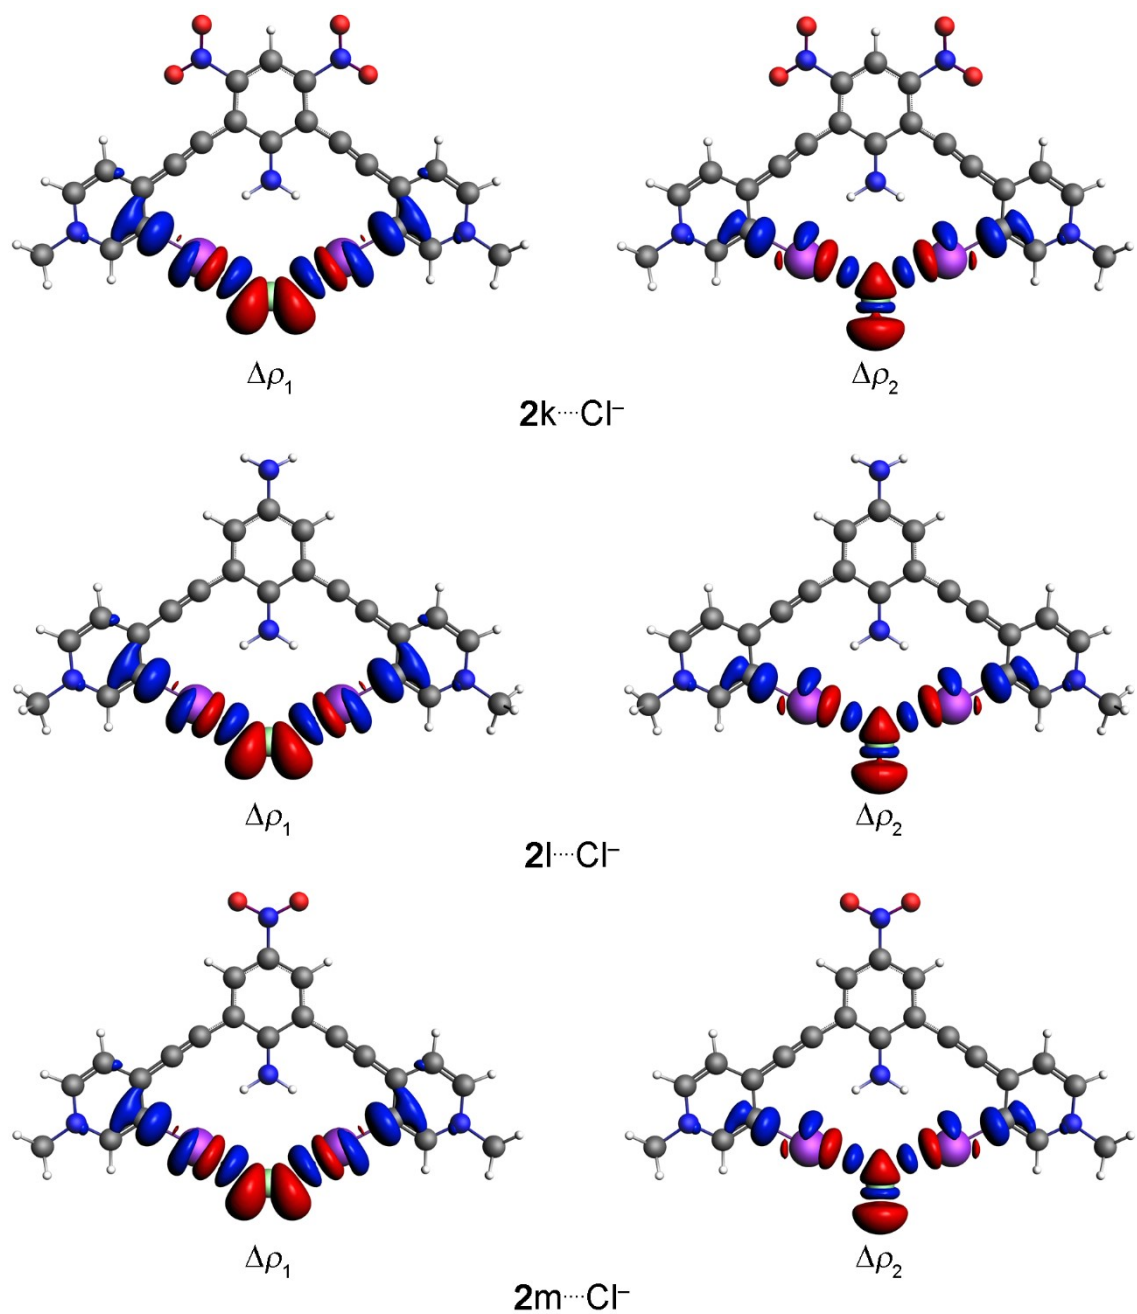

**Figure S6.** The first two density deformation channel surface plots,  $\Delta\rho_{1,2}$ , with isovalue = 0.001 a.u., where the red and blue regions indicate the electronic density outflow and inflow, respectively, for the **2(l and m)...**Cl<sup>-</sup> complexes. Color code for atoms: H = white; C = gray; N = blue; O = red; Cl = green; and I = purple.

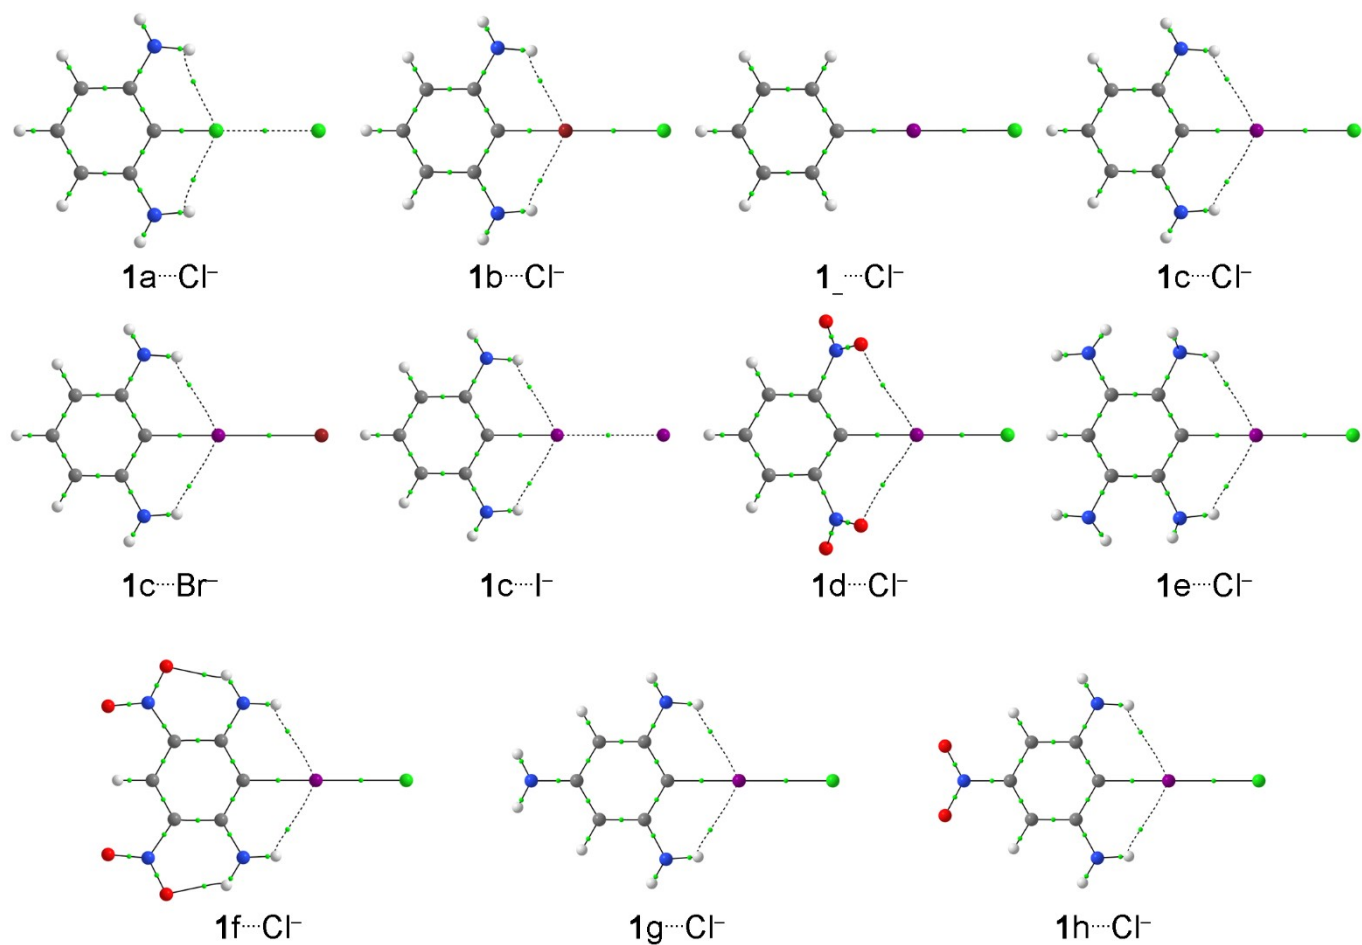

**Figure S7.** Topological map containing the bond paths (continuous or dashed lines connecting the cores) and bond critical points (small light green points), for the 1(\_ or a-h)...(Cl<sup>-</sup>, Br<sup>-</sup> or I<sup>-</sup>) complexes. Color code for atoms: H = white; C = gray; N = blue; O = red; Cl = green; Br = brown; and I = purple.

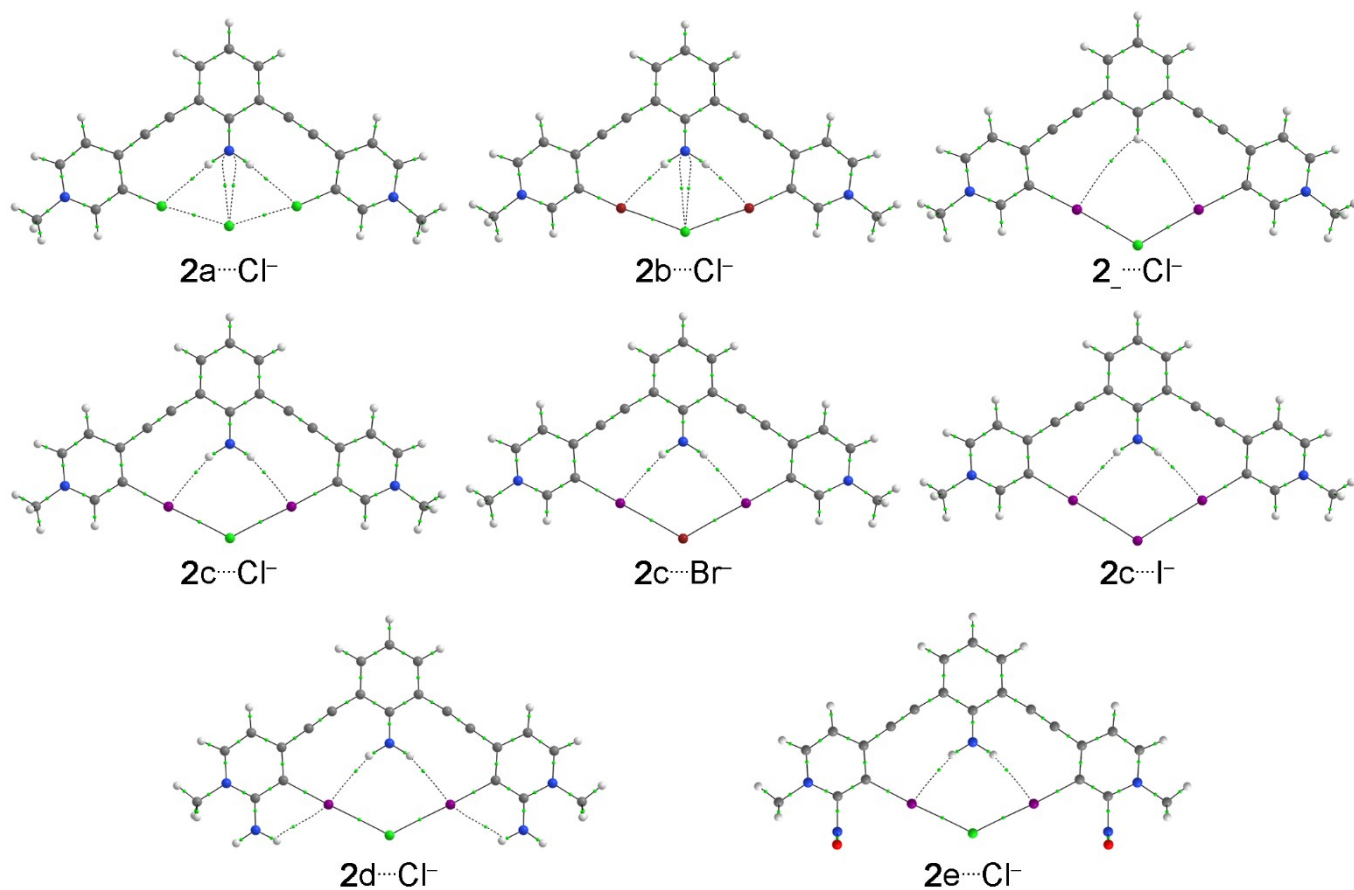

**Figure S8.** Topological map containing the bond paths (continuous or dashed lines connecting the cores) and bond critical points (small light green points), for the **2**(<sub>-</sub> or a-e)⋯(Cl<sup>-</sup>, Br<sup>-</sup> or I<sup>-</sup>) complexes. Color code for atoms: H = white; C = gray; N = blue; O = red; Cl = green; Br = brown; and I = purple.

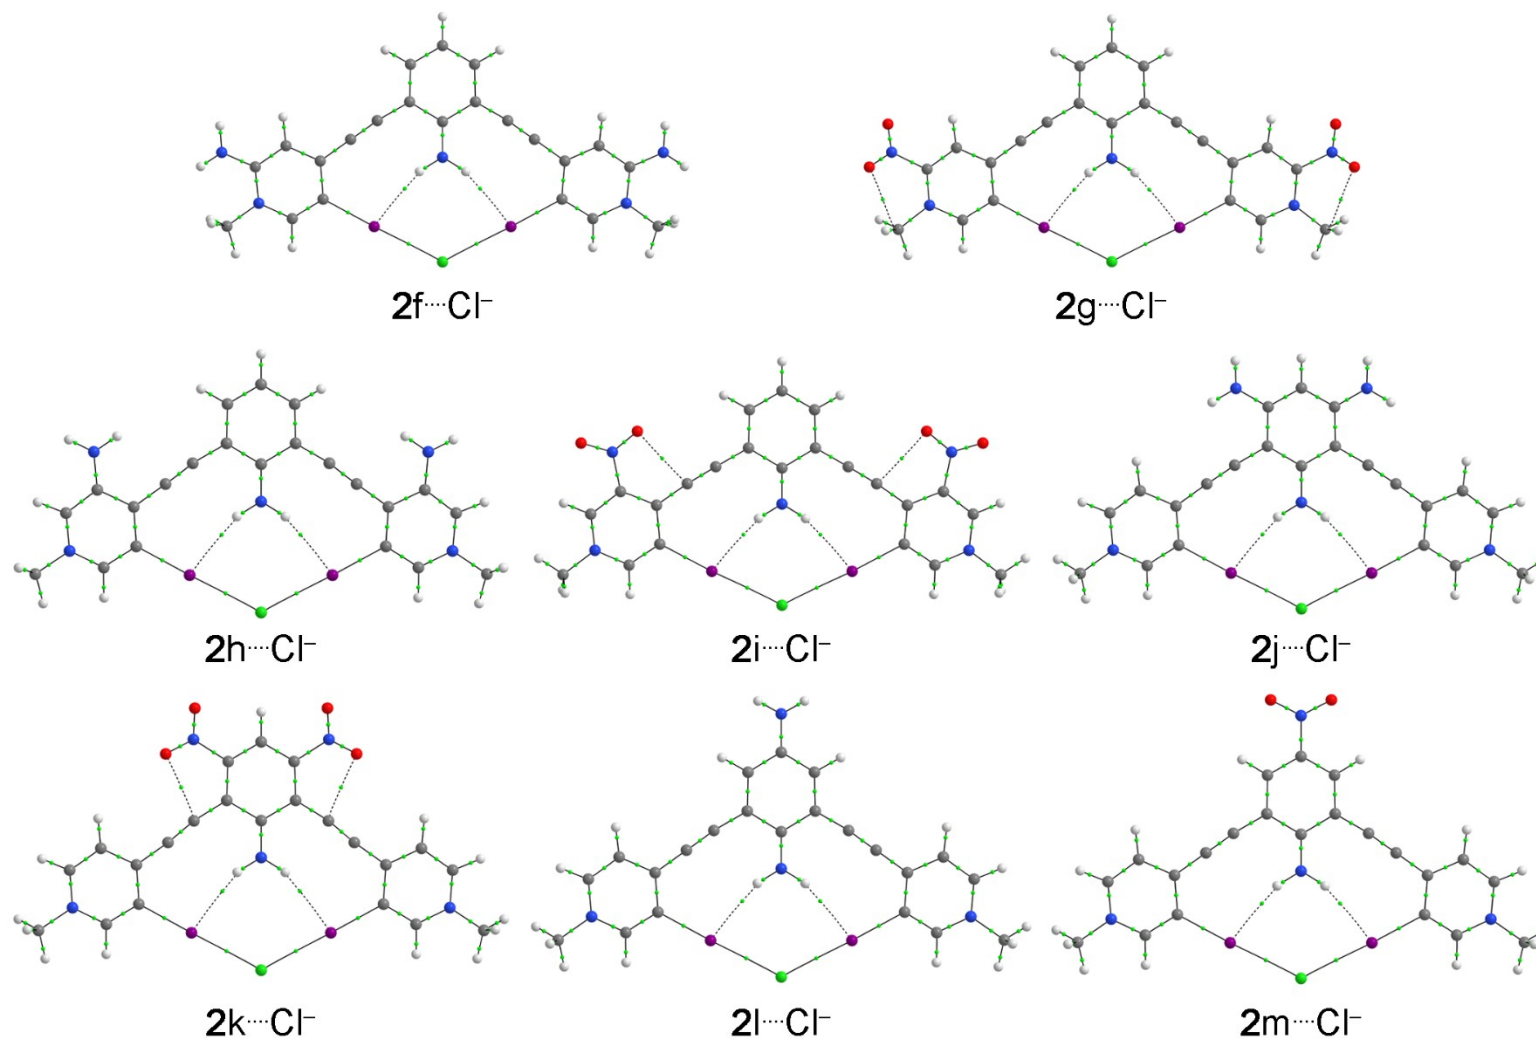

**Figure S9.** Topological map containing the bond paths (continuous or dashed lines connecting the cores) and bond critical points (small light green points), for the  $2(f-m)\cdots\text{Cl}^-$  complexes. Color code for atoms: H = white; C = gray; N = blue; O = red; Cl = green; and I = purple.

**Table S2.** Ratio between the kinetic energy density,  $G_b$ , and the potential energy density,  $V_b$ ,  $-G_b/V_b$ , and the electron density,  $\rho_b$ , at BCPs related to the interactions present in **1**( $_$  or a-h) $\cdots$ (Cl $^-$ , Br $^-$  or I $^-$ ) complexes. The values of all parameters are in a.u.

| Complex                       | BCP                   | $-G_b/V_b$ | $\rho_b$ |
|-------------------------------|-----------------------|------------|----------|
| <b>1a</b> $\cdots$ Cl $^-$    | C-Cl $\cdots$ Cl $^-$ | 1.106      | 0.022    |
|                               | N-H $\cdots$ Cl       | 1.229      | 0.017    |
|                               | N-H $\cdots$ Cl       | 1.229      | 0.017    |
| <b>1b</b> $\cdots$ Cl $^-$    | C-Br $\cdots$ Cl $^-$ | 1.014      | 0.028    |
|                               | N-H $\cdots$ Br       | 1.185      | 0.016    |
|                               | N-H $\cdots$ Br       | 1.185      | 0.016    |
| <b>1c</b> $\cdots$ Br $^-$    | C-I $\cdots$ Br $^-$  | 0.941      | 0.027    |
|                               | N-H $\cdots$ I        | 1.172      | 0.015    |
|                               | N-H $\cdots$ I        | 1.172      | 0.015    |
| <b>1</b> $_$ $\cdots$ Cl $^-$ | C-I $\cdots$ Cl $^-$  | 0.916      | 0.033    |
|                               | C-I $\cdots$ Cl $^-$  | 0.916      | 0.033    |
|                               | N-H $\cdots$ I        | 1.169      | 0.015    |
| <b>1c</b> $\cdots$ Cl $^-$    | N-H $\cdots$ I        | 1.169      | 0.015    |
|                               | C-I $\cdots$ I $^-$   | 0.964      | 0.021    |
|                               | N-H $\cdots$ I        | 1.175      | 0.015    |
| <b>1c</b> $\cdots$ I $^-$     | N-H $\cdots$ I        | 1.175      | 0.015    |
|                               | C-I $\cdots$ Cl $^-$  | 0.805      | 0.046    |
|                               | N-O $\cdots$ I        | 1.293      | 0.010    |
| <b>1d</b> $\cdots$ Cl $^-$    | N-O $\cdots$ I        | 1.293      | 0.010    |
|                               | C-I $\cdots$ Cl $^-$  | 0.911      | 0.034    |
|                               | N-H $\cdots$ I        | 1.154      | 0.016    |
| <b>1e</b> $\cdots$ Cl $^-$    | N-H $\cdots$ I        | 1.154      | 0.016    |
|                               | C-I $\cdots$ Cl $^-$  | 0.845      | 0.041    |
|                               | N-H $\cdots$ I        | 1.155      | 0.016    |
| <b>1f</b> $\cdots$ Cl $^-$    | N-H $\cdots$ I        | 1.155      | 0.016    |
|                               | C-I $\cdots$ Cl $^-$  | 0.921      | 0.032    |
|                               | N-H $\cdots$ I        | 1.169      | 0.015    |
| <b>1g</b> $\cdots$ Cl $^-$    | N-H $\cdots$ I        | 1.169      | 0.015    |
|                               | C-I $\cdots$ Cl $^-$  | 0.879      | 0.037    |
|                               | N-H $\cdots$ I        | 1.173      | 0.015    |
| <b>1h</b> $\cdots$ Cl $^-$    | N-H $\cdots$ I        | 1.173      | 0.015    |
|                               | C-I $\cdots$ Cl $^-$  | 0.879      | 0.037    |
|                               | N-H $\cdots$ I        | 1.173      | 0.015    |

**Table S3.** Ratio between the kinetic energy density,  $G_b$ , and the potential energy density,  $V_b$ ,  $-G_b/V_b$ , and the electron density,  $\rho_b$ , at BCPs related to the interactions present in **2**(- or a-c)···(Cl<sup>-</sup>, Br<sup>-</sup> or I<sup>-</sup>) complexes. The values of all parameters are in a.u.

| Complex                      | BCP                    | $-G_b/V_b$ | $\rho_b$ |
|------------------------------|------------------------|------------|----------|
| <b>2a</b> ···Cl <sup>-</sup> | C–Cl···Cl <sup>-</sup> | 1.094      | 0.023    |
|                              | C–Cl···Cl <sup>-</sup> | 1.094      | 0.023    |
|                              | N–H···Cl               | 1.472      | 0.009    |
|                              | N–H···Cl               | 1.472      | 0.009    |
|                              | N···Cl <sup>-</sup>    | 1.246      | 0.013    |
|                              | N···Cl <sup>-</sup>    | 1.246      | 0.013    |
| <b>2b</b> ···Cl <sup>-</sup> | C–Br···Cl <sup>-</sup> | 0.994      | 0.030    |
|                              | C–Br···Cl <sup>-</sup> | 0.994      | 0.030    |
|                              | N–H···Br               | 1.309      | 0.012    |
|                              | N–H···Br               | 1.309      | 0.012    |
|                              | N···Br <sup>-</sup>    | 1.352      | 0.007    |
|                              | N···Br <sup>-</sup>    | 1.352      | 0.007    |
| <b>2c</b> ···Br <sup>-</sup> | C–I···Br <sup>-</sup>  | 0.901      | 0.031    |
|                              | C–I···Br <sup>-</sup>  | 0.901      | 0.031    |
|                              | N–H···I                | 1.229      | 0.014    |
|                              | N–H···I                | 1.229      | 0.014    |
| <b>2</b> ···Cl <sup>-</sup>  | C–I···Cl <sup>-</sup>  | 0.890      | 0.036    |
|                              | C–I···Cl <sup>-</sup>  | 0.890      | 0.036    |
|                              | C–H···I                | 1.537      | 0.002    |
|                              | C–H···I                | 1.537      | 0.002    |
| <b>2c</b> ···Cl <sup>-</sup> | C–I···Cl <sup>-</sup>  | 0.907      | 0.034    |
|                              | C–I···Cl <sup>-</sup>  | 0.907      | 0.034    |
|                              | N–H···I                | 1.208      | 0.015    |
|                              | N–H···I                | 1.208      | 0.015    |
| <b>2c</b> ···I <sup>-</sup>  | C–I···I <sup>-</sup>   | 0.885      | 0.028    |
|                              | C–I···I <sup>-</sup>   | 0.885      | 0.028    |
|                              | N–H···I                | 1.251      | 0.012    |
|                              | N–H···I                | 1.251      | 0.012    |

**Table S4.** Ratio between the kinetic energy density,  $G_b$ , and the potential energy density,  $V_b$ ,  $-G_b/V_b$ , and the electron density,  $\rho_b$ , at BCPs related to the interactions present in **2**(d–m)···Cl<sup>-</sup> complexes. The values of all parameters are in a.u.

| Complex                      | BCP                   | $-G_b/V_b$ | $\rho_b$ |
|------------------------------|-----------------------|------------|----------|
| <b>2d</b> ···Cl <sup>-</sup> | C–I···Cl <sup>-</sup> | 0.917      | 0.033    |
|                              | C–I···Cl <sup>-</sup> | 0.917      | 0.033    |
|                              | N–H···I               | 1.241      | 0.014    |
|                              | N–H···I               | 1.241      | 0.014    |
|                              | N–H···I               | 1.173      | 0.016    |
|                              | N–H···I               | 1.173      | 0.016    |
| <b>2e</b> ···Cl <sup>-</sup> | C–I···Cl <sup>-</sup> | 0.886      | 0.036    |
|                              | C–I···Cl <sup>-</sup> | 0.886      | 0.036    |
|                              | N–H···I               | 1.204      | 0.015    |
|                              | N–H···I               | 1.204      | 0.015    |
| <b>2f</b> ···Cl <sup>-</sup> | C–I···Cl <sup>-</sup> | 0.911      | 0.034    |
|                              | C–I···Cl <sup>-</sup> | 0.910      | 0.034    |
|                              | N–H···I               | 1.207      | 0.015    |
|                              | N–H···I               | 1.207      | 0.015    |
| <b>2g</b> ···Cl <sup>-</sup> | C–I···Cl <sup>-</sup> | 0.901      | 0.035    |
|                              | C–I···Cl <sup>-</sup> | 0.901      | 0.035    |
|                              | N–H···I               | 1.210      | 0.015    |
|                              | N–H···I               | 1.210      | 0.015    |
| <b>2h</b> ···Cl <sup>-</sup> | C–I···Cl <sup>-</sup> | 0.908      | 0.034    |
|                              | C–I···Cl <sup>-</sup> | 0.908      | 0.034    |
|                              | N–H···I               | 1.214      | 0.014    |
|                              | N–H···I               | 1.214      | 0.014    |
| <b>2i</b> ···Cl <sup>-</sup> | C–I···Cl <sup>-</sup> | 0.907      | 0.034    |
|                              | C–I···Cl <sup>-</sup> | 0.907      | 0.034    |
|                              | N–H···I               | 1.174      | 0.017    |
|                              | N–H···I               | 1.173      | 0.017    |
| <b>2j</b> ···Cl <sup>-</sup> | C–I···Cl <sup>-</sup> | 0.912      | 0.034    |
|                              | C–I···Cl <sup>-</sup> | 0.912      | 0.034    |
|                              | N–H···I               | 1.203      | 0.015    |
|                              | N–H···I               | 1.203      | 0.015    |
| <b>2k</b> ···Cl <sup>-</sup> | C–I···Cl <sup>-</sup> | 0.895      | 0.035    |
|                              | C–I···Cl <sup>-</sup> | 0.895      | 0.035    |
|                              | N–H···I               | 1.236      | 0.013    |
|                              | N–H···I               | 1.236      | 0.013    |
| <b>2l</b> ···Cl <sup>-</sup> | C–I···Cl <sup>-</sup> | 0.908      | 0.034    |
|                              | C–I···Cl <sup>-</sup> | 0.908      | 0.034    |
|                              | N–H···I               | 1.206      | 0.015    |
|                              | N–H···I               | 1.206      | 0.015    |
| <b>2m</b> ···Cl <sup>-</sup> | C–I···Cl <sup>-</sup> | 0.904      | 0.034    |
|                              | C–I···Cl <sup>-</sup> | 0.904      | 0.034    |
|                              | N–H···I               | 1.207      | 0.015    |
|                              | N–H···I               | 1.207      | 0.015    |

**Table S5.** Optimized Cartesian coordinates for the compounds investigated in this study using the BLYP–D3(BJ)/Def2–TZVP computational model.

**1a<sup>•••</sup>Cl<sup>-</sup>**

|    |              |              |              |
|----|--------------|--------------|--------------|
| C  | 1.275086000  | 1.226727000  | -0.037535000 |
| C  | 0.583278000  | -0.000042000 | -0.085291000 |
| C  | 2.681949000  | 1.216353000  | 0.074730000  |
| C  | 1.275404000  | -1.226642000 | -0.037522000 |
| C  | 3.367019000  | 0.000305000  | 0.136599000  |
| C  | 2.682263000  | -1.215917000 | 0.074753000  |
| N  | 0.569865000  | 2.434192000  | -0.142918000 |
| N  | 0.570533000  | -2.434331000 | -0.142894000 |
| H  | 3.223592000  | 2.162273000  | 0.103481000  |
| H  | 4.453430000  | 0.000446000  | 0.226343000  |
| H  | 3.224140000  | -2.161700000 | 0.103521000  |
| H  | 0.983108000  | 3.210203000  | 0.364840000  |
| H  | -0.430177000 | 2.335012000  | 0.027832000  |
| H  | 0.983975000  | -3.210168000 | 0.364977000  |
| H  | -0.429537000 | -2.335412000 | 0.027875000  |
| Cl | -1.207191000 | -0.000278000 | -0.107844000 |
| Cl | -4.156416000 | 0.000020000  | 0.109456000  |

**1b<sup>•••</sup>Cl<sup>-</sup>**

|    |              |              |              |
|----|--------------|--------------|--------------|
| C  | -1.566051000 | -1.223645000 | -0.029593000 |
| C  | -0.869345000 | 0.000001000  | -0.066698000 |
| C  | -2.975498000 | -1.214899000 | 0.066121000  |
| C  | -1.566125000 | 1.223614000  | -0.029595000 |
| C  | -3.662139000 | -0.000070000 | 0.120079000  |
| C  | -2.975563000 | 1.214798000  | 0.066133000  |
| N  | -0.874840000 | -2.441981000 | -0.129668000 |
| N  | -0.874963000 | 2.441966000  | -0.129639000 |
| H  | -3.517155000 | -2.161402000 | 0.086901000  |
| H  | -4.749678000 | -0.000096000 | 0.197484000  |
| H  | -3.517266000 | 2.161274000  | 0.086946000  |
| H  | -1.305433000 | -3.210551000 | 0.375833000  |
| H  | 0.123279000  | -2.354864000 | 0.059824000  |
| H  | -1.305667000 | 3.210602000  | 0.375654000  |
| H  | 0.123150000  | 2.354938000  | 0.059892000  |
| Br | 1.129201000  | 0.000057000  | -0.056807000 |
| Cl | 4.033157000  | -0.000035000 | 0.106010000  |



**1c...Br<sup>-</sup>**

|    |              |              |              |
|----|--------------|--------------|--------------|
| C  | -2.401300000 | -1.220963000 | -0.020960000 |
| C  | -1.696293000 | -0.000005000 | -0.061567000 |
| C  | -3.810936000 | -1.213238000 | 0.083325000  |
| I  | 0.528599000  | -0.000007000 | -0.059891000 |
| C  | -2.401260000 | 1.220989000  | -0.020912000 |
| C  | -4.498213000 | 0.000020000  | 0.141152000  |
| C  | -3.810913000 | 1.213256000  | 0.083322000  |
| N  | -1.727870000 | -2.450090000 | -0.128031000 |
| N  | -1.727797000 | 2.450052000  | -0.127991000 |
| H  | -4.351862000 | -2.160237000 | 0.106978000  |
| H  | -5.585282000 | 0.000040000  | 0.225573000  |
| H  | -4.351840000 | 2.160260000  | 0.106992000  |
| H  | -2.174582000 | -3.215148000 | 0.369314000  |
| H  | -0.729122000 | -2.386279000 | 0.068635000  |
| H  | -2.174635000 | 3.215320000  | 0.368883000  |
| H  | -0.729066000 | 2.386310000  | 0.068704000  |
| Br | 3.656679000  | 0.000000000  | 0.069290000  |

**1...Cl<sup>-</sup>**

|    |              |              |              |
|----|--------------|--------------|--------------|
| C  | -2.013761000 | 1.207047000  | -0.000013000 |
| C  | -1.295105000 | 0.000168000  | -0.000117000 |
| C  | -3.414913000 | 1.208245000  | 0.000138000  |
| C  | -2.013215000 | -1.207037000 | -0.000013000 |
| C  | -4.123704000 | -0.000474000 | 0.000208000  |
| C  | -3.414363000 | -1.208872000 | 0.000144000  |
| H  | -3.955205000 | 2.156499000  | 0.000213000  |
| H  | -5.213657000 | -0.000721000 | 0.000325000  |
| H  | -3.954221000 | -2.157371000 | 0.000213000  |
| I  | 0.915732000  | 0.000285000  | -0.000152000 |
| Cl | 3.834223000  | -0.000484000 | 0.000312000  |
| H  | -1.471569000 | 2.152509000  | -0.000027000 |
| H  | -1.470553000 | -2.152255000 | -0.000050000 |

**1c...Cl<sup>-</sup>**

|   |              |              |              |
|---|--------------|--------------|--------------|
| C | -1.861238000 | -1.219194000 | -0.028677000 |
| C | -1.152489000 | -0.000074000 | -0.063569000 |
| C | -3.271607000 | -1.212890000 | 0.064966000  |
| I | 1.080273000  | -0.000070000 | -0.037413000 |
| C | -1.860925000 | 1.219287000  | -0.028679000 |
| C | -3.959917000 | 0.000244000  | 0.118100000  |
| C | -3.271328000 | 1.213197000  | 0.064965000  |

|    |              |              |              |
|----|--------------|--------------|--------------|
| N  | -1.186332000 | -2.449897000 | -0.130288000 |
| N  | -1.185798000 | 2.449730000  | -0.130187000 |
| H  | -3.812705000 | -2.160105000 | 0.084175000  |
| H  | -5.047732000 | 0.000391000  | 0.194295000  |
| H  | -3.812264000 | 2.160515000  | 0.084260000  |
| H  | -1.631434000 | -3.210169000 | 0.376325000  |
| H  | -0.188754000 | -2.379590000 | 0.072048000  |
| H  | -1.631019000 | 3.210467000  | 0.375538000  |
| H  | -0.188209000 | 2.379488000  | 0.071952000  |
| Cl | 3.995740000  | 0.000029000  | 0.104999000  |

**1c...I<sup>-</sup>**

|   |              |              |              |
|---|--------------|--------------|--------------|
| C | -2.885118000 | 1.222352000  | 0.014771000  |
| C | -2.183569000 | 0.000077000  | 0.059617000  |
| C | -4.294236000 | 1.212869000  | -0.097244000 |
| I | 0.038171000  | 0.000505000  | 0.074964000  |
| H | -4.835469000 | 2.159406000  | -0.124190000 |
| C | -2.884319000 | -1.222824000 | 0.014765000  |
| C | -4.979957000 | -0.000841000 | -0.158699000 |
| H | -6.066424000 | -0.001247000 | -0.249107000 |
| C | -4.293399000 | -1.214126000 | -0.097479000 |
| H | -4.834101000 | -2.160971000 | -0.124915000 |
| N | -2.213069000 | 2.450552000  | 0.125559000  |
| H | -2.660744000 | 3.218496000  | -0.365955000 |
| H | -1.213369000 | 2.391663000  | -0.065873000 |
| N | -2.211526000 | -2.450375000 | 0.125696000  |
| H | -2.659687000 | -3.219403000 | -0.363618000 |
| H | -1.212005000 | -2.391553000 | -0.066524000 |
| I | 3.425557000  | -0.000178000 | -0.052567000 |

**1d...Cl<sup>-</sup>**

|   |              |              |              |
|---|--------------|--------------|--------------|
| C | 1.700418000  | 1.174437000  | 0.023285000  |
| C | 0.935325000  | -0.000001000 | 0.142156000  |
| C | 3.077346000  | 1.202866000  | -0.218058000 |
| I | -1.336798000 | 0.000002000  | 0.018453000  |
| C | 1.700415000  | -1.174441000 | 0.023286000  |
| C | 3.776926000  | -0.000005000 | -0.328546000 |
| C | 3.077343000  | -1.202874000 | -0.218057000 |
| N | 1.068196000  | 2.522304000  | 0.175676000  |
| O | 0.326839000  | 2.707913000  | 1.145005000  |
| O | 1.371158000  | 3.388279000  | -0.668109000 |
| N | 1.068188000  | -2.522305000 | 0.175676000  |

|    |              |              |              |
|----|--------------|--------------|--------------|
| O  | 0.326837000  | -2.707914000 | 1.145009000  |
| O  | 1.371141000  | -3.388278000 | -0.668114000 |
| H  | 3.581578000  | 2.161260000  | -0.314988000 |
| H  | 4.851025000  | -0.000007000 | -0.501433000 |
| H  | 3.581572000  | -2.161269000 | -0.314986000 |
| Cl | -4.052532000 | 0.000003000  | -0.381221000 |

**1e...Cl<sup>-</sup>**

|    |              |              |              |
|----|--------------|--------------|--------------|
| C  | -1.405400000 | -1.220193000 | -0.009877000 |
| C  | -0.706334000 | 0.000015000  | -0.024797000 |
| C  | -2.817280000 | -1.216601000 | 0.032011000  |
| I  | 1.528828000  | 0.000012000  | -0.018572000 |
| C  | -1.405431000 | 1.220194000  | -0.009893000 |
| C  | -3.509938000 | -0.000015000 | 0.067085000  |
| C  | -2.817306000 | 1.216585000  | 0.032008000  |
| N  | -0.758799000 | -2.495957000 | -0.091376000 |
| N  | -0.758797000 | 2.495969000  | -0.091365000 |
| N  | -3.498188000 | -2.470915000 | 0.081751000  |
| N  | -3.498230000 | 2.470876000  | 0.081736000  |
| H  | -4.602078000 | -0.000029000 | 0.094762000  |
| H  | -0.979679000 | -3.077274000 | 0.721021000  |
| H  | 0.255542000  | -2.372153000 | -0.133597000 |
| H  | -0.979826000 | 3.077359000  | 0.720940000  |
| H  | 0.255551000  | 2.372143000  | -0.133339000 |
| H  | -2.986386000 | -3.165630000 | -0.468363000 |
| H  | -4.454472000 | -2.396294000 | -0.263964000 |
| H  | -4.454517000 | 2.396224000  | -0.263963000 |
| H  | -2.986441000 | 3.165560000  | -0.468430000 |
| Cl | 4.439566000  | -0.000014000 | 0.046752000  |

**1f...Cl<sup>-</sup>**

|   |              |              |              |
|---|--------------|--------------|--------------|
| C | 0.718360000  | 1.231719000  | 0.000208000  |
| C | 0.033504000  | -0.000067000 | 0.000282000  |
| C | 2.171996000  | 1.212149000  | 0.000048000  |
| I | -2.228462000 | -0.000116000 | 0.000141000  |
| C | 0.718467000  | -1.231812000 | 0.000246000  |
| C | 2.852340000  | 0.000067000  | -0.000047000 |
| C | 2.172121000  | -1.212085000 | 0.000065000  |
| N | 0.030476000  | 2.399681000  | 0.000495000  |
| N | 0.030673000  | -2.399830000 | 0.000627000  |
| N | 2.987098000  | 2.413267000  | -0.000236000 |
| O | 2.420355000  | 3.545164000  | -0.000494000 |

|    |              |              |              |
|----|--------------|--------------|--------------|
| O  | 4.231853000  | 2.306759000  | 0.000057000  |
| N  | 2.987460000  | -2.413039000 | -0.000224000 |
| O  | 4.232184000  | -2.306191000 | 0.000068000  |
| O  | 2.421020000  | -3.545086000 | -0.000592000 |
| H  | 3.934672000  | 0.000120000  | -0.000236000 |
| H  | 0.553871000  | 3.268912000  | -0.000343000 |
| H  | -0.984514000 | 2.357615000  | 0.000006000  |
| H  | 0.554139000  | -3.269015000 | -0.000414000 |
| H  | -0.984323000 | -2.357849000 | 0.000012000  |
| Cl | -5.038786000 | 0.000046000  | -0.000484000 |

1g...Cl-

|    |              |              |              |
|----|--------------|--------------|--------------|
| C  | -1.535568000 | -1.213913000 | -0.047977000 |
| C  | -0.819909000 | -0.000117000 | -0.078295000 |
| C  | -2.945656000 | -1.210761000 | 0.027544000  |
| I  | 1.410915000  | -0.000222000 | -0.034849000 |
| C  | -1.535267000 | 1.213921000  | -0.047968000 |
| C  | -3.646520000 | 0.000217000  | 0.070393000  |
| C  | -2.945376000 | 1.211017000  | 0.027549000  |
| N  | -0.865280000 | -2.448145000 | -0.139884000 |
| N  | -0.864879000 | 2.447995000  | -0.139915000 |
| N  | -5.066566000 | 0.000387000  | 0.213129000  |
| H  | -3.488550000 | -2.158163000 | 0.041588000  |
| H  | -3.488092000 | 2.158527000  | 0.041596000  |
| H  | -1.309772000 | -3.200520000 | 0.379226000  |
| H  | 0.132127000  | -2.375141000 | 0.063147000  |
| H  | -1.309215000 | 3.200500000  | 0.379110000  |
| H  | 0.132619000  | 2.374978000  | 0.062607000  |
| H  | -5.490886000 | -0.829874000 | -0.197441000 |
| H  | -5.490681000 | 0.830825000  | -0.197297000 |
| Cl | 4.334165000  | 0.000400000  | 0.119629000  |

1h...Cl-

|   |              |              |              |
|---|--------------|--------------|--------------|
| C | -0.987366000 | 1.223916000  | 0.085096000  |
| C | -0.275085000 | -0.000012000 | 0.101884000  |
| C | -2.393465000 | 1.224088000  | 0.025888000  |
| I | 1.948207000  | -0.000051000 | 0.031832000  |
| C | -0.987396000 | -1.223920000 | 0.085093000  |
| C | -3.065713000 | 0.000016000  | -0.010264000 |
| C | -2.393491000 | -1.224070000 | 0.025879000  |
| N | -0.308674000 | 2.445538000  | 0.172320000  |
| N | -0.308692000 | -2.445536000 | 0.172281000  |

|    |              |              |              |
|----|--------------|--------------|--------------|
| N  | -4.532806000 | 0.000030000  | -0.086974000 |
| O  | -5.130160000 | 1.099504000  | -0.119379000 |
| O  | -5.130185000 | -1.099431000 | -0.119348000 |
| H  | -2.959567000 | 2.150564000  | 0.011765000  |
| H  | -2.959605000 | -2.150537000 | 0.011732000  |
| H  | -0.781131000 | 3.231011000  | -0.263926000 |
| H  | 0.682136000  | 2.389574000  | -0.059259000 |
| H  | -0.781148000 | -3.231041000 | -0.263899000 |
| H  | 0.682131000  | -2.389589000 | -0.059258000 |
| Cl | 4.800665000  | 0.000107000  | -0.167016000 |

**1a**

|    |              |              |              |
|----|--------------|--------------|--------------|
| C  | -0.306242000 | -1.235794000 | -0.008787000 |
| C  | 0.370823000  | 0.000000000  | -0.011667000 |
| C  | -1.716411000 | -1.215992000 | 0.003731000  |
| C  | -0.306242000 | 1.235794000  | -0.008787000 |
| C  | -2.399286000 | 0.000000000  | 0.011265000  |
| C  | -1.716411000 | 1.215992000  | 0.003731000  |
| N  | 0.390280000  | -2.441830000 | -0.074266000 |
| N  | 0.390281000  | 2.441830000  | -0.074266000 |
| H  | -2.259354000 | -2.159760000 | -0.000084000 |
| H  | -3.487948000 | 0.000000000  | 0.022950000  |
| H  | -2.259354000 | 2.159760000  | -0.000084000 |
| H  | -0.112663000 | -3.250283000 | 0.275436000  |
| H  | 1.359539000  | -2.407301000 | 0.225949000  |
| H  | -0.112662000 | 3.250283000  | 0.275436000  |
| H  | 1.359539000  | 2.407300000  | 0.225949000  |
| Cl | 2.146564000  | 0.000000000  | 0.004544000  |

**1b**

|   |             |              |              |
|---|-------------|--------------|--------------|
| C | 0.786973000 | 1.236808000  | -0.008453000 |
| C | 0.111347000 | 0.000000000  | -0.011898000 |
| C | 2.198205000 | 1.215257000  | 0.004142000  |
| C | 0.786973000 | -1.236808000 | -0.008453000 |
| C | 2.881068000 | 0.000000000  | 0.011320000  |
| C | 2.198205000 | -1.215257000 | 0.004142000  |
| N | 0.102138000 | 2.448653000  | -0.074089000 |
| N | 0.102138000 | -2.448653000 | -0.074089000 |
| H | 2.740751000 | 2.159323000  | 0.001031000  |
| H | 3.969733000 | 0.000000000  | 0.023168000  |
| H | 2.740751000 | -2.159323000 | 0.001031000  |
| H | 0.616873000 | 3.254001000  | 0.265520000  |

|    |              |              |             |
|----|--------------|--------------|-------------|
| H  | -0.866346000 | 2.428470000  | 0.230887000 |
| H  | 0.616873000  | -3.254001000 | 0.265520000 |
| H  | -0.866346000 | -2.428470000 | 0.230887000 |
| Br | -1.833110000 | 0.000000000  | 0.002126000 |

**1<sub>l</sub>**

|   |              |              |              |
|---|--------------|--------------|--------------|
| C | -1.258498000 | 1.218769000  | 0.000202000  |
| C | -0.572463000 | -0.000010000 | 0.000092000  |
| C | -2.658877000 | 1.210062000  | 0.000425000  |
| C | -1.258505000 | -1.218773000 | 0.000202000  |
| C | -3.361268000 | 0.000004000  | 0.000538000  |
| C | -2.658893000 | -1.210053000 | 0.000426000  |
| H | -3.196926000 | 2.156763000  | 0.000511000  |
| H | -4.449547000 | 0.000014000  | 0.000712000  |
| H | -3.196940000 | -2.156755000 | 0.000511000  |
| I | 1.563832000  | 0.000000000  | -0.000250000 |
| H | -0.714317000 | 2.159516000  | 0.000116000  |
| H | -0.714344000 | -2.159532000 | 0.000116000  |

**1<sub>c</sub>**

|   |              |              |              |
|---|--------------|--------------|--------------|
| C | 1.185123000  | 1.236014000  | -0.006093000 |
| C | 0.503327000  | 0.000000000  | -0.009950000 |
| C | 2.597073000  | 1.214009000  | 0.003059000  |
| I | -1.643874000 | 0.000000000  | 0.000039000  |
| C | 1.185123000  | -1.236014000 | -0.006093000 |
| C | 3.280683000  | 0.000000000  | 0.007537000  |
| C | 2.597073000  | -1.214009000 | 0.003059000  |
| N | 0.513998000  | 2.456078000  | -0.070158000 |
| N | 0.513998000  | -2.456078000 | -0.070158000 |
| H | 3.139168000  | 2.158467000  | 0.000222000  |
| H | 4.369405000  | 0.000000000  | 0.016815000  |
| H | 3.139168000  | -2.158467000 | 0.000222000  |
| H | 1.045400000  | 3.256814000  | 0.254938000  |
| H | -0.449815000 | 2.454784000  | 0.251955000  |
| H | 1.045399000  | -3.256814000 | 0.254938000  |
| H | -0.449815000 | -2.454784000 | 0.251955000  |

**1<sub>d</sub>**

|   |              |              |              |
|---|--------------|--------------|--------------|
| C | -1.190407000 | 1.142090000  | -0.003713000 |
| C | 0.000000000  | 0.395219000  | -0.000003000 |
| C | -1.204086000 | 2.538288000  | 0.029315000  |
| I | -0.000001000 | -1.725413000 | -0.000004000 |

|   |              |              |              |
|---|--------------|--------------|--------------|
| C | 1.190408000  | 1.142087000  | 0.003708000  |
| C | 0.000003000  | 3.241171000  | -0.000010000 |
| C | 1.204090000  | 2.538284000  | -0.029328000 |
| N | -2.531460000 | 0.486997000  | -0.052730000 |
| O | -3.336359000 | 0.812518000  | 0.830043000  |
| O | -2.746904000 | -0.299263000 | -0.980516000 |
| N | 2.531461000  | 0.486993000  | 0.052744000  |
| O | 2.746894000  | -0.299263000 | 0.980535000  |
| O | 3.336370000  | 0.812509000  | -0.830022000 |
| H | -2.160468000 | 3.053010000  | 0.065759000  |
| H | 0.000004000  | 4.328128000  | -0.000014000 |
| H | 2.160473000  | 3.053004000  | -0.065772000 |

**1e**

|   |              |              |              |
|---|--------------|--------------|--------------|
| C | 0.749713000  | 1.237148000  | -0.001800000 |
| C | 0.079609000  | 0.000000000  | -0.012928000 |
| C | 2.164780000  | 1.220648000  | 0.008141000  |
| I | -2.069682000 | 0.000000000  | -0.003933000 |
| C | 0.749713000  | -1.237148000 | -0.001800000 |
| C | 2.846961000  | 0.000000000  | 0.015226000  |
| C | 2.164781000  | -1.220648000 | 0.008141000  |
| N | 0.109715000  | 2.496010000  | -0.051957000 |
| N | 0.109716000  | -2.496010000 | -0.051957000 |
| N | 2.840605000  | 2.471131000  | 0.059878000  |
| N | 2.840606000  | -2.471130000 | 0.059878000  |
| H | 3.937923000  | 0.000000000  | -0.001537000 |
| H | 0.540925000  | 3.166705000  | 0.585829000  |
| H | -0.894354000 | 2.443052000  | 0.110285000  |
| H | 0.540924000  | -3.166704000 | 0.585831000  |
| H | -0.894353000 | -2.443053000 | 0.110282000  |
| H | 2.466817000  | 3.137551000  | -0.618588000 |
| H | 3.845304000  | 2.375387000  | -0.072905000 |
| H | 3.845304000  | -2.375387000 | -0.072909000 |
| H | 2.466815000  | -3.137552000 | -0.618584000 |

**1f**

|   |              |              |              |
|---|--------------|--------------|--------------|
| C | -0.112913000 | 1.251194000  | -0.000005000 |
| C | 0.549284000  | -0.000001000 | -0.000017000 |
| C | -1.558682000 | 1.212447000  | 0.000038000  |
| I | 2.692181000  | -0.000002000 | -0.000080000 |
| C | -0.112914000 | -1.251195000 | 0.000011000  |
| C | -2.232449000 | 0.000001000  | 0.000066000  |

|   |              |              |              |
|---|--------------|--------------|--------------|
| C | -1.558684000 | -1.212447000 | 0.000054000  |
| N | 0.559201000  | 2.421504000  | -0.000031000 |
| N | 0.559202000  | -2.421504000 | 0.000000000  |
| N | -2.381776000 | 2.421232000  | 0.000054000  |
| O | -1.812728000 | 3.547208000  | 0.000029000  |
| O | -3.615555000 | 2.298441000  | 0.000092000  |
| N | -2.381783000 | -2.421228000 | 0.000085000  |
| O | -3.615561000 | -2.298430000 | 0.000123000  |
| O | -1.812743000 | -3.547208000 | 0.000076000  |
| H | -3.316150000 | 0.000001000  | 0.000098000  |
| H | 0.006820000  | 3.277825000  | -0.000019000 |
| H | 1.571911000  | 2.426564000  | -0.000061000 |
| H | 0.006823000  | -3.277826000 | 0.000022000  |
| H | 1.571912000  | -2.426561000 | -0.000031000 |

**1g**

|   |              |              |              |
|---|--------------|--------------|--------------|
| C | 0.859247000  | 1.230402000  | -0.005570000 |
| C | 0.167141000  | 0.000000000  | -0.009475000 |
| C | 2.266465000  | 1.213294000  | 0.003147000  |
| I | -1.976660000 | 0.000000000  | -0.001161000 |
| C | 0.859247000  | -1.230402000 | -0.005570000 |
| C | 2.970033000  | 0.000000000  | 0.007206000  |
| C | 2.266465000  | -1.213294000 | 0.003147000  |
| N | 0.191184000  | 2.454428000  | -0.070615000 |
| N | 0.191184000  | -2.454428000 | -0.070615000 |
| N | 4.373394000  | 0.000000000  | 0.083222000  |
| H | 2.807698000  | 2.159323000  | 0.004824000  |
| H | 2.807698000  | -2.159323000 | 0.004824000  |
| H | 0.718814000  | 3.248191000  | 0.277667000  |
| H | -0.773500000 | 2.447165000  | 0.249523000  |
| H | 0.718814000  | -3.248191000 | 0.277667000  |
| H | -0.773500000 | -2.447165000 | 0.249523000  |
| H | 4.817526000  | 0.839680000  | -0.276876000 |
| H | 4.817526000  | -0.839680000 | -0.276876000 |

**1h**

|   |              |              |              |
|---|--------------|--------------|--------------|
| C | 0.318584000  | 1.239297000  | -0.009007000 |
| C | -0.364278000 | 0.000000000  | -0.009261000 |
| C | 1.728070000  | 1.223940000  | -0.006827000 |
| I | -2.501905000 | 0.000000000  | 0.002570000  |
| C | 0.318584000  | -1.239297000 | -0.009006000 |
| C | 2.387922000  | 0.000000000  | -0.005569000 |



|   |              |              |              |
|---|--------------|--------------|--------------|
| C | 1.728070000  | -1.223941000 | -0.006826000 |
| N | -0.349630000 | 2.453877000  | -0.067137000 |
| N | -0.349630000 | -2.453877000 | -0.067132000 |
| N | 3.877856000  | 0.000000000  | 0.005067000  |
| O | 4.457536000  | 1.098474000  | 0.009926000  |
| O | 4.457536000  | -1.098474000 | 0.009913000  |
| H | 2.297033000  | 2.148092000  | -0.009626000 |
| H | 2.297034000  | -2.148093000 | -0.009624000 |
| H | 0.184561000  | 3.268421000  | 0.213973000  |
| H | -1.317340000 | 2.463747000  | 0.239877000  |
| H | 0.184561000  | -3.268422000 | 0.213973000  |
| H | -1.317342000 | -2.463747000 | 0.239877000  |

**2a...Cl<sup>-</sup>**

|    |              |              |              |
|----|--------------|--------------|--------------|
| Cl | -2.784206000 | -1.695507000 | -0.010718000 |
| Cl | 2.784167000  | -1.695473000 | -0.010719000 |
| Cl | 0.000002000  | -2.515043000 | -0.031352000 |
| N  | -6.765008000 | -1.321246000 | 0.021360000  |
| N  | 6.764973000  | -1.321294000 | 0.021392000  |
| C  | -5.494639000 | -1.829170000 | 0.011122000  |
| C  | -4.386457000 | -1.002836000 | 0.004663000  |
| C  | -4.562440000 | 0.421565000  | 0.010733000  |
| C  | -5.899449000 | 0.901957000  | 0.022361000  |
| C  | -6.965458000 | 0.029201000  | 0.025276000  |
| C  | -3.458224000 | 1.273688000  | 0.007588000  |
| C  | -2.451493000 | 1.974096000  | 0.004460000  |
| C  | -1.240789000 | 2.676149000  | -0.001393000 |
| C  | -1.205680000 | 4.086311000  | -0.029908000 |
| C  | -0.000012000 | 4.787782000  | -0.042887000 |
| C  | 1.205678000  | 4.086347000  | -0.029903000 |
| C  | 0.000028000  | 1.924549000  | 0.020548000  |
| C  | 1.240824000  | 2.676188000  | -0.001388000 |
| C  | 2.451540000  | 1.974154000  | 0.004468000  |
| C  | 3.458256000  | 1.273726000  | 0.007597000  |
| C  | 4.562450000  | 0.421572000  | 0.010744000  |
| C  | 5.899473000  | 0.901933000  | 0.022390000  |
| C  | 6.965459000  | 0.029152000  | 0.025311000  |
| C  | 4.386432000  | -1.002822000 | 0.004670000  |
| C  | 5.494596000  | -1.829184000 | 0.011138000  |
| C  | -7.917753000 | -2.253659000 | -0.024886000 |
| C  | 7.917728000  | -2.253692000 | -0.024964000 |
| H  | -5.400235000 | -2.910729000 | 0.007848000  |

|   |              |              |              |
|---|--------------|--------------|--------------|
| H | -6.089915000 | 1.970958000  | 0.031209000  |
| H | -7.997326000 | 0.364144000  | 0.031671000  |
| H | -2.151896000 | 4.622453000  | -0.043590000 |
| H | -0.000028000 | 5.874068000  | -0.065643000 |
| H | 2.151879000  | 4.622516000  | -0.043581000 |
| H | 6.089963000  | 1.970929000  | 0.031251000  |
| H | 7.997338000  | 0.364065000  | 0.031717000  |
| H | 5.400161000  | -2.910740000 | 0.007862000  |
| H | -8.052027000 | -2.623803000 | -1.047481000 |
| H | -8.817169000 | -1.724464000 | 0.296710000  |
| H | -7.728769000 | -3.093060000 | 0.649966000  |
| H | 8.052670000  | -2.622895000 | -1.047813000 |
| H | 7.728267000  | -3.093706000 | 0.648981000  |
| H | 8.816946000  | -1.724822000 | 0.297729000  |
| N | 0.000060000  | 0.593818000  | 0.065744000  |
| H | 0.846557000  | 0.028288000  | 0.062346000  |
| H | -0.846387000 | 0.028211000  | 0.062336000  |

**2b...Cl<sup>-</sup>**

|    |              |              |              |
|----|--------------|--------------|--------------|
| Br | -2.673537000 | -1.541508000 | -0.004786000 |
| Br | 2.673548000  | -1.541517000 | -0.004789000 |
| Cl | 0.000006000  | -2.532370000 | -0.007316000 |
| N  | -6.821306000 | -0.985042000 | -0.011179000 |
| N  | 6.821313000  | -0.985025000 | -0.011177000 |
| C  | -5.561630000 | -1.519236000 | -0.007553000 |
| C  | -4.434194000 | -0.721381000 | -0.003316000 |
| C  | -4.581199000 | 0.704225000  | -0.001075000 |
| C  | -5.906520000 | 1.217808000  | -0.004784000 |
| C  | -6.992220000 | 0.370316000  | -0.008128000 |
| C  | -3.463322000 | 1.541828000  | 0.000801000  |
| C  | -2.452692000 | 2.235523000  | 0.001285000  |
| C  | -1.238680000 | 2.935083000  | 0.002134000  |
| C  | -1.204872000 | 4.345937000  | 0.003749000  |
| C  | 0.000004000  | 5.048174000  | 0.004599000  |
| C  | 1.204871000  | 4.345921000  | 0.003748000  |
| C  | -0.000013000 | 2.185049000  | 0.001186000  |
| C  | 1.238663000  | 2.935066000  | 0.002133000  |
| C  | 2.452670000  | 2.235497000  | 0.001282000  |
| C  | 3.463308000  | 1.541816000  | 0.000797000  |
| C  | 4.581192000  | 0.704223000  | -0.001078000 |
| C  | 5.906510000  | 1.217817000  | -0.004785000 |
| C  | 6.992216000  | 0.370334000  | -0.008127000 |

|   |              |              |              |
|---|--------------|--------------|--------------|
| C | 4.434199000  | -0.721384000 | -0.003317000 |
| C | 5.561642000  | -1.519230000 | -0.007552000 |
| C | -7.999433000 | -1.884785000 | 0.042820000  |
| C | 7.999449000  | -1.884757000 | 0.042825000  |
| H | -5.498457000 | -2.603360000 | -0.009447000 |
| H | -6.072256000 | 2.291187000  | -0.007992000 |
| H | -8.016668000 | 0.727803000  | -0.009387000 |
| H | -2.151795000 | 4.880937000  | 0.004373000  |
| H | 0.000012000  | 6.134710000  | 0.005885000  |
| H | 2.151800000  | 4.880908000  | 0.004371000  |
| H | 6.072236000  | 2.291198000  | -0.007994000 |
| H | 8.016662000  | 0.727830000  | -0.009385000 |
| H | 5.498478000  | -2.603355000 | -0.009444000 |
| H | -7.776237000 | -2.800263000 | -0.510654000 |
| H | -8.854309000 | -1.382667000 | -0.416112000 |
| H | -8.229685000 | -2.130189000 | 1.085812000  |
| H | 7.776252000  | -2.800250000 | -0.510624000 |
| H | 8.229719000  | -2.130135000 | 1.085819000  |
| H | 8.854314000  | -1.382643000 | -0.416132000 |
| N | -0.000030000 | 0.848176000  | -0.000719000 |
| H | 0.858882000  | 0.302282000  | -0.001965000 |
| H | -0.858971000 | 0.302326000  | -0.001965000 |

**2c...Br<sup>-</sup>**

|    |              |              |              |
|----|--------------|--------------|--------------|
| I  | -2.647471000 | 1.321767000  | -0.003328000 |
| I  | 2.647471000  | 1.321766000  | -0.003328000 |
| Br | 0.000000000  | 2.811139000  | -0.006432000 |
| N  | -6.952958000 | 0.370294000  | -0.007807000 |
| N  | 6.952958000  | 0.370295000  | -0.007807000 |
| C  | -5.724744000 | 0.973648000  | -0.004282000 |
| C  | -4.546766000 | 0.249888000  | -0.001477000 |
| C  | -4.620347000 | -1.180668000 | -0.000351000 |
| C  | -5.913097000 | -1.774200000 | -0.004183000 |
| C  | -7.046558000 | -0.993087000 | -0.006404000 |
| C  | -3.466484000 | -1.972138000 | 0.000741000  |
| C  | -2.452596000 | -2.660355000 | 0.000640000  |
| C  | -1.237222000 | -3.360767000 | 0.000729000  |
| C  | -1.204844000 | -4.771899000 | -0.000017000 |
| C  | 0.000000000  | -5.474043000 | -0.000301000 |
| C  | 1.204844000  | -4.771899000 | -0.000017000 |
| C  | 0.000000000  | -2.615154000 | 0.001332000  |
| C  | 1.237222000  | -3.360767000 | 0.000729000  |

|   |              |              |              |
|---|--------------|--------------|--------------|
| C | 2.452596000  | -2.660355000 | 0.000640000  |
| C | 3.466484000  | -1.972138000 | 0.000741000  |
| C | 4.620347000  | -1.180668000 | -0.000351000 |
| C | 5.913098000  | -1.774200000 | -0.004183000 |
| C | 7.046558000  | -0.993087000 | -0.006404000 |
| C | 4.546766000  | 0.249888000  | -0.001477000 |
| C | 5.724744000  | 0.973648000  | -0.004282000 |
| C | -8.185224000 | 1.194104000  | 0.045478000  |
| C | 8.185224000  | 1.194105000  | 0.045478000  |
| H | -5.733556000 | 2.060052000  | -0.005268000 |
| H | -6.015100000 | -2.855699000 | -0.008260000 |
| H | -8.048942000 | -1.408902000 | -0.007844000 |
| H | -2.151972000 | -5.306437000 | -0.000408000 |
| H | 0.000000000  | -6.560614000 | -0.000868000 |
| H | 2.151972000  | -5.306437000 | -0.000408000 |
| H | 6.015100000  | -2.855699000 | -0.008260000 |
| H | 8.048942000  | -1.408902000 | -0.007844000 |
| H | 5.733555000  | 2.060052000  | -0.005268000 |
| H | -8.510165000 | 1.306694000  | 1.086061000  |
| H | -8.970437000 | 0.704604000  | -0.536462000 |
| H | -7.975835000 | 2.176987000  | -0.382600000 |
| H | 8.510166000  | 1.306693000  | 1.086062000  |
| H | 7.975834000  | 2.176988000  | -0.382598000 |
| H | 8.970436000  | 0.704606000  | -0.536463000 |
| N | 0.000000000  | -1.273490000 | 0.002485000  |
| H | 0.867939000  | -0.739976000 | 0.001749000  |
| H | -0.867939000 | -0.739976000 | 0.001749000  |

## 2...Cl<sup>-</sup>

|    |              |              |              |
|----|--------------|--------------|--------------|
| I  | 2.465014000  | -1.401097000 | -0.003472000 |
| I  | -2.465014000 | -1.401097000 | -0.003471000 |
| Cl | 0.000000000  | -2.845935000 | -0.006909000 |
| N  | 6.804874000  | -0.668458000 | -0.006900000 |
| N  | -6.804874000 | -0.668458000 | -0.006900000 |
| C  | 5.549041000  | -1.203815000 | -0.004422000 |
| C  | 4.405674000  | -0.417800000 | -0.001909000 |
| C  | 4.569346000  | 1.003384000  | -0.000663000 |
| C  | 5.886726000  | 1.528274000  | -0.003635000 |
| C  | 6.978271000  | 0.686118000  | -0.005821000 |
| C  | 3.450426000  | 1.853661000  | 0.000274000  |
| C  | 2.437887000  | 2.534291000  | 0.000605000  |
| C  | 1.220596000  | 3.258183000  | 0.001199000  |

|   |              |              |              |
|---|--------------|--------------|--------------|
| C | 1.210667000  | 4.674350000  | 0.002070000  |
| C | 0.000000000  | 5.367655000  | 0.002528000  |
| C | -1.210667000 | 4.674350000  | 0.002071000  |
| C | 0.000000000  | 2.552945000  | 0.000800000  |
| C | -1.220596000 | 3.258183000  | 0.001200000  |
| C | -2.437886000 | 2.534291000  | 0.000606000  |
| C | -3.450426000 | 1.853661000  | 0.000276000  |
| C | -4.569346000 | 1.003384000  | -0.000662000 |
| C | -5.886726000 | 1.528273000  | -0.003634000 |
| C | -6.978271000 | 0.686118000  | -0.005820000 |
| C | -4.405674000 | -0.417800000 | -0.001909000 |
| C | -5.549041000 | -1.203815000 | -0.004422000 |
| C | 7.993387000  | -1.557044000 | 0.038141000  |
| C | -7.993388000 | -1.557043000 | 0.038139000  |
| H | 5.497706000  | -2.289046000 | -0.005647000 |
| H | 6.046445000  | 2.602865000  | -0.006843000 |
| H | 8.002717000  | 1.043842000  | -0.007014000 |
| H | 2.155569000  | 5.212166000  | 0.002364000  |
| H | 0.000000000  | 6.455335000  | 0.003194000  |
| H | -2.155569000 | 5.212165000  | 0.002365000  |
| H | -6.046444000 | 2.602865000  | -0.006841000 |
| H | -8.002717000 | 1.043842000  | -0.007013000 |
| H | -5.497706000 | -2.289046000 | -0.005648000 |
| H | 8.369242000  | -1.615116000 | 1.065630000  |
| H | 8.768993000  | -1.154156000 | -0.618693000 |
| H | 7.706005000  | -2.552825000 | -0.305412000 |
| H | -8.369261000 | -1.615095000 | 1.065623000  |
| H | -7.706000000 | -2.552831000 | -0.305390000 |
| H | -8.768983000 | -1.154168000 | -0.618717000 |
| H | 0.000000000  | 1.465952000  | 0.000006000  |

**2c...Cl<sup>-</sup>**

|    |              |              |              |
|----|--------------|--------------|--------------|
| I  | -2.567577000 | 1.480376000  | -0.004104000 |
| I  | 2.567577000  | 1.480376000  | -0.004104000 |
| Cl | 0.000000000  | 2.795175000  | -0.006293000 |
| N  | -6.886426000 | 0.617339000  | -0.009347000 |
| N  | 6.886426000  | 0.617339000  | -0.009347000 |
| C  | -5.646841000 | 1.196680000  | -0.005742000 |
| C  | -4.482034000 | 0.450937000  | -0.002315000 |
| C  | -4.584525000 | -0.978920000 | -0.000484000 |
| C  | -5.888705000 | -1.546695000 | -0.004141000 |
| C  | -7.006826000 | -0.743908000 | -0.007122000 |

|   |              |              |              |
|---|--------------|--------------|--------------|
| C | -3.447285000 | -1.794320000 | 0.001073000  |
| C | -2.449235000 | -2.505830000 | 0.001335000  |
| C | -1.238291000 | -3.214063000 | 0.001719000  |
| C | -1.205701000 | -4.624895000 | 0.001137000  |
| C | 0.000000000  | -5.326302000 | 0.000971000  |
| C | 1.205701000  | -4.624895000 | 0.001137000  |
| C | 0.000000000  | -2.469665000 | 0.002370000  |
| C | 1.238291000  | -3.214063000 | 0.001719000  |
| C | 2.449235000  | -2.505830000 | 0.001334000  |
| C | 3.447285000  | -1.794320000 | 0.001073000  |
| C | 4.584525000  | -0.978920000 | -0.000485000 |
| C | 5.888705000  | -1.546695000 | -0.004141000 |
| C | 7.006826000  | -0.743908000 | -0.007122000 |
| C | 4.482034000  | 0.450937000  | -0.002315000 |
| C | 5.646841000  | 1.196681000  | -0.005742000 |
| C | -8.102118000 | 1.465299000  | 0.043371000  |
| C | 8.102118000  | 1.465299000  | 0.043371000  |
| H | -5.634776000 | 2.282972000  | -0.007187000 |
| H | -6.011601000 | -2.625990000 | -0.007563000 |
| H | -8.017117000 | -1.140087000 | -0.008565000 |
| H | -2.152302000 | -5.160397000 | 0.000750000  |
| H | 0.000000000  | -6.412881000 | 0.000527000  |
| H | 2.152302000  | -5.160397000 | 0.000750000  |
| H | 6.011601000  | -2.625990000 | -0.007564000 |
| H | 8.017117000  | -1.140087000 | -0.008566000 |
| H | 5.634776000  | 2.282972000  | -0.007187000 |
| H | -8.422334000 | 1.588599000  | 1.084215000  |
| H | -8.898155000 | 0.988776000  | -0.534594000 |
| H | -7.874720000 | 2.442116000  | -0.389416000 |
| H | 8.422333000  | 1.588600000  | 1.084216000  |
| H | 7.874720000  | 2.442116000  | -0.389416000 |
| H | 8.898155000  | 0.988776000  | -0.534593000 |
| N | 0.000000000  | -1.129304000 | 0.003636000  |
| H | 0.867685000  | -0.595099000 | 0.002787000  |
| H | -0.867685000 | -0.595099000 | 0.002787000  |

**2c...I'**

|   |              |              |             |
|---|--------------|--------------|-------------|
| I | -2.735552000 | -1.160856000 | 0.002330000 |
| I | 2.735551000  | -1.160856000 | 0.002328000 |
| I | 0.000002000  | -2.872732000 | 0.008329000 |
| N | -7.028137000 | -0.098171000 | 0.004127000 |
| N | 7.028136000  | -0.098170000 | 0.004128000 |

|   |              |              |              |
|---|--------------|--------------|--------------|
| C | -5.813937000 | -0.730011000 | 0.001075000  |
| C | -4.620643000 | -0.033495000 | -0.000277000 |
| C | -4.659656000 | 1.396926000  | -0.000084000 |
| C | -5.937837000 | 2.021592000  | 0.003900000  |
| C | -7.089296000 | 1.267074000  | 0.004356000  |
| C | -3.486621000 | 2.159891000  | -0.000154000 |
| C | -2.456177000 | 2.822437000  | 0.000773000  |
| C | -1.236031000 | 3.514619000  | 0.001396000  |
| C | -1.203937000 | 4.926067000  | 0.002905000  |
| C | 0.000000000  | 5.628996000  | 0.003626000  |
| C | 1.203937000  | 4.926066000  | 0.002904000  |
| C | -0.000001000 | 2.767998000  | 0.000601000  |
| C | 1.236029000  | 3.514619000  | 0.001396000  |
| C | 2.456175000  | 2.822436000  | 0.000772000  |
| C | 3.486621000  | 2.159893000  | -0.000154000 |
| C | 4.659656000  | 1.396928000  | -0.000082000 |
| C | 5.937837000  | 2.021594000  | 0.003912000  |
| C | 7.089296000  | 1.267076000  | 0.004366000  |
| C | 4.620642000  | -0.033493000 | -0.000280000 |
| C | 5.813935000  | -0.730009000 | 0.001070000  |
| C | -8.279828000 | -0.892098000 | -0.050652000 |
| C | 8.279827000  | -0.892096000 | -0.050657000 |
| H | -5.848312000 | -1.816086000 | 0.001252000  |
| H | -6.014610000 | 3.105240000  | 0.009274000  |
| H | -8.081622000 | 1.706431000  | 0.005569000  |
| H | -2.151631000 | 5.459569000  | 0.003499000  |
| H | 0.000000000  | 6.715564000  | 0.004788000  |
| H | 2.151631000  | 5.459568000  | 0.003496000  |
| H | 6.014611000  | 3.105241000  | 0.009294000  |
| H | 8.081622000  | 1.706431000  | 0.005587000  |
| H | 5.848311000  | -1.816085000 | 0.001241000  |
| H | -8.612516000 | -0.986870000 | -1.090557000 |
| H | -9.050484000 | -0.390156000 | 0.540173000  |
| H | -8.091336000 | -1.883776000 | 0.366661000  |
| H | 8.091329000  | -1.883787000 | 0.366622000  |
| H | 9.050475000  | -0.390172000 | 0.540195000  |
| H | 8.612531000  | -0.986836000 | -1.090561000 |
| N | -0.000003000 | 1.424713000  | -0.000893000 |
| H | 0.868388000  | 0.892304000  | -0.000347000 |
| H | -0.868394000 | 0.892306000  | -0.000346000 |

## 2d...Cl-

|    |              |              |              |
|----|--------------|--------------|--------------|
| I  | -2.589058000 | -1.349343000 | -0.007568000 |
| I  | 2.589115000  | -1.349311000 | -0.007554000 |
| Cl | -0.000161000 | -2.658428000 | -0.042572000 |
| N  | -6.930166000 | -0.438558000 | 0.016702000  |
| N  | 6.930165000  | -0.438570000 | 0.016703000  |
| C  | -5.704371000 | -1.076707000 | 0.011331000  |
| C  | -4.510235000 | -0.317831000 | 0.008052000  |
| C  | -4.583064000 | 1.090307000  | 0.006945000  |
| C  | -5.875487000 | 1.709180000  | 0.005184000  |
| C  | -6.999889000 | 0.939393000  | 0.009061000  |
| C  | -3.431769000 | 1.895864000  | 0.002162000  |
| C  | -2.446785000 | 2.623352000  | -0.001959000 |
| C  | -1.237022000 | 3.340369000  | -0.005299000 |
| C  | -1.206181000 | 4.750529000  | -0.010605000 |
| C  | 0.000019000  | 5.451807000  | -0.013278000 |
| C  | 1.206199000  | 4.750511000  | -0.010633000 |
| C  | -0.000014000 | 2.600483000  | -0.002797000 |
| C  | 1.237011000  | 3.340344000  | -0.005329000 |
| C  | 2.446756000  | 2.623310000  | -0.002029000 |
| C  | 3.431757000  | 1.895839000  | 0.002119000  |
| C  | 4.583051000  | 1.090297000  | 0.006922000  |
| C  | 5.875476000  | 1.709163000  | 0.005145000  |
| C  | 6.999879000  | 0.939380000  | 0.009033000  |
| C  | 4.510242000  | -0.317850000 | 0.008051000  |
| C  | 5.704375000  | -1.076729000 | 0.011341000  |
| C  | -8.178617000 | -1.226625000 | 0.043606000  |
| C  | 8.178620000  | -1.226632000 | 0.043635000  |
| H  | -5.962351000 | 2.790932000  | 0.000461000  |
| H  | -8.000916000 | 1.356418000  | 0.008141000  |
| H  | -2.152876000 | 5.285948000  | -0.012430000 |
| H  | 0.000027000  | 6.538468000  | -0.017263000 |
| H  | 2.152907000  | 5.285909000  | -0.012481000 |
| H  | 5.962337000  | 2.790916000  | 0.000399000  |
| H  | 8.000903000  | 1.356412000  | 0.008102000  |
| H  | -8.271088000 | -1.830766000 | -0.867973000 |
| H  | -9.024769000 | -0.539702000 | 0.093818000  |
| H  | -8.194989000 | -1.876405000 | 0.926684000  |
| H  | 8.271121000  | -1.830767000 | -0.867945000 |
| H  | 8.194969000  | -1.876415000 | 0.926709000  |
| H  | 9.024766000  | -0.539703000 | 0.093874000  |
| N  | -0.000034000 | 1.256151000  | 0.002430000  |



|   |              |              |              |
|---|--------------|--------------|--------------|
| H | 0.867706000  | 0.727262000  | -0.000103000 |
| H | -0.867792000 | 0.727285000  | -0.000076000 |
| N | 5.690541000  | -2.434498000 | 0.043994000  |
| H | 4.783028000  | -2.889007000 | -0.027317000 |
| H | 6.511945000  | -2.991398000 | -0.145236000 |
| N | -5.690514000 | -2.434473000 | 0.043942000  |
| H | -4.782991000 | -2.888969000 | -0.027337000 |
| H | -6.511923000 | -2.991402000 | -0.145169000 |

**2e<sup>-</sup>Cl<sup>-</sup>**

|    |              |              |              |
|----|--------------|--------------|--------------|
| I  | 2.566867000  | -1.086340000 | 0.000029000  |
| I  | -2.566873000 | -1.086337000 | 0.000024000  |
| Cl | -0.000001000 | -2.330130000 | 0.000079000  |
| N  | 6.928768000  | -0.193626000 | -0.000045000 |
| N  | -6.928767000 | -0.193632000 | -0.000041000 |
| C  | 5.685443000  | -0.765881000 | -0.000022000 |
| C  | 4.498318000  | -0.066483000 | -0.000004000 |
| C  | 4.589206000  | 1.366986000  | -0.000009000 |
| C  | 5.884607000  | 1.955105000  | -0.000028000 |
| C  | 7.015133000  | 1.172828000  | -0.000047000 |
| C  | 3.444410000  | 2.168745000  | 0.000001000  |
| C  | 2.448421000  | 2.884132000  | 0.000007000  |
| C  | 1.238987000  | 3.592377000  | 0.000011000  |
| C  | 1.205928000  | 5.003553000  | 0.000010000  |
| C  | -0.000001000 | 5.704483000  | 0.000011000  |
| C  | -1.205930000 | 5.003552000  | 0.000010000  |
| C  | 0.000000000  | 2.847813000  | 0.000013000  |
| C  | -1.238989000 | 3.592376000  | 0.000011000  |
| C  | -2.448423000 | 2.884131000  | 0.000007000  |
| C  | -3.444415000 | 2.168748000  | 0.000001000  |
| C  | -4.589209000 | 1.366988000  | -0.000009000 |
| C  | -5.884612000 | 1.955102000  | -0.000018000 |
| C  | -7.015136000 | 1.172822000  | -0.000033000 |
| C  | -4.498319000 | -0.066480000 | -0.000009000 |
| C  | -5.685440000 | -0.765882000 | -0.000028000 |
| C  | 8.164810000  | -1.023217000 | -0.000099000 |
| C  | -8.164806000 | -1.023227000 | -0.000063000 |
| H  | 5.990522000  | 3.035909000  | -0.000028000 |
| H  | 8.017853000  | 1.586040000  | -0.000063000 |
| H  | 2.152118000  | 5.539696000  | 0.000009000  |
| H  | -0.000002000 | 6.791001000  | 0.000011000  |
| H  | -2.152121000 | 5.539695000  | 0.000009000  |

|   |              |              |              |
|---|--------------|--------------|--------------|
| H | -5.990532000 | 3.035905000  | -0.000013000 |
| H | -8.017857000 | 1.586030000  | -0.000039000 |
| H | 8.184291000  | -1.650001000 | 0.896541000  |
| H | 9.024514000  | -0.352162000 | -0.000004000 |
| H | 8.184334000  | -1.649817000 | -0.896868000 |
| H | -8.184311000 | -1.649937000 | 0.896629000  |
| H | -8.184301000 | -1.649902000 | -0.896781000 |
| H | -9.024512000 | -0.352175000 | -0.000054000 |
| N | 0.000001000  | 1.508922000  | 0.000016000  |
| H | -0.867893000 | 0.974917000  | 0.000021000  |
| H | 0.867895000  | 0.974919000  | 0.000021000  |
| N | -5.696063000 | -2.266886000 | -0.000034000 |
| O | -5.710376000 | -2.808830000 | -1.106279000 |
| O | -5.710300000 | -2.808842000 | 1.106205000  |
| N | 5.696078000  | -2.266885000 | -0.000022000 |
| O | 5.710327000  | -2.808834000 | -1.106265000 |
| O | 5.710393000  | -2.808836000 | 1.106220000  |

2f...Cl<sup>-</sup>

|    |              |              |              |
|----|--------------|--------------|--------------|
| I  | 2.568790000  | -1.554755000 | -0.000304000 |
| I  | -2.568646000 | -1.554776000 | 0.000230000  |
| Cl | -0.000388000 | -2.881111000 | -0.000456000 |
| N  | 6.904642000  | -0.675257000 | 0.003237000  |
| N  | -6.904607000 | -0.675256000 | -0.002848000 |
| C  | 5.647051000  | -1.253531000 | 0.000664000  |
| C  | 4.488505000  | -0.522468000 | -0.001583000 |
| C  | 4.596595000  | 0.913412000  | -0.006175000 |
| C  | 5.882865000  | 1.484496000  | -0.018909000 |
| C  | 7.035395000  | 0.693166000  | -0.013966000 |
| C  | 3.453053000  | 1.726185000  | -0.006582000 |
| C  | 2.451031000  | 2.430294000  | -0.005156000 |
| C  | 1.237434000  | 3.137741000  | -0.002658000 |
| C  | 1.205314000  | 4.547985000  | -0.002516000 |
| C  | 0.000020000  | 5.250248000  | -0.000049000 |
| C  | -1.205299000 | 4.547995000  | 0.002464000  |
| C  | -0.000004000 | 2.393323000  | 0.000028000  |
| C  | -1.237427000 | 3.137757000  | 0.002688000  |
| C  | -2.451097000 | 2.430408000  | 0.005205000  |
| C  | -3.453130000 | 1.726328000  | 0.006591000  |
| C  | -4.596668000 | 0.913526000  | 0.006196000  |
| C  | -5.882957000 | 1.484555000  | 0.018712000  |
| C  | -7.035443000 | 0.693160000  | 0.013921000  |

|   |              |              |              |
|---|--------------|--------------|--------------|
| C | -4.488452000 | -0.522346000 | 0.001896000  |
| C | -5.646982000 | -1.253454000 | -0.000126000 |
| C | 8.102548000  | -1.538341000 | 0.039900000  |
| C | -8.102465000 | -1.538420000 | -0.039157000 |
| H | 5.646654000  | -2.339185000 | 0.003612000  |
| H | 5.994819000  | 2.565569000  | -0.034090000 |
| H | 2.152307000  | 5.082967000  | -0.004304000 |
| H | 0.000025000  | 6.336900000  | -0.000048000 |
| H | -2.152276000 | 5.083002000  | 0.004232000  |
| H | -5.994972000 | 2.565627000  | 0.033602000  |
| H | -5.646538000 | -2.339112000 | -0.002736000 |
| H | 8.724555000  | -1.278622000 | 0.904140000  |
| H | 8.683140000  | -1.431499000 | -0.885557000 |
| H | 7.779831000  | -2.576520000 | 0.130562000  |
| H | -7.779691000 | -2.576612000 | -0.129463000 |
| H | -8.724519000 | -1.279059000 | -0.903472000 |
| H | -8.683028000 | -1.431268000 | 0.886281000  |
| N | -0.000013000 | 1.052208000  | 0.000045000  |
| H | -0.867573000 | 0.517678000  | 0.001768000  |
| H | 0.867544000  | 0.517687000  | -0.001183000 |
| N | -8.296792000 | 1.233769000  | -0.038584000 |
| H | -8.365800000 | 2.236293000  | 0.093796000  |
| H | -9.091172000 | 0.708208000  | 0.305536000  |
| N | 8.296708000  | 1.233862000  | 0.038265000  |
| H | 8.365669000  | 2.236347000  | -0.094439000 |
| H | 9.091113000  | 0.708214000  | -0.305660000 |

2g...Cl<sup>-</sup>

|    |              |              |              |
|----|--------------|--------------|--------------|
| I  | -2.568314000 | -1.678353000 | -0.024889000 |
| I  | 2.568316000  | -1.678496000 | -0.025122000 |
| Cl | 0.000125000  | -2.971272000 | -0.047944000 |
| N  | -6.898295000 | -0.839395000 | -0.009123000 |
| N  | 6.898321000  | -0.839333000 | -0.009227000 |
| C  | -5.644686000 | -1.396425000 | -0.030348000 |
| C  | -4.478064000 | -0.653283000 | -0.015994000 |
| C  | -4.577601000 | 0.777234000  | -0.010387000 |
| C  | -5.879835000 | 1.339345000  | -0.012528000 |
| C  | -6.992370000 | 0.527841000  | 0.006484000  |
| C  | -3.445483000 | 1.596332000  | -0.006896000 |
| C  | -2.447823000 | 2.309211000  | -0.006762000 |
| C  | -1.238986000 | 3.017652000  | -0.006312000 |
| C  | -1.206185000 | 4.429018000  | -0.008986000 |

|   |              |              |              |
|---|--------------|--------------|--------------|
| C | -0.000016000 | 5.129540000  | -0.009939000 |
| C | 1.206158000  | 4.429011000  | -0.008857000 |
| C | -0.000012000 | 2.273099000  | -0.003872000 |
| C | 1.238960000  | 3.017655000  | -0.006189000 |
| C | 2.447796000  | 2.309200000  | -0.006540000 |
| C | 3.445422000  | 1.596278000  | -0.006741000 |
| C | 4.577558000  | 0.777189000  | -0.010332000 |
| C | 5.879764000  | 1.339360000  | -0.012355000 |
| C | 6.992343000  | 0.527905000  | 0.006567000  |
| C | 4.478071000  | -0.653328000 | -0.016136000 |
| C | 5.644734000  | -1.396406000 | -0.030559000 |
| C | -8.080720000 | -1.749908000 | -0.068978000 |
| C | 8.080778000  | -1.749803000 | -0.069139000 |
| H | -5.626753000 | -2.481365000 | -0.068898000 |
| H | -6.024935000 | 2.414853000  | -0.018308000 |
| H | -2.152283000 | 4.965252000  | -0.010771000 |
| H | -0.000012000 | 6.216037000  | -0.012259000 |
| H | 2.152254000  | 4.965250000  | -0.010533000 |
| H | 6.024818000  | 2.414873000  | -0.017972000 |
| H | 5.626849000  | -2.481343000 | -0.069251000 |
| H | -8.796109000 | -1.382248000 | -0.807667000 |
| H | -8.560895000 | -1.800167000 | 0.910076000  |
| H | -7.715252000 | -2.732830000 | -0.371264000 |
| H | 7.715343000  | -2.732708000 | -0.371517000 |
| H | 8.560932000  | -1.800130000 | 0.909922000  |
| H | 8.796178000  | -1.382055000 | -0.807772000 |
| N | -0.000004000 | 0.933578000  | 0.001170000  |
| H | 0.867770000  | 0.399478000  | -0.000993000 |
| H | -0.867770000 | 0.399466000  | -0.001081000 |
| N | 8.332352000  | 1.169660000  | 0.102756000  |
| O | 9.178257000  | 0.610899000  | 0.814426000  |
| O | 8.470878000  | 2.233192000  | -0.507612000 |
| N | -8.332410000 | 1.169553000  | 0.102576000  |
| O | -9.178279000 | 0.610859000  | 0.814337000  |
| O | -8.470977000 | 2.232990000  | -0.507944000 |

2h...Cl-

|    |              |              |              |
|----|--------------|--------------|--------------|
| I  | -2.558309000 | -1.647276000 | 0.000541000  |
| I  | 2.558309000  | -1.647274000 | 0.000546000  |
| Cl | -0.000001000 | -2.984799000 | 0.016153000  |
| N  | -6.860575000 | -0.778408000 | -0.009865000 |
| N  | 6.860574000  | -0.778410000 | -0.009863000 |

|   |              |              |              |
|---|--------------|--------------|--------------|
| C | -5.637006000 | -1.371983000 | -0.012836000 |
| C | -4.472109000 | -0.614696000 | -0.005394000 |
| C | -4.561744000 | 0.800059000  | 0.001746000  |
| C | -5.868700000 | 1.409883000  | 0.003613000  |
| C | -6.991493000 | 0.579480000  | -0.000050000 |
| C | -3.424141000 | 1.620396000  | 0.009048000  |
| C | -2.448187000 | 2.362519000  | 0.006795000  |
| C | -1.237048000 | 3.076555000  | 0.002627000  |
| C | -1.205121000 | 4.486294000  | -0.014318000 |
| C | 0.000000000  | 5.188516000  | -0.022336000 |
| C | 1.205121000  | 4.486295000  | -0.014319000 |
| C | 0.000001000  | 2.332239000  | 0.011961000  |
| C | 1.237049000  | 3.076556000  | 0.002625000  |
| C | 2.448188000  | 2.362520000  | 0.006791000  |
| C | 3.424141000  | 1.620396000  | 0.009043000  |
| C | 4.561744000  | 0.800059000  | 0.001743000  |
| C | 5.868701000  | 1.409883000  | 0.003607000  |
| C | 6.991494000  | 0.579478000  | -0.000055000 |
| C | 4.472108000  | -0.614695000 | -0.005390000 |
| C | 5.637005000  | -1.371985000 | -0.012830000 |
| C | -8.092039000 | -1.605739000 | -0.019382000 |
| C | 8.092038000  | -1.605742000 | -0.019378000 |
| H | -5.627620000 | -2.456711000 | -0.019856000 |
| H | -8.004588000 | 0.968701000  | -0.001175000 |
| H | -2.150547000 | 5.024092000  | -0.023483000 |
| H | -0.000001000 | 6.275029000  | -0.036346000 |
| H | 2.150546000  | 5.024093000  | -0.023485000 |
| H | 8.004590000  | 0.968698000  | -0.001180000 |
| H | 5.627618000  | -2.456712000 | -0.019844000 |
| H | -8.671976000 | -1.386219000 | -0.921828000 |
| H | -8.689457000 | -1.380728000 | 0.870123000  |
| H | -7.809954000 | -2.659852000 | -0.013205000 |
| H | 7.809952000  | -2.659854000 | -0.013193000 |
| H | 8.689458000  | -1.380725000 | 0.870123000  |
| H | 8.671971000  | -1.386228000 | -0.921828000 |
| N | 0.000001000  | 0.989610000  | 0.028360000  |
| H | 0.866838000  | 0.454637000  | 0.027862000  |
| H | -0.866835000 | 0.454636000  | 0.027863000  |
| N | 5.991859000  | 2.771574000  | -0.026889000 |
| H | 5.161680000  | 3.329916000  | 0.136844000  |
| H | 6.885474000  | 3.210356000  | 0.154809000  |
| N | -5.991859000 | 2.771580000  | -0.026899000 |

|   |              |             |             |
|---|--------------|-------------|-------------|
| H | -5.161682000 | 3.329905000 | 0.136918000 |
| H | -6.885464000 | 3.210344000 | 0.154903000 |

2i...Cl-

|    |              |              |              |
|----|--------------|--------------|--------------|
| I  | 2.598068000  | -1.878361000 | -0.014574000 |
| I  | -2.598032000 | -1.878307000 | -0.014579000 |
| Cl | 0.000052000  | -3.132872000 | -0.018106000 |
| N  | 6.926857000  | -1.099265000 | 0.026366000  |
| N  | -6.926828000 | -1.099338000 | 0.026427000  |
| C  | 5.664300000  | -1.645485000 | 0.006271000  |
| C  | 4.526436000  | -0.869365000 | -0.003313000 |
| C  | 4.645194000  | 0.571813000  | -0.004323000 |
| C  | 5.980665000  | 1.078002000  | 0.019362000  |
| C  | 7.083549000  | 0.244231000  | 0.039546000  |
| C  | 3.506148000  | 1.369298000  | -0.008028000 |
| C  | 2.452037000  | 1.998222000  | -0.008113000 |
| C  | 1.241066000  | 2.693971000  | -0.013288000 |
| C  | 1.207345000  | 4.106949000  | -0.035301000 |
| C  | -0.000036000 | 4.806096000  | -0.045247000 |
| C  | -1.207397000 | 4.106927000  | -0.035309000 |
| C  | 0.000001000  | 1.950610000  | -0.000046000 |
| C  | -1.241079000 | 2.693939000  | -0.013294000 |
| C  | -2.452036000 | 1.998174000  | -0.008102000 |
| C  | -3.506186000 | 1.369310000  | -0.008006000 |
| C  | -4.645219000 | 0.571815000  | -0.004306000 |
| C  | -5.980709000 | 1.077966000  | 0.019366000  |
| C  | -7.083564000 | 0.244149000  | 0.039549000  |
| C  | -4.526417000 | -0.869364000 | -0.003287000 |
| C  | -5.664254000 | -1.645518000 | 0.006344000  |
| C  | 8.107931000  | -2.000361000 | 0.024145000  |
| C  | -8.107871000 | -2.000474000 | 0.024252000  |
| H  | 5.624773000  | -2.731043000 | -0.000027000 |
| H  | 8.089018000  | 0.647723000  | 0.067769000  |
| H  | 2.154990000  | 4.640480000  | -0.045351000 |
| H  | -0.000045000 | 5.892550000  | -0.062100000 |
| H  | -2.155055000 | 4.640433000  | -0.045349000 |
| H  | -8.089043000 | 0.647617000  | 0.067727000  |
| H  | -5.624689000 | -2.731075000 | 0.000100000  |
| H  | 8.042979000  | -2.681157000 | 0.878590000  |
| H  | 9.014694000  | -1.397955000 | 0.102161000  |
| H  | 8.124018000  | -2.574302000 | -0.908094000 |
| H  | -8.042857000 | -2.681274000 | 0.878689000  |

|   |              |              |              |
|---|--------------|--------------|--------------|
| H | -8.123979000 | -2.574410000 | -0.907990000 |
| H | -9.014650000 | -1.398099000 | 0.102313000  |
| N | 0.000021000  | 0.615859000  | 0.022219000  |
| H | -0.868701000 | 0.081538000  | 0.024335000  |
| H | 0.868754000  | 0.081558000  | 0.024342000  |
| N | -6.281434000 | 2.539438000  | 0.025749000  |
| O | -7.442141000 | 2.873267000  | 0.308593000  |
| O | -5.357735000 | 3.309250000  | -0.255087000 |
| N | 6.281329000  | 2.539487000  | 0.025770000  |
| O | 7.441864000  | 2.873369000  | 0.309256000  |
| O | 5.357758000  | 3.309231000  | -0.255654000 |

2j...Cl-

|    |              |              |              |
|----|--------------|--------------|--------------|
| I  | 2.578106000  | -1.748852000 | -0.004827000 |
| I  | -2.578106000 | -1.748860000 | -0.003530000 |
| Cl | 0.000012000  | -3.059261000 | -0.003937000 |
| N  | 6.900850000  | -0.903895000 | -0.011767000 |
| N  | -6.900836000 | -0.903880000 | -0.013668000 |
| C  | 5.653266000  | -1.475535000 | -0.007287000 |
| C  | 4.495645000  | -0.726032000 | -0.003762000 |
| C  | 4.598452000  | 0.708885000  | -0.001953000 |
| C  | 5.912138000  | 1.265763000  | -0.005690000 |
| C  | 7.024129000  | 0.458159000  | -0.008509000 |
| C  | 3.467516000  | 1.519856000  | -0.000398000 |
| C  | 2.444189000  | 2.206186000  | 0.000228000  |
| C  | 1.244234000  | 2.903030000  | 0.001707000  |
| C  | 1.218313000  | 4.345610000  | 0.001028000  |
| C  | -0.000011000 | 5.036786000  | 0.001390000  |
| C  | -1.218316000 | 4.345603000  | 0.002100000  |
| C  | 0.000003000  | 2.180065000  | 0.003308000  |
| C  | -1.244231000 | 2.903027000  | 0.003078000  |
| C  | -2.444182000 | 2.206176000  | 0.003374000  |
| C  | -3.467503000 | 1.519836000  | 0.003282000  |
| C  | -4.598440000 | 0.708874000  | -0.000070000 |
| C  | -5.912115000 | 1.265768000  | -0.005535000 |
| C  | -7.024107000 | 0.458175000  | -0.010173000 |
| C  | -4.495643000 | -0.726041000 | -0.002660000 |
| C  | -5.653264000 | -1.475534000 | -0.007940000 |
| C  | 8.106121000  | -1.761708000 | 0.047945000  |
| C  | -8.106194000 | -1.761697000 | 0.044144000  |
| H  | 5.635290000  | -2.561819000 | -0.008519000 |
| H  | 6.046542000  | 2.343679000  | -0.009313000 |

|   |              |              |              |
|---|--------------|--------------|--------------|
| H | 8.035670000  | 0.851221000  | -0.009530000 |
| H | -0.000015000 | 6.125305000  | 0.000743000  |
| H | -6.046495000 | 2.343685000  | -0.009638000 |
| H | -8.035641000 | 0.851246000  | -0.012702000 |
| H | -5.635293000 | -2.561817000 | -0.009756000 |
| H | 8.363071000  | -1.974492000 | 1.092321000  |
| H | 8.938605000  | -1.246573000 | -0.438001000 |
| H | 7.905692000  | -2.698637000 | -0.477960000 |
| H | -8.364556000 | -1.974824000 | 1.088102000  |
| H | -7.905071000 | -2.698455000 | -0.481800000 |
| H | -8.938016000 | -1.246391000 | -0.442755000 |
| N | 0.000005000  | 0.840405000  | 0.005012000  |
| H | -0.867556000 | 0.305870000  | 0.004253000  |
| H | 0.867566000  | 0.305870000  | 0.004175000  |
| N | -2.399578000 | 5.019744000  | -0.004926000 |
| H | -2.424273000 | 6.029596000  | 0.027995000  |
| H | -3.275076000 | 4.513337000  | 0.027595000  |
| N | 2.399542000  | 5.019751000  | 0.006198000  |
| H | 2.424313000  | 6.029658000  | -0.024624000 |
| H | 3.275158000  | 4.513327000  | -0.022291000 |

**2k...Cl<sup>-</sup>**

|    |              |              |              |
|----|--------------|--------------|--------------|
| I  | 2.526470000  | -2.260771000 | 0.028604000  |
| I  | -2.526473000 | -2.260770000 | 0.028607000  |
| Cl | 0.000006000  | -3.615620000 | 0.081909000  |
| N  | 6.839636000  | -1.349531000 | -0.030917000 |
| N  | -6.839635000 | -1.349532000 | -0.030919000 |
| C  | 5.613878000  | -1.950067000 | -0.013826000 |
| C  | 4.435065000  | -1.220088000 | -0.004123000 |
| C  | 4.523153000  | 0.205179000  | -0.013231000 |
| C  | 5.812347000  | 0.800462000  | -0.031453000 |
| C  | 6.942948000  | 0.013313000  | -0.040555000 |
| C  | 3.376728000  | 1.014439000  | -0.005620000 |
| C  | 2.438755000  | 1.798406000  | -0.018144000 |
| C  | 1.248699000  | 2.539895000  | -0.020739000 |
| C  | 1.192830000  | 3.951265000  | -0.007835000 |
| C  | 0.000000000  | 4.662408000  | 0.020539000  |
| C  | -1.192830000 | 3.951265000  | -0.007836000 |
| C  | 0.000000000  | 1.808407000  | 0.000909000  |
| C  | -1.248699000 | 2.539895000  | -0.020739000 |
| C  | -2.438754000 | 1.798406000  | -0.018145000 |
| C  | -3.376727000 | 1.014439000  | -0.005621000 |



|   |              |              |              |
|---|--------------|--------------|--------------|
| C | -4.523152000 | 0.205178000  | -0.013232000 |
| C | -5.812346000 | 0.800461000  | -0.031459000 |
| C | -6.942947000 | 0.013313000  | -0.040561000 |
| C | -4.435065000 | -1.220088000 | -0.004121000 |
| C | -5.613877000 | -1.950068000 | -0.013824000 |
| C | 8.075284000  | -2.172234000 | -0.080140000 |
| C | -8.075285000 | -2.172232000 | -0.080133000 |
| H | 5.619012000  | -3.036309000 | -0.006829000 |
| H | 5.911398000  | 1.882485000  | -0.038825000 |
| H | 7.948075000  | 0.422325000  | -0.056421000 |
| H | 0.000000000  | 5.745549000  | 0.060693000  |
| H | -5.911398000 | 1.882485000  | -0.038835000 |
| H | -7.948074000 | 0.422324000  | -0.056432000 |
| H | -5.619011000 | -3.036310000 | -0.006823000 |
| H | 7.830068000  | -3.199219000 | 0.197195000  |
| H | 8.805586000  | -1.767290000 | 0.625932000  |
| H | 8.487520000  | -2.151888000 | -1.094881000 |
| H | -7.830056000 | -3.199234000 | 0.197124000  |
| H | -8.487572000 | -2.151821000 | -1.094852000 |
| H | -8.805553000 | -1.767334000 | 0.626000000  |
| N | 0.000000000  | 0.468365000  | 0.034583000  |
| H | -0.869230000 | -0.064120000 | 0.039913000  |
| H | 0.869231000  | -0.064120000 | 0.039913000  |
| N | -2.454633000 | 4.749506000  | -0.016827000 |
| O | -3.460572000 | 4.224128000  | -0.516040000 |
| O | -2.403049000 | 5.883358000  | 0.472797000  |
| N | 2.454634000  | 4.749506000  | -0.016824000 |
| O | 3.460571000  | 4.224131000  | -0.516043000 |
| O | 2.403050000  | 5.883354000  | 0.472807000  |

## 2|...Cl-

|    |              |              |              |
|----|--------------|--------------|--------------|
| I  | 2.564711000  | -1.665663000 | -0.013918000 |
| I  | -2.564712000 | -1.665664000 | -0.013919000 |
| Cl | 0.000001000  | -2.990263000 | -0.040535000 |
| N  | 6.882275000  | -0.798578000 | 0.017336000  |
| N  | -6.882276000 | -0.798577000 | 0.017336000  |
| C  | 5.641525000  | -1.378390000 | 0.010591000  |
| C  | 4.477274000  | -0.633454000 | 0.004303000  |
| C  | 4.577586000  | 0.797531000  | 0.007339000  |
| C  | 5.882998000  | 1.365324000  | 0.014513000  |
| C  | 7.001111000  | 0.563685000  | 0.020961000  |
| C  | 3.441242000  | 1.612415000  | 0.000611000  |

|   |              |              |              |
|---|--------------|--------------|--------------|
| C | 2.444517000  | 2.326819000  | -0.003683000 |
| C | 1.233609000  | 3.033522000  | -0.006066000 |
| C | 1.204714000  | 4.442426000  | -0.007882000 |
| C | 0.000000000  | 5.165389000  | -0.009273000 |
| C | -1.204714000 | 4.442427000  | -0.007881000 |
| C | 0.000000000  | 2.283578000  | -0.005821000 |
| C | -1.233608000 | 3.033521000  | -0.006065000 |
| C | -2.444516000 | 2.326818000  | -0.003682000 |
| C | -3.441241000 | 1.612414000  | 0.000613000  |
| C | -4.577585000 | 0.797531000  | 0.007341000  |
| C | -5.882997000 | 1.365325000  | 0.014516000  |
| C | -7.001110000 | 0.563686000  | 0.020964000  |
| C | -4.477275000 | -0.633455000 | 0.004302000  |
| C | -5.641526000 | -1.378390000 | 0.010589000  |
| C | 8.096372000  | -1.646212000 | 0.082925000  |
| C | -8.096373000 | -1.646210000 | 0.082924000  |
| H | 5.629927000  | -2.464679000 | 0.008962000  |
| H | 6.005704000  | 2.444648000  | 0.012530000  |
| H | 8.011061000  | 0.960637000  | 0.028402000  |
| H | 2.154197000  | 4.974536000  | -0.002602000 |
| H | -2.154198000 | 4.974535000  | -0.002601000 |
| H | -6.005702000 | 2.444648000  | 0.012536000  |
| H | -8.011060000 | 0.960639000  | 0.028408000  |
| H | -5.629929000 | -2.464679000 | 0.008956000  |
| H | 8.396715000  | -1.784674000 | 1.127962000  |
| H | 8.903838000  | -1.161749000 | -0.472197000 |
| H | 7.878850000  | -2.617178000 | -0.368097000 |
| H | -8.396718000 | -1.784672000 | 1.127960000  |
| H | -7.878851000 | -2.617176000 | -0.368098000 |
| H | -8.903838000 | -1.161747000 | -0.472199000 |
| N | 0.000000000  | 0.941092000  | -0.005403000 |
| H | -0.867730000 | 0.407348000  | -0.006319000 |
| H | 0.867730000  | 0.407349000  | -0.006318000 |
| N | 0.000001000  | 6.559726000  | 0.059729000  |
| H | -0.844308000 | 7.026794000  | -0.254343000 |
| H | 0.844311000  | 7.026793000  | -0.254341000 |

**2m...Cl<sup>-</sup>**

|    |              |              |             |
|----|--------------|--------------|-------------|
| I  | 2.573657000  | -1.981472000 | 0.003491000 |
| I  | -2.573659000 | -1.981471000 | 0.003492000 |
| Cl | 0.000008000  | -3.275050000 | 0.005116000 |
| N  | 6.893759000  | -1.120080000 | 0.008780000 |

|   |              |              |              |
|---|--------------|--------------|--------------|
| N | -6.893758000 | -1.120083000 | 0.008777000  |
| C | 5.656844000  | -1.701349000 | 0.005434000  |
| C | 4.490046000  | -0.955846000 | 0.002225000  |
| C | 4.594205000  | 0.471840000  | 0.000768000  |
| C | 5.894899000  | 1.043041000  | 0.004254000  |
| C | 7.014342000  | 0.240572000  | 0.007133000  |
| C | 3.453134000  | 1.286820000  | -0.000551000 |
| C | 2.455052000  | 1.994873000  | -0.000836000 |
| C | 1.241394000  | 2.704848000  | -0.001245000 |
| C | 1.216684000  | 4.108314000  | -0.001004000 |
| C | -0.000001000 | 4.788554000  | -0.000996000 |
| C | -1.216685000 | 4.108313000  | -0.001003000 |
| C | 0.000001000  | 1.961146000  | -0.001648000 |
| C | -1.241393000 | 2.704847000  | -0.001244000 |
| C | -2.455051000 | 1.994870000  | -0.000834000 |
| C | -3.453132000 | 1.286818000  | -0.000546000 |
| C | -4.594204000 | 0.471838000  | 0.000772000  |
| C | -5.894898000 | 1.043038000  | 0.004256000  |
| C | -7.014341000 | 0.240569000  | 0.007132000  |
| C | -4.490045000 | -0.955849000 | 0.002225000  |
| C | -5.656843000 | -1.701352000 | 0.005431000  |
| C | 8.113337000  | -1.965137000 | -0.039316000 |
| C | -8.113338000 | -1.965138000 | -0.039318000 |
| H | 5.645963000  | -2.787608000 | 0.006674000  |
| H | 6.016181000  | 2.122557000  | 0.007476000  |
| H | 8.024462000  | 0.637205000  | 0.008678000  |
| H | 2.143687000  | 4.672932000  | -0.000782000 |
| H | -2.143689000 | 4.672929000  | -0.000780000 |
| H | -6.016180000 | 2.122554000  | 0.007479000  |
| H | -8.024461000 | 0.637202000  | 0.008676000  |
| H | -5.645962000 | -2.787611000 | 0.006670000  |
| H | 7.873924000  | -2.958177000 | 0.346888000  |
| H | 8.889988000  | -1.510642000 | 0.581311000  |
| H | 8.464133000  | -2.045763000 | -1.074240000 |
| H | -7.873912000 | -2.958194000 | 0.346834000  |
| H | -8.464165000 | -2.045718000 | -1.074235000 |
| H | -8.889970000 | -1.510670000 | 0.581353000  |
| N | 0.000002000  | 0.624290000  | -0.002393000 |
| H | -0.868251000 | 0.088858000  | -0.001771000 |
| H | 0.868257000  | 0.088859000  | -0.001772000 |
| N | -0.000002000 | 6.269989000  | -0.000830000 |
| O | 1.101734000  | 6.841282000  | -0.000773000 |

|           |              |              |              |
|-----------|--------------|--------------|--------------|
| O         | -1.101740000 | 6.841281000  | -0.000773000 |
| <b>2a</b> |              |              |              |
| Cl        | 3.391036000  | -2.195425000 | -0.006906000 |
| Cl        | -3.391032000 | -2.195428000 | -0.006888000 |
| N         | 7.213087000  | -1.135073000 | -0.012311000 |
| N         | -7.213084000 | -1.135081000 | -0.012311000 |
| C         | 6.054879000  | -1.852731000 | -0.008841000 |
| C         | 4.824670000  | -1.219735000 | -0.004115000 |
| C         | 4.738015000  | 0.206193000  | -0.000884000 |
| C         | 5.976124000  | 0.906564000  | -0.002736000 |
| C         | 7.175399000  | 0.230576000  | -0.007769000 |
| C         | 3.514415000  | 0.878143000  | 0.000309000  |
| C         | 2.457786000  | 1.499506000  | 0.000704000  |
| C         | 1.234463000  | 2.185215000  | 0.001326000  |
| C         | 1.203709000  | 3.599415000  | 0.002266000  |
| C         | -0.000001000 | 4.301113000  | 0.002758000  |
| C         | -1.203711000 | 3.599415000  | 0.002267000  |
| C         | -0.000001000 | 1.443884000  | 0.000897000  |
| C         | -1.234464000 | 2.185215000  | 0.001328000  |
| C         | -2.457786000 | 1.499506000  | 0.000708000  |
| C         | -3.514414000 | 0.878141000  | 0.000314000  |
| C         | -4.738013000 | 0.206189000  | -0.000881000 |
| C         | -5.976125000 | 0.906559000  | -0.002741000 |
| C         | -7.175397000 | 0.230570000  | -0.007776000 |
| C         | -4.824667000 | -1.219738000 | -0.004106000 |
| C         | -6.054877000 | -1.852736000 | -0.008834000 |
| C         | 8.522941000  | -1.843008000 | 0.033747000  |
| C         | -8.522952000 | -1.842990000 | 0.033731000  |
| H         | 6.144191000  | -2.934184000 | -0.010679000 |
| H         | 5.979289000  | 1.992320000  | -0.003580000 |
| H         | 8.133951000  | 0.739822000  | -0.008877000 |
| H         | 2.150408000  | 4.134222000  | 0.002591000  |
| H         | -0.000001000 | 5.387512000  | 0.003473000  |
| H         | -2.150410000 | 4.134221000  | 0.002593000  |
| H         | -5.979290000 | 1.992315000  | -0.003589000 |
| H         | -8.133952000 | 0.739813000  | -0.008890000 |
| H         | -6.144184000 | -2.934190000 | -0.010667000 |
| H         | 8.839295000  | -1.953202000 | 1.076792000  |
| H         | 9.260901000  | -1.258490000 | -0.520558000 |
| H         | 8.413586000  | -2.826180000 | -0.429030000 |
| H         | -8.839582000 | -1.952691000 | 1.076744000  |

|   |              |              |              |
|---|--------------|--------------|--------------|
| H | -8.413475000 | -2.826381000 | -0.428547000 |
| H | -9.260765000 | -1.258734000 | -0.521049000 |
| N | 0.000000000  | 0.093379000  | 0.000171000  |
| H | -0.872454000 | -0.422915000 | -0.000549000 |
| H | 0.872454000  | -0.422914000 | -0.000548000 |

**2b**

|    |              |              |              |
|----|--------------|--------------|--------------|
| Br | -3.254567000 | -1.947102000 | -0.003758000 |
| Br | 3.254568000  | -1.947104000 | -0.003759000 |
| N  | -7.208439000 | -0.774983000 | -0.010695000 |
| N  | 7.208439000  | -0.774981000 | -0.010695000 |
| C  | -6.051036000 | -1.494648000 | -0.006408000 |
| C  | -4.819816000 | -0.864529000 | -0.002247000 |
| C  | -4.729411000 | 0.560517000  | -0.000433000 |
| C  | -5.967383000 | 1.263959000  | -0.003208000 |
| C  | -7.167689000 | 0.591241000  | -0.007811000 |
| C  | -3.509083000 | 1.237862000  | 0.000692000  |
| C  | -2.456874000 | 1.866744000  | 0.000993000  |
| C  | -1.234478000 | 2.553393000  | 0.001392000  |
| C  | -1.203735000 | 3.967537000  | 0.001540000  |
| C  | -0.000001000 | 4.669249000  | 0.001675000  |
| C  | 1.203733000  | 3.967537000  | 0.001541000  |
| C  | -0.000001000 | 1.811720000  | 0.001477000  |
| C  | 1.234476000  | 2.553394000  | 0.001393000  |
| C  | 2.456873000  | 1.866744000  | 0.000996000  |
| C  | 3.509082000  | 1.237861000  | 0.000694000  |
| C  | 4.729411000  | 0.560516000  | -0.000432000 |
| C  | 5.967382000  | 1.263959000  | -0.003206000 |
| C  | 7.167688000  | 0.591243000  | -0.007809000 |
| C  | 4.819817000  | -0.864530000 | -0.002247000 |
| C  | 6.051038000  | -1.494647000 | -0.006408000 |
| C  | -8.522629000 | -1.474936000 | 0.030966000  |
| C  | 8.522631000  | -1.474932000 | 0.030963000  |
| H  | -6.147606000 | -2.575350000 | -0.007118000 |
| H  | -5.967619000 | 2.349804000  | -0.004869000 |
| H  | -8.125381000 | 1.102378000  | -0.009705000 |
| H  | -2.150435000 | 4.502352000  | 0.001532000  |
| H  | -0.000001000 | 5.755648000  | 0.001802000  |
| H  | 2.150433000  | 4.502352000  | 0.001534000  |
| H  | 5.967617000  | 2.349805000  | -0.004866000 |
| H  | 8.125380000  | 1.102381000  | -0.009703000 |
| H  | 6.147608000  | -2.575350000 | -0.007119000 |

|   |              |              |              |
|---|--------------|--------------|--------------|
| H | -8.394461000 | -2.496019000 | -0.333748000 |
| H | -9.228480000 | -0.943051000 | -0.611962000 |
| H | -8.892671000 | -1.490285000 | 1.061894000  |
| H | 8.394459000  | -2.496022000 | -0.333728000 |
| H | 8.892686000  | -1.490260000 | 1.061887000  |
| H | 9.228473000  | -0.943059000 | -0.611984000 |
| N | -0.000001000 | 0.461511000  | 0.001623000  |
| H | 0.872883000  | -0.055227000 | 0.001460000  |
| H | -0.872884000 | -0.055228000 | 0.001459000  |

## 2

|   |              |              |              |
|---|--------------|--------------|--------------|
| I | 3.379633000  | -1.849256000 | 0.001452000  |
| I | -3.379633000 | -1.849256000 | -0.001451000 |
| N | 7.385940000  | -0.224081000 | 0.009376000  |
| N | -7.385940000 | -0.224081000 | -0.009377000 |
| C | 6.290990000  | -1.033422000 | 0.005356000  |
| C | 5.004893000  | -0.511543000 | 0.002382000  |
| C | 4.814373000  | 0.903367000  | 0.002345000  |
| C | 5.987204000  | 1.705826000  | 0.005502000  |
| C | 7.240150000  | 1.133282000  | 0.008790000  |
| C | 3.544950000  | 1.501176000  | 0.001624000  |
| C | 2.459301000  | 2.061406000  | 0.001222000  |
| C | 1.220441000  | 2.748247000  | 0.000605000  |
| C | 1.208815000  | 4.166875000  | 0.000623000  |
| C | 0.000000000  | 4.861425000  | 0.000000000  |
| C | -1.208816000 | 4.166875000  | -0.000622000 |
| C | 0.000000000  | 2.042039000  | 0.000000000  |
| C | -1.220442000 | 2.748247000  | -0.000605000 |
| C | -2.459301000 | 2.061406000  | -0.001221000 |
| C | -3.544950000 | 1.501176000  | -0.001624000 |
| C | -4.814374000 | 0.903368000  | -0.002346000 |
| C | -5.987204000 | 1.705826000  | -0.005503000 |
| C | -7.240150000 | 1.133281000  | -0.008791000 |
| C | -5.004894000 | -0.511543000 | -0.002383000 |
| C | -6.290990000 | -1.033422000 | -0.005358000 |
| C | 8.754585000  | -0.813458000 | -0.022019000 |
| C | -8.754584000 | -0.813460000 | 0.022018000  |
| H | 6.482075000  | -2.101516000 | 0.005068000  |
| H | 5.899082000  | 2.788189000  | 0.007767000  |
| H | 8.154489000  | 1.718538000  | 0.011044000  |
| H | 2.153081000  | 4.705459000  | 0.001101000  |
| H | 0.000000000  | 5.948831000  | 0.000001000  |

|   |              |              |              |
|---|--------------|--------------|--------------|
| H | -2.153081000 | 4.705459000  | -0.001101000 |
| H | -5.899083000 | 2.788190000  | -0.007767000 |
| H | -8.154489000 | 1.718538000  | -0.011046000 |
| H | -6.482076000 | -2.101516000 | -0.005069000 |
| H | 9.381952000  | -0.294489000 | 0.707650000  |
| H | 9.173327000  | -0.697872000 | -1.027315000 |
| H | 8.692261000  | -1.872372000 | 0.235029000  |
| H | -9.173314000 | -0.697903000 | 1.027323000  |
| H | -8.692263000 | -1.872366000 | -0.235061000 |
| H | -9.381961000 | -0.294470000 | -0.707628000 |
| H | 0.000000000  | 0.955750000  | 0.000000000  |

**2c**

|   |              |              |              |
|---|--------------|--------------|--------------|
| I | 3.198338000  | -1.817587000 | -0.002676000 |
| I | -3.198337000 | -1.817585000 | -0.002676000 |
| N | 7.276594000  | -0.376462000 | -0.005723000 |
| N | -7.276595000 | -0.376463000 | -0.005726000 |
| C | 6.143287000  | -1.134047000 | -0.003018000 |
| C | 4.887142000  | -0.551340000 | -0.000860000 |
| C | 4.754561000  | 0.871903000  | 0.000061000  |
| C | 5.968046000  | 1.618506000  | -0.001631000 |
| C | 7.190362000  | 0.988107000  | -0.004202000 |
| C | 3.517806000  | 1.520091000  | 0.000329000  |
| C | 2.459237000  | 2.138516000  | 0.000198000  |
| C | 1.234326000  | 2.821174000  | 0.000179000  |
| C | 1.203530000  | 4.235344000  | -0.000099000 |
| C | 0.000000000  | 4.937248000  | -0.000220000 |
| C | -1.203531000 | 4.235344000  | -0.000099000 |
| C | -0.000001000 | 2.079476000  | 0.000401000  |
| C | -1.234327000 | 2.821174000  | 0.000179000  |
| C | -2.459237000 | 2.138517000  | 0.000199000  |
| C | -3.517806000 | 1.520092000  | 0.000329000  |
| C | -4.754562000 | 0.871903000  | 0.000060000  |
| C | -5.968047000 | 1.618506000  | -0.001633000 |
| C | -7.190363000 | 0.988106000  | -0.004205000 |
| C | -4.887142000 | -0.551340000 | -0.000860000 |
| C | -6.143287000 | -1.134048000 | -0.003020000 |
| C | 8.616483000  | -1.025887000 | 0.025153000  |
| C | -8.616482000 | -1.025892000 | 0.025159000  |
| H | 6.284551000  | -2.209848000 | -0.003187000 |
| H | 5.930830000  | 2.703792000  | -0.003143000 |
| H | 8.130547000  | 1.531028000  | -0.005252000 |

|   |              |              |              |
|---|--------------|--------------|--------------|
| H | 2.150288000  | 4.770044000  | -0.000226000 |
| H | 0.000000000  | 6.023652000  | -0.000442000 |
| H | -2.150289000 | 4.770044000  | -0.000226000 |
| H | -5.930833000 | 2.703792000  | -0.003145000 |
| H | -8.130548000 | 1.531027000  | -0.005255000 |
| H | -6.284552000 | -2.209849000 | -0.003189000 |
| H | 9.052961000  | -0.907713000 | 1.022641000  |
| H | 9.258948000  | -0.553574000 | -0.723168000 |
| H | 8.503918000  | -2.086535000 | -0.206659000 |
| H | -9.052916000 | -0.907795000 | 1.022675000  |
| H | -8.503926000 | -2.086522000 | -0.206741000 |
| H | -9.258979000 | -0.553522000 | -0.723097000 |
| N | -0.000001000 | 0.729380000  | 0.000866000  |
| H | -0.872870000 | 0.211111000  | 0.000877000  |
| H | 0.872868000  | 0.211111000  | 0.000877000  |

## 2d

|   |              |              |              |
|---|--------------|--------------|--------------|
| I | -3.350132000 | -1.718580000 | -0.000005000 |
| I | 3.350132000  | -1.718580000 | 0.000000000  |
| N | -7.395267000 | -0.082054000 | 0.000006000  |
| N | 7.395267000  | -0.082054000 | 0.000004000  |
| C | -6.316802000 | -0.945303000 | 0.000002000  |
| C | -5.006665000 | -0.399653000 | 0.000000000  |
| C | -4.799127000 | 0.994211000  | 0.000002000  |
| C | -5.958785000 | 1.834406000  | 0.000005000  |
| C | -7.204665000 | 1.282020000  | 0.000007000  |
| C | -3.527430000 | 1.584083000  | 0.000001000  |
| C | -2.462079000 | 2.188195000  | 0.000000000  |
| C | -1.232550000 | 2.869243000  | -0.000001000 |
| C | -1.203233000 | 4.282792000  | -0.000003000 |
| C | 0.000000000  | 4.985173000  | -0.000004000 |
| C | 1.203233000  | 4.282791000  | -0.000004000 |
| C | 0.000000000  | 2.130512000  | -0.000001000 |
| C | 1.232550000  | 2.869243000  | -0.000003000 |
| C | 2.462079000  | 2.188194000  | -0.000002000 |
| C | 3.527430000  | 1.584082000  | -0.000002000 |
| C | 4.799127000  | 0.994210000  | -0.000001000 |
| C | 5.958784000  | 1.834406000  | 0.000001000  |
| C | 7.204665000  | 1.282020000  | 0.000003000  |
| C | 5.006665000  | -0.399653000 | 0.000001000  |
| C | 6.316802000  | -0.945303000 | 0.000003000  |
| C | -8.776191000 | -0.620743000 | 0.000009000  |



|   |              |              |              |
|---|--------------|--------------|--------------|
| C | 8.776191000  | -0.620742000 | 0.000005000  |
| H | -5.845300000 | 2.913188000  | 0.000006000  |
| H | -8.109571000 | 1.879913000  | 0.000010000  |
| H | -2.150433000 | 4.816680000  | -0.000002000 |
| H | 0.000000000  | 6.071600000  | -0.000005000 |
| H | 2.150434000  | 4.816680000  | -0.000005000 |
| H | 5.845300000  | 2.913188000  | 0.000001000  |
| H | 8.109571000  | 1.879913000  | 0.000004000  |
| H | -8.947040000 | -1.222289000 | -0.900773000 |
| H | -9.474728000 | 0.216825000  | 0.000018000  |
| H | -8.947032000 | -1.222300000 | 0.900786000  |
| H | 8.947037000  | -1.222294000 | -0.900775000 |
| H | 8.947035000  | -1.222295000 | 0.900785000  |
| H | 9.474728000  | 0.216825000  | 0.000007000  |
| N | -0.000001000 | 0.776348000  | -0.000001000 |
| H | 0.873183000  | 0.261569000  | 0.000004000  |
| H | -0.873184000 | 0.261569000  | 0.000005000  |
| N | 6.560352000  | -2.274042000 | 0.000003000  |
| H | 5.778451000  | -2.920486000 | 0.000005000  |
| H | 7.493758000  | -2.661244000 | 0.000011000  |
| N | -6.560350000 | -2.274042000 | 0.000003000  |
| H | -5.778448000 | -2.920485000 | -0.000004000 |
| H | -7.493756000 | -2.661246000 | -0.000007000 |

## 2e

|   |              |              |              |
|---|--------------|--------------|--------------|
| I | -3.210466000 | -1.408715000 | 0.000028000  |
| I | 3.210467000  | -1.408714000 | -0.000004000 |
| N | -7.312851000 | 0.061947000  | -0.000004000 |
| N | 7.312850000  | 0.061946000  | -0.000014000 |
| C | -6.174913000 | -0.690095000 | 0.000007000  |
| C | -4.902094000 | -0.149656000 | 0.000007000  |
| C | -4.763187000 | 1.276576000  | -0.000004000 |
| C | -5.966389000 | 2.038629000  | -0.000016000 |
| C | -7.196830000 | 1.426707000  | -0.000016000 |
| C | -3.520712000 | 1.910805000  | -0.000003000 |
| C | -2.459861000 | 2.526505000  | -0.000004000 |
| C | -1.234960000 | 3.207195000  | -0.000011000 |
| C | -1.203603000 | 4.621868000  | -0.000017000 |
| C | 0.000000000  | 5.323520000  | -0.000023000 |
| C | 1.203603000  | 4.621868000  | -0.000024000 |
| C | 0.000000000  | 2.465132000  | -0.000012000 |
| C | 1.234960000  | 3.207195000  | -0.000019000 |

|   |              |              |              |
|---|--------------|--------------|--------------|
| C | 2.459862000  | 2.526505000  | -0.000020000 |
| C | 3.520713000  | 1.910805000  | -0.000020000 |
| C | 4.763187000  | 1.276576000  | -0.000018000 |
| C | 5.966389000  | 2.038628000  | -0.000023000 |
| C | 7.196830000  | 1.426706000  | -0.000021000 |
| C | 4.902094000  | -0.149656000 | -0.000012000 |
| C | 6.174912000  | -0.690095000 | -0.000010000 |
| C | -8.663077000 | -0.579535000 | 0.000009000  |
| C | 8.663076000  | -0.579536000 | -0.000008000 |
| H | -5.915643000 | 3.123150000  | -0.000026000 |
| H | -8.128082000 | 1.983313000  | -0.000025000 |
| H | -2.150067000 | 5.157073000  | -0.000016000 |
| H | 0.000000000  | 6.409919000  | -0.000027000 |
| H | 2.150067000  | 5.157073000  | -0.000029000 |
| H | 5.915644000  | 3.123149000  | -0.000028000 |
| H | 8.128082000  | 1.983312000  | -0.000024000 |
| H | -8.772091000 | -1.194024000 | -0.898609000 |
| H | -9.412339000 | 0.212613000  | -0.000062000 |
| H | -8.772129000 | -1.193907000 | 0.898702000  |
| H | 8.772105000  | -1.193984000 | -0.898652000 |
| H | 8.772113000  | -1.193949000 | 0.898659000  |
| H | 9.412338000  | 0.212611000  | -0.000027000 |
| N | 0.000000000  | 1.116085000  | -0.000006000 |
| H | 0.872924000  | 0.597802000  | -0.000007000 |
| H | -0.872924000 | 0.597802000  | -0.000001000 |
| N | 6.391620000  | -2.174951000 | -0.000003000 |
| O | 6.473168000  | -2.702762000 | 1.108144000  |
| O | 6.473148000  | -2.702777000 | -1.108142000 |
| N | -6.391622000 | -2.174951000 | 0.000022000  |
| O | -6.473198000 | -2.702751000 | 1.108171000  |
| O | -6.473121000 | -2.702787000 | -1.108116000 |

**2f**

|   |              |              |              |
|---|--------------|--------------|--------------|
| I | 3.094549000  | -1.878369000 | -0.000012000 |
| I | -3.094545000 | -1.878367000 | 0.000003000  |
| N | 7.226860000  | -0.542990000 | 0.000008000  |
| N | -7.226861000 | -0.542994000 | 0.000007000  |
| C | 6.052678000  | -1.265238000 | 0.000000000  |
| C | 4.823215000  | -0.661484000 | -0.000001000 |
| C | 4.738686000  | 0.775800000  | 0.000004000  |
| C | 5.949627000  | 1.486013000  | 0.000006000  |
| C | 7.194615000  | 0.835861000  | 0.000009000  |

|   |              |              |              |
|---|--------------|--------------|--------------|
| C | 3.511046000  | 1.451205000  | 0.000001000  |
| C | 2.458590000  | 2.077148000  | 0.000000000  |
| C | 1.233459000  | 2.764909000  | -0.000003000 |
| C | 1.203567000  | 4.177880000  | -0.000004000 |
| C | 0.000000000  | 4.880199000  | -0.000006000 |
| C | -1.203568000 | 4.177882000  | -0.000008000 |
| C | -0.000003000 | 2.024489000  | -0.000003000 |
| C | -1.233463000 | 2.764911000  | -0.000006000 |
| C | -2.458595000 | 2.077153000  | -0.000006000 |
| C | -3.511050000 | 1.451208000  | -0.000006000 |
| C | -4.738689000 | 0.775801000  | -0.000003000 |
| C | -5.949631000 | 1.486011000  | -0.000002000 |
| C | -7.194618000 | 0.835857000  | 0.000003000  |
| C | -4.823215000 | -0.661484000 | 0.000001000  |
| C | -6.052677000 | -1.265240000 | 0.000006000  |
| C | 8.522586000  | -1.261371000 | 0.000021000  |
| C | -8.522586000 | -1.261377000 | 0.000014000  |
| H | 6.173109000  | -2.342883000 | -0.000004000 |
| H | 5.932001000  | 2.572115000  | 0.000006000  |
| H | 2.150522000  | 4.712271000  | -0.000002000 |
| H | 0.000001000  | 5.966617000  | -0.000006000 |
| H | -2.150523000 | 4.712275000  | -0.000009000 |
| H | -5.932007000 | 2.572114000  | -0.000004000 |
| H | -6.173106000 | -2.342885000 | 0.000009000  |
| H | 9.093802000  | -1.005838000 | 0.900455000  |
| H | 9.093808000  | -1.005865000 | -0.900417000 |
| H | 8.327883000  | -2.334577000 | 0.000034000  |
| H | -8.327880000 | -2.334583000 | 0.000029000  |
| H | -9.093803000 | -1.005871000 | -0.900426000 |
| H | -9.093806000 | -1.005847000 | 0.900445000  |
| N | -0.000004000 | 0.673014000  | 0.000003000  |
| H | -0.872822000 | 0.154851000  | -0.000010000 |
| H | 0.872813000  | 0.154849000  | -0.000008000 |
| N | -8.362708000 | 1.522323000  | 0.000010000  |
| H | -8.346975000 | 2.534635000  | -0.000016000 |
| H | -9.269517000 | 1.076195000  | -0.000026000 |
| N | 8.362703000  | 1.522328000  | 0.000030000  |
| H | 8.346969000  | 2.534640000  | 0.000006000  |
| H | 9.269514000  | 1.076203000  | -0.000048000 |

**2g**

|   |              |              |              |
|---|--------------|--------------|--------------|
| I | -3.295350000 | -2.138718000 | -0.028470000 |
|---|--------------|--------------|--------------|

|   |              |              |              |
|---|--------------|--------------|--------------|
| I | 3.295350000  | -2.138718000 | -0.028460000 |
| N | -7.348821000 | -0.605531000 | -0.006726000 |
| N | 7.348821000  | -0.605531000 | -0.006727000 |
| C | -6.219151000 | -1.377559000 | -0.027762000 |
| C | -4.947767000 | -0.831225000 | -0.015997000 |
| C | -4.776027000 | 0.589512000  | -0.008723000 |
| C | -5.968257000 | 1.364082000  | -0.011090000 |
| C | -7.199603000 | 0.753934000  | 0.007410000  |
| C | -3.527958000 | 1.211395000  | -0.007927000 |
| C | -2.460893000 | 1.816322000  | -0.009216000 |
| C | -1.234812000 | 2.493765000  | -0.010105000 |
| C | -1.203508000 | 3.908761000  | -0.012279000 |
| C | 0.000000000  | 4.610422000  | -0.013454000 |
| C | 1.203508000  | 3.908761000  | -0.012279000 |
| C | 0.000000000  | 1.751058000  | -0.008929000 |
| C | 1.234812000  | 2.493765000  | -0.010105000 |
| C | 2.460893000  | 1.816323000  | -0.009215000 |
| C | 3.527958000  | 1.211395000  | -0.007926000 |
| C | 4.776027000  | 0.589512000  | -0.008722000 |
| C | 5.968257000  | 1.364082000  | -0.011093000 |
| C | 7.199603000  | 0.753934000  | 0.007407000  |
| C | 4.947768000  | -0.831225000 | -0.015993000 |
| C | 6.219151000  | -1.377559000 | -0.027759000 |
| C | -8.685877000 | -1.280153000 | -0.040115000 |
| C | 8.685877000  | -1.280153000 | -0.040116000 |
| H | -6.385775000 | -2.448999000 | -0.060495000 |
| H | -5.922761000 | 2.448670000  | -0.025246000 |
| H | -2.150017000 | 4.443900000  | -0.013425000 |
| H | -0.000001000 | 5.696833000  | -0.015599000 |
| H | 2.150017000  | 4.443901000  | -0.013424000 |
| H | 5.922761000  | 2.448670000  | -0.025251000 |
| H | 6.385775000  | -2.448999000 | -0.060489000 |
| H | -9.320919000 | -0.795899000 | -0.785801000 |
| H | -9.152824000 | -1.211904000 | 0.944835000  |
| H | -8.520433000 | -2.321433000 | -0.320678000 |
| H | 8.520432000  | -2.321434000 | -0.320675000 |
| H | 9.152826000  | -1.211900000 | 0.944833000  |
| H | 9.320917000  | -0.795901000 | -0.785805000 |
| N | 0.000000000  | 0.401997000  | -0.006150000 |
| H | 0.872679000  | -0.116702000 | -0.005145000 |
| H | -0.872679000 | -0.116702000 | -0.005145000 |
| N | 8.422100000  | 1.616292000  | 0.089035000  |

|   |              |             |              |
|---|--------------|-------------|--------------|
| O | 9.269374000  | 1.289517000 | 0.924448000  |
| O | 8.437812000  | 2.591264000 | -0.660745000 |
| N | -8.422100000 | 1.616291000 | 0.089043000  |
| O | -9.269372000 | 1.289514000 | 0.924456000  |
| O | -8.437814000 | 2.591266000 | -0.660735000 |

2h

|   |              |              |              |
|---|--------------|--------------|--------------|
| I | 3.049609000  | -1.948475000 | -0.000003000 |
| I | -3.049609000 | -1.948476000 | -0.000011000 |
| N | 7.163319000  | -0.663718000 | -0.000012000 |
| N | -7.163320000 | -0.663718000 | -0.000010000 |
| C | 6.016788000  | -1.390752000 | -0.000006000 |
| C | 4.785751000  | -0.744420000 | -0.000002000 |
| C | 4.696855000  | 0.667406000  | -0.000001000 |
| C | 5.939557000  | 1.409507000  | -0.000006000 |
| C | 7.144804000  | 0.696509000  | -0.000013000 |
| C | 3.482694000  | 1.363802000  | 0.000000000  |
| C | 2.456122000  | 2.034639000  | 0.000000000  |
| C | 1.234110000  | 2.729900000  | 0.000002000  |
| C | 1.203381000  | 4.142292000  | 0.000004000  |
| C | 0.000000000  | 4.844544000  | 0.000005000  |
| C | -1.203381000 | 4.142292000  | 0.000004000  |
| C | 0.000000000  | 1.989332000  | 0.000001000  |
| C | -1.234110000 | 2.729900000  | 0.000002000  |
| C | -2.456121000 | 2.034639000  | 0.000001000  |
| C | -3.482693000 | 1.363802000  | 0.000001000  |
| C | -4.696855000 | 0.667406000  | 0.000000000  |
| C | -5.939557000 | 1.409508000  | -0.000002000 |
| C | -7.144804000 | 0.696510000  | -0.000008000 |
| C | -4.785751000 | -0.744420000 | -0.000003000 |
| C | -6.016788000 | -1.390752000 | -0.000007000 |
| C | 8.483370000  | -1.354692000 | 0.000060000  |
| C | -8.483370000 | -1.354691000 | 0.000064000  |
| H | 6.118897000  | -2.469195000 | -0.000004000 |
| H | 8.109893000  | 1.193275000  | -0.000017000 |
| H | 2.147798000  | 4.681175000  | 0.000004000  |
| H | 0.000000000  | 5.930911000  | 0.000006000  |
| H | -2.147798000 | 4.681175000  | 0.000005000  |
| H | -8.109892000 | 1.193275000  | -0.000010000 |
| H | -6.118897000 | -2.469195000 | -0.000007000 |
| H | 9.039369000  | -1.065821000 | 0.897315000  |
| H | 9.039804000  | -1.065165000 | -0.896709000 |

|   |              |              |              |
|---|--------------|--------------|--------------|
| H | 8.318930000  | -2.433164000 | -0.000381000 |
| H | -8.318931000 | -2.433164000 | -0.000391000 |
| H | -9.039811000 | -1.065154000 | -0.896697000 |
| H | -9.039363000 | -1.065831000 | 0.897327000  |
| N | 0.000000000  | 0.637609000  | 0.000000000  |
| H | -0.871981000 | 0.118059000  | -0.000002000 |
| H | 0.871982000  | 0.118059000  | -0.000002000 |
| N | -5.924889000 | 2.765900000  | -0.000002000 |
| H | -5.042059000 | 3.261476000  | -0.000006000 |
| H | -6.778491000 | 3.309416000  | -0.000005000 |
| N | 5.924889000  | 2.765900000  | -0.000009000 |
| H | 5.042060000  | 3.261476000  | -0.000013000 |
| H | 6.778491000  | 3.309416000  | -0.000015000 |

**2i**

|   |              |              |              |
|---|--------------|--------------|--------------|
| I | 3.437819000  | -2.324528000 | -0.016713000 |
| I | -3.437825000 | -2.324532000 | -0.016666000 |
| N | 7.454005000  | -0.722139000 | 0.043374000  |
| N | -7.454007000 | -0.722129000 | 0.043368000  |
| C | 6.340650000  | -1.521838000 | 0.018306000  |
| C | 5.069904000  | -0.985542000 | 0.002327000  |
| C | 4.865988000  | 0.440845000  | -0.004105000 |
| C | 6.070300000  | 1.209421000  | 0.028896000  |
| C | 7.320838000  | 0.626055000  | 0.059185000  |
| C | 3.594775000  | 0.998057000  | -0.015683000 |
| C | 2.466653000  | 1.481089000  | -0.021492000 |
| C | 1.234225000  | 2.138760000  | -0.037656000 |
| C | 1.204054000  | 3.555608000  | -0.077726000 |
| C | 0.000001000  | 4.256366000  | -0.098023000 |
| C | -1.204052000 | 3.555609000  | -0.077730000 |
| C | 0.000000000  | 1.396332000  | -0.017518000 |
| C | -1.234224000 | 2.138762000  | -0.037659000 |
| C | -2.466653000 | 1.481090000  | -0.021497000 |
| C | -3.594772000 | 0.998053000  | -0.015691000 |
| C | -4.865986000 | 0.440843000  | -0.004114000 |
| C | -6.070295000 | 1.209424000  | 0.028871000  |
| C | -7.320835000 | 0.626065000  | 0.059163000  |
| C | -5.069906000 | -0.985542000 | 0.002337000  |
| C | -6.340655000 | -1.521833000 | 0.018316000  |
| C | 8.805575000  | -1.352945000 | 0.032736000  |
| C | -8.805579000 | -1.352930000 | 0.032731000  |
| H | 6.523166000  | -2.591726000 | 0.013701000  |

|   |              |              |              |
|---|--------------|--------------|--------------|
| H | 8.220149000  | 1.231590000  | 0.099198000  |
| H | 2.153591000  | 4.085534000  | -0.093618000 |
| H | 0.000002000  | 5.342447000  | -0.129278000 |
| H | -2.153589000 | 4.085536000  | -0.093625000 |
| H | -8.220144000 | 1.231603000  | 0.099167000  |
| H | -6.523175000 | -2.591720000 | 0.013726000  |
| H | 8.853019000  | -2.107448000 | 0.823223000  |
| H | 9.555310000  | -0.581145000 | 0.214860000  |
| H | 8.978126000  | -1.817328000 | -0.943686000 |
| H | -8.853029000 | -2.107424000 | 0.823227000  |
| H | -8.978128000 | -1.817324000 | -0.943686000 |
| H | -9.555312000 | -0.581126000 | 0.214843000  |
| N | -0.000001000 | 0.048933000  | 0.017556000  |
| H | -0.873567000 | -0.468381000 | 0.033194000  |
| H | 0.873565000  | -0.468382000 | 0.033197000  |
| N | -6.052751000 | 2.708461000  | 0.037901000  |
| O | -7.068429000 | 3.267321000  | 0.462808000  |
| O | -5.033359000 | 3.258548000  | -0.386620000 |
| N | 6.052764000  | 2.708459000  | 0.037943000  |
| O | 7.068459000  | 3.267309000  | 0.462821000  |
| O | 5.033360000  | 3.258555000  | -0.386536000 |

2j

|   |              |              |              |
|---|--------------|--------------|--------------|
| I | 2.987190000  | -2.030000000 | -0.004075000 |
| I | -2.987189000 | -2.029998000 | -0.004094000 |
| N | 7.143113000  | -0.829848000 | -0.009447000 |
| N | -7.143114000 | -0.829848000 | -0.009450000 |
| C | 5.961043000  | -1.515458000 | -0.004777000 |
| C | 4.746478000  | -0.859527000 | -0.001345000 |
| C | 4.690453000  | 0.574766000  | 0.000133000  |
| C | 5.955700000  | 1.241485000  | -0.002822000 |
| C | 7.134906000  | 0.539478000  | -0.006607000 |
| C | 3.498571000  | 1.285434000  | 0.001087000  |
| C | 2.444380000  | 1.925867000  | 0.000869000  |
| C | 1.243145000  | 2.615466000  | 0.000923000  |
| C | 1.218678000  | 4.066033000  | 0.000425000  |
| C | 0.000000000  | 4.753601000  | 0.000238000  |
| C | -1.218679000 | 4.066032000  | 0.000445000  |
| C | 0.000000000  | 1.898385000  | 0.001368000  |
| C | -1.243146000 | 2.615466000  | 0.000937000  |
| C | -2.444381000 | 1.925866000  | 0.000889000  |
| C | -3.498572000 | 1.285434000  | 0.001108000  |

|   |              |              |              |
|---|--------------|--------------|--------------|
| C | -4.690454000 | 0.574766000  | 0.000150000  |
| C | -5.955701000 | 1.241485000  | -0.002800000 |
| C | -7.134906000 | 0.539477000  | -0.006594000 |
| C | -4.746479000 | -0.859527000 | -0.001347000 |
| C | -5.961043000 | -1.515458000 | -0.004787000 |
| C | 8.435666000  | -1.562552000 | 0.036975000  |
| C | -8.435663000 | -1.562558000 | 0.036972000  |
| H | 6.036036000  | -2.597943000 | -0.004962000 |
| H | 5.991372000  | 2.326551000  | -0.005303000 |
| H | 8.105164000  | 1.026321000  | -0.008221000 |
| H | -0.000001000 | 5.841773000  | -0.000149000 |
| H | -5.991373000 | 2.326551000  | -0.005271000 |
| H | -8.105164000 | 1.026321000  | -0.008204000 |
| H | -6.036037000 | -2.597943000 | -0.004986000 |
| H | 8.812259000  | -1.578871000 | 1.065783000  |
| H | 9.154836000  | -1.059495000 | -0.614859000 |
| H | 8.279852000  | -2.584127000 | -0.315978000 |
| H | -8.812193000 | -1.578990000 | 1.065801000  |
| H | -8.279871000 | -2.584094000 | -0.316105000 |
| H | -9.154873000 | -1.059429000 | -0.614762000 |
| N | 0.000000000  | 0.550176000  | 0.002250000  |
| H | -0.872923000 | 0.031445000  | 0.002428000  |
| H | 0.872922000  | 0.031445000  | 0.002412000  |
| N | -2.393740000 | 4.739099000  | 0.000158000  |
| H | -2.416978000 | 5.750944000  | 0.000017000  |
| H | -3.275055000 | 4.241997000  | 0.000669000  |
| N | 2.393739000  | 4.739100000  | 0.000123000  |
| H | 2.416977000  | 5.750944000  | -0.000037000 |
| H | 3.275055000  | 4.241997000  | 0.000592000  |

**2k**

|   |              |              |              |
|---|--------------|--------------|--------------|
| I | -3.447639000 | -2.667561000 | -0.072244000 |
| I | 3.447645000  | -2.667565000 | -0.072252000 |
| N | -7.376517000 | -0.859372000 | 0.110348000  |
| N | 7.376516000  | -0.859363000 | 0.110351000  |
| C | -6.326762000 | -1.723799000 | 0.051440000  |
| C | -5.017897000 | -1.263497000 | 0.012971000  |
| C | -4.759179000 | 0.136321000  | 0.033514000  |
| C | -5.885347000 | 1.002569000  | 0.096881000  |
| C | -7.163194000 | 0.490465000  | 0.133902000  |
| C | -3.470302000 | 0.686971000  | 0.000182000  |
| C | -2.450979000 | 1.361812000  | 0.007389000  |



|           |              |              |              |
|-----------|--------------|--------------|--------------|
| C         | -1.244076000 | 2.077469000  | 0.007268000  |
| C         | -1.190746000 | 3.490939000  | -0.004785000 |
| C         | 0.000000000  | 4.203548000  | -0.035069000 |
| C         | 1.190744000  | 3.490936000  | -0.004786000 |
| C         | -0.000004000 | 1.349757000  | -0.015654000 |
| C         | 1.244070000  | 2.077466000  | 0.007267000  |
| C         | 2.450972000  | 1.361806000  | 0.007387000  |
| C         | 3.470296000  | 0.686967000  | 0.000183000  |
| C         | 4.759175000  | 0.136321000  | 0.033518000  |
| C         | 5.885340000  | 1.002573000  | 0.096888000  |
| C         | 7.163188000  | 0.490473000  | 0.133909000  |
| C         | 5.017898000  | -1.263495000 | 0.012971000  |
| C         | 6.326764000  | -1.723793000 | 0.051440000  |
| C         | -8.775932000 | -1.373598000 | 0.137327000  |
| C         | 8.775932000  | -1.373584000 | 0.137337000  |
| H         | -6.572239000 | -2.780579000 | 0.036299000  |
| H         | -5.733606000 | 2.078425000  | 0.121263000  |
| H         | -8.047343000 | 1.118801000  | 0.183667000  |
| H         | 0.000001000  | 5.287567000  | -0.083388000 |
| H         | 5.733595000  | 2.078429000  | 0.121272000  |
| H         | 8.047335000  | 1.118812000  | 0.183676000  |
| H         | 6.572245000  | -2.780572000 | 0.036296000  |
| H         | -8.754415000 | -2.462837000 | 0.198924000  |
| H         | -9.288735000 | -1.063204000 | -0.778650000 |
| H         | -9.288985000 | -0.963812000 | 1.012412000  |
| H         | 8.754420000  | -2.462826000 | 0.198882000  |
| H         | 9.288966000  | -0.963836000 | 1.012452000  |
| H         | 9.288754000  | -1.063144000 | -0.778614000 |
| N         | -0.000005000 | 0.000863000  | -0.052216000 |
| H         | 0.874169000  | -0.514787000 | -0.058998000 |
| H         | -0.874181000 | -0.514785000 | -0.058997000 |
| N         | 2.458490000  | 4.287096000  | -0.006620000 |
| O         | 3.440813000  | 3.790546000  | 0.564664000  |
| O         | 2.423841000  | 5.378695000  | -0.576156000 |
| N         | -2.458490000 | 4.287102000  | -0.006617000 |
| O         | -3.440817000 | 3.790549000  | 0.564658000  |
| O         | -2.423836000 | 5.378707000  | -0.576142000 |
| <b>2I</b> |              |              |              |
| I         | 3.113233000  | -1.981463000 | -0.013512000 |
| I         | -3.113235000 | -1.981464000 | -0.013510000 |
| N         | 7.219862000  | -0.622671000 | 0.014823000  |

|   |              |              |              |
|---|--------------|--------------|--------------|
| N | -7.219861000 | -0.622669000 | 0.014821000  |
| C | 6.069551000  | -1.356703000 | 0.008736000  |
| C | 4.827134000  | -0.748256000 | 0.002538000  |
| C | 4.721284000  | 0.678608000  | 0.004321000  |
| C | 5.951948000  | 1.399342000  | 0.012097000  |
| C | 7.160352000  | 0.744662000  | 0.017595000  |
| C | 3.499001000  | 1.351010000  | -0.002811000 |
| C | 2.451417000  | 1.989137000  | -0.006955000 |
| C | 1.230213000  | 2.677303000  | -0.009215000 |
| C | 1.204450000  | 4.087468000  | -0.009408000 |
| C | -0.000001000 | 4.816403000  | -0.008118000 |
| C | -1.204452000 | 4.087466000  | -0.009409000 |
| C | 0.000001000  | 1.929220000  | -0.009075000 |
| C | -1.230212000 | 2.677301000  | -0.009216000 |
| C | -2.451414000 | 1.989133000  | -0.006956000 |
| C | -3.498999000 | 1.351008000  | -0.002812000 |
| C | -4.721282000 | 0.678607000  | 0.004320000  |
| C | -5.951945000 | 1.399342000  | 0.012093000  |
| C | -7.160350000 | 0.744664000  | 0.017591000  |
| C | -4.827134000 | -0.748257000 | 0.002538000  |
| C | -6.069551000 | -1.356702000 | 0.008735000  |
| C | 8.544226000  | -1.299673000 | 0.059153000  |
| C | -8.544225000 | -1.299672000 | 0.059155000  |
| H | 6.188489000  | -2.435163000 | 0.008408000  |
| H | 5.937367000  | 2.485118000  | 0.011697000  |
| H | 8.111282000  | 1.268335000  | 0.024196000  |
| H | 2.154974000  | 4.616847000  | -0.005082000 |
| H | -2.154977000 | 4.616843000  | -0.005085000 |
| H | -5.937364000 | 2.485118000  | 0.011692000  |
| H | -8.111279000 | 1.268338000  | 0.024190000  |
| H | -6.188491000 | -2.435162000 | 0.008409000  |
| H | 8.962781000  | -1.214384000 | 1.067824000  |
| H | 9.212632000  | -0.824413000 | -0.664153000 |
| H | 8.415672000  | -2.352228000 | -0.200180000 |
| H | -8.962758000 | -1.214420000 | 1.067839000  |
| H | -8.415678000 | -2.352217000 | -0.200222000 |
| H | -9.212647000 | -0.824384000 | -0.664118000 |
| N | 0.000002000  | 0.577574000  | -0.008903000 |
| H | -0.873011000 | 0.059582000  | -0.005938000 |
| H | 0.873016000  | 0.059583000  | -0.005937000 |
| N | -0.000002000 | 6.194998000  | 0.049461000  |
| H | -0.853337000 | 6.694314000  | -0.171089000 |

H 0.853329000 6.694316000 -0.171098000

**2m**

I -3.291031000 -2.343482000 -0.002109000  
I 3.291032000 -2.343483000 -0.002106000  
N -7.334359000 -0.807345000 -0.003890000  
N 7.334359000 -0.807344000 -0.003892000  
C -6.221004000 -1.592051000 -0.002143000  
C -4.949777000 -1.039174000 -0.000558000  
C -4.787077000 0.378991000 0.000250000  
C -5.979506000 1.155813000 -0.000747000  
C -7.217304000 0.554168000 -0.002676000  
C -3.533579000 1.000848000 0.000323000  
C -2.466870000 1.601447000 0.000182000  
C -1.237080000 2.282038000 0.000119000  
C -1.213526000 3.690044000 -0.000092000  
C 0.000000000 4.368462000 -0.000197000  
C 1.213525000 3.690043000 -0.000092000  
C -0.000001000 1.541527000 0.000252000  
C 1.237079000 2.282038000 0.000118000  
C 2.466869000 1.601446000 0.000182000  
C 3.533578000 1.000848000 0.000323000  
C 4.787076000 0.378991000 0.000249000  
C 5.979505000 1.155813000 -0.000749000  
C 7.217303000 0.554169000 -0.002678000  
C 4.949777000 -1.039174000 -0.000558000  
C 6.221004000 -1.592051000 -0.002143000  
C -8.691385000 -1.423407000 0.018721000  
C 8.691386000 -1.423405000 0.018718000  
H -6.387987000 -2.664165000 -0.002421000  
H -5.916089000 2.239996000 -0.001689000  
H -8.144556000 1.119041000 -0.003308000  
H -2.140652000 4.255318000 -0.000182000  
H 2.140652000 4.255317000 -0.000183000  
H 5.916088000 2.239996000 -0.001691000  
H 8.144555000 1.119042000 -0.003312000  
H 6.387988000 -2.664164000 -0.002420000  
H -8.598010000 -2.497322000 -0.151587000  
H -9.298631000 -0.976640000 -0.773681000  
H -9.153176000 -1.240401000 0.994536000  
H 8.598010000 -2.497322000 -0.151581000  
H 9.153181000 -1.240391000 0.994530000

|   |              |              |              |
|---|--------------|--------------|--------------|
| H | 9.298628000  | -0.976643000 | -0.773690000 |
| N | -0.000001000 | 0.193944000  | 0.000541000  |
| H | 0.873140000  | -0.324643000 | 0.000544000  |
| H | -0.873142000 | -0.324643000 | 0.000545000  |
| N | 0.000000000  | 5.860832000  | -0.000427000 |
| O | -1.102620000 | 6.421354000  | -0.000512000 |
| O | 1.102622000  | 6.421353000  | -0.000512000 |
