# Supplementary figures and images for: Anion recognition using enhanced halogen bonding through intramolecular hydrogen bonds – a computational insight
Source: Royal Society of Chemistry journal article supplement (doi:10.1039/d2nj05969j), 2023-01-01

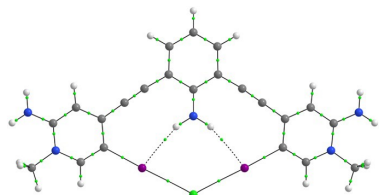

2f...Cl<sup>-</sup>

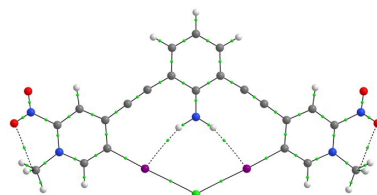

2g...Cl<sup>-</sup>

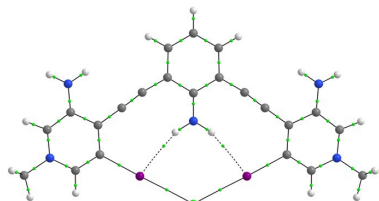

2h...Cl<sup>-</sup>

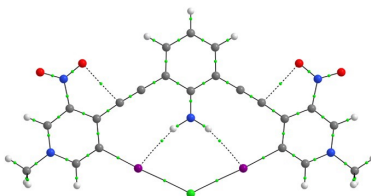

2i...Cl<sup>-</sup>

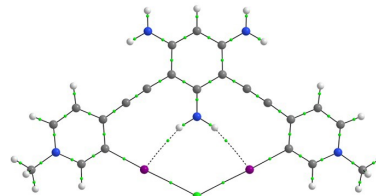

2j...Cl<sup>-</sup>

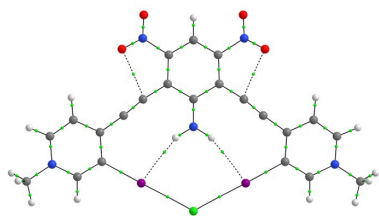

2k...Cl<sup>-</sup>

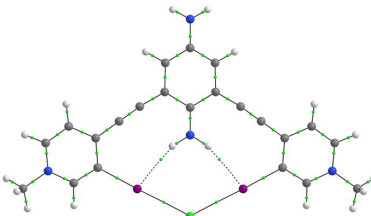

2l...Cl<sup>-</sup>

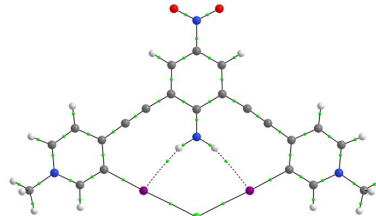

2m...Cl<sup>-</sup>

Supplement: d2nj05969j10.pdf [file d2nj05969j10.pdf]

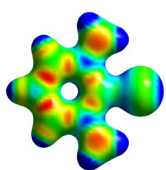

1b

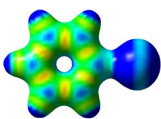

1\_

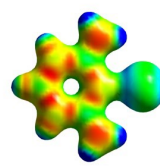

1c

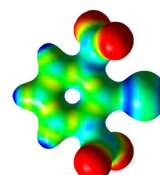

1d

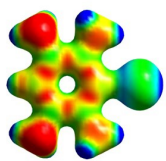

1e

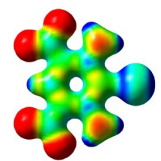

1f

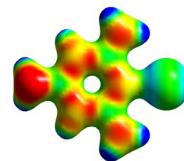

1g

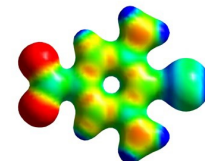

1h

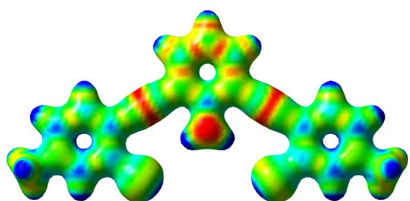

2b

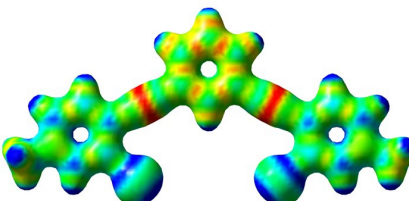

2\_

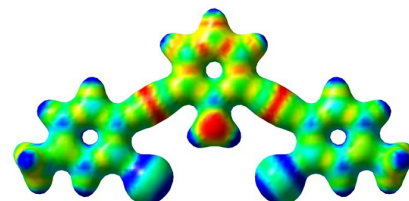

2c

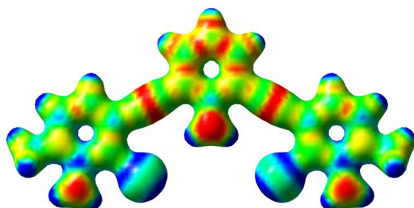

2d

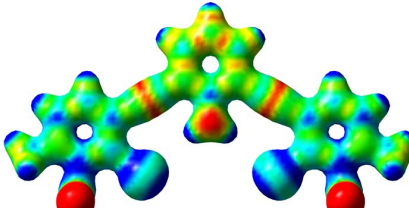

2e

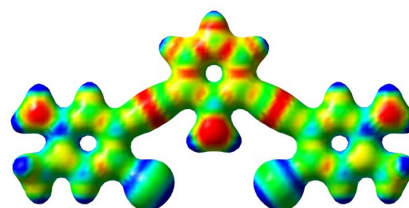

2f

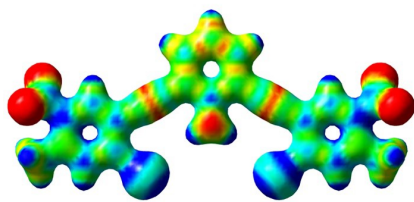

2g

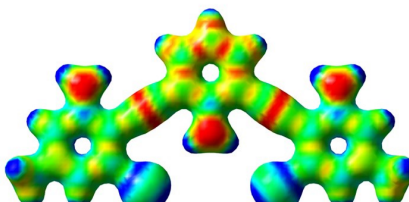

2h

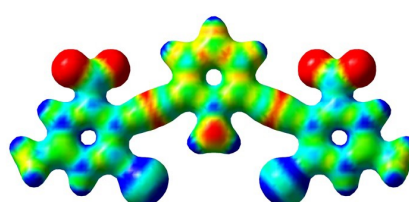

2i

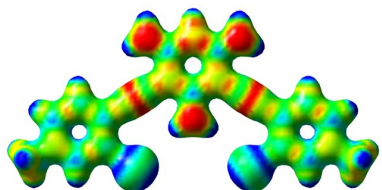

2j

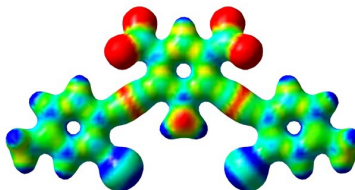

2k

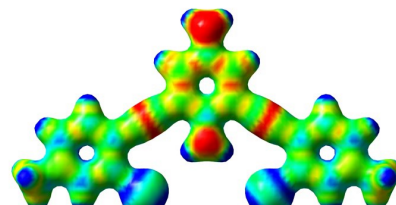

2l

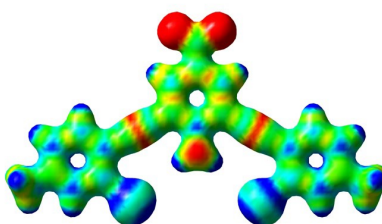

2m

Supplement: d2nj05969j2.pdf [file d2nj05969j2.pdf]

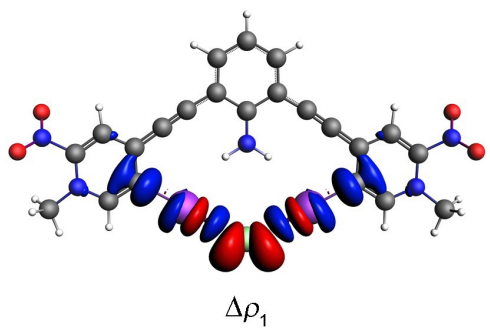

**2g...Cl<sup>-</sup>**

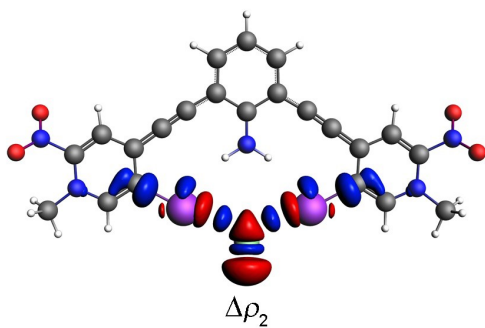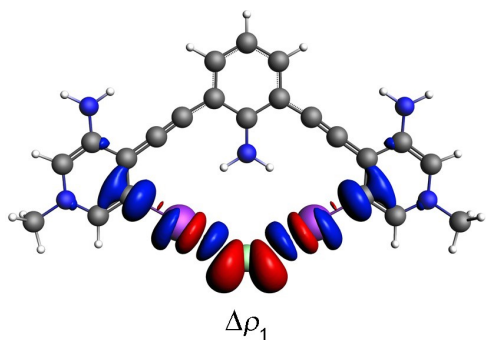

**2h...Cl<sup>-</sup>**

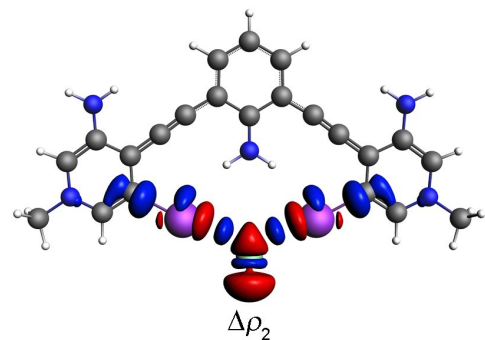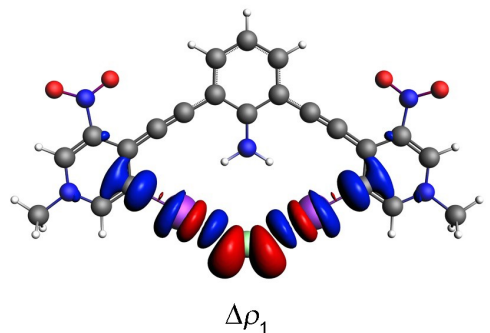

**2i...Cl<sup>-</sup>**

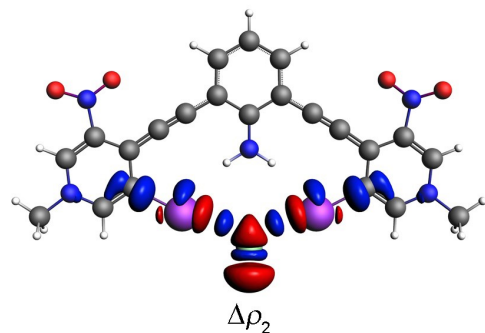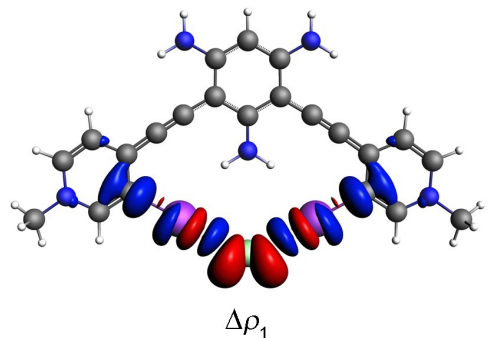

**2j...Cl<sup>-</sup>**

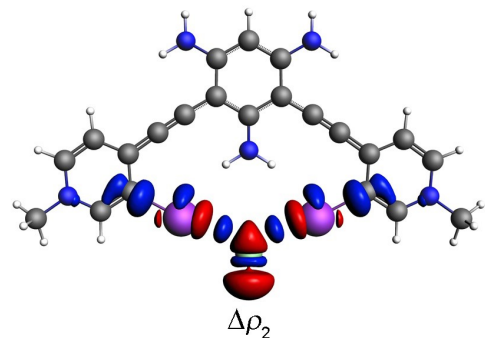

Supplement: d2nj05969j6.pdf [file d2nj05969j6.pdf]

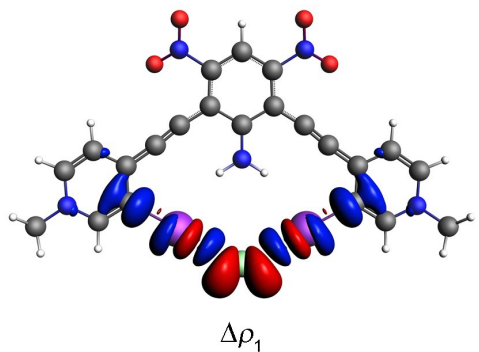

**2k...Cl<sup>-</sup>**

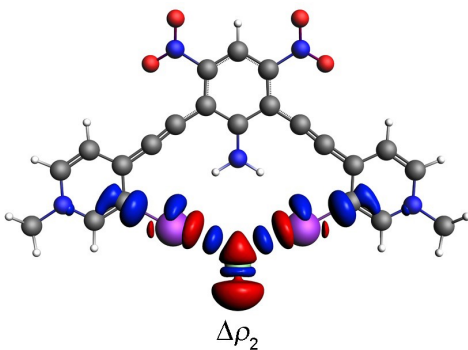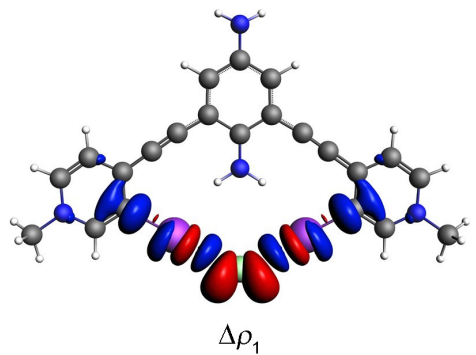

**2l...Cl<sup>-</sup>**

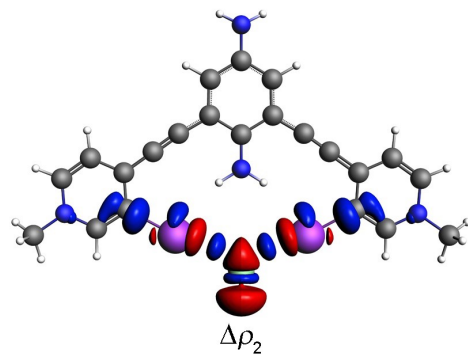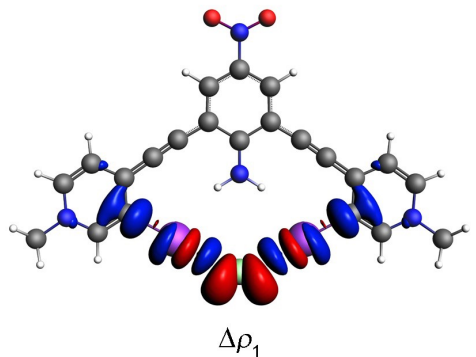

**2m...Cl<sup>-</sup>**

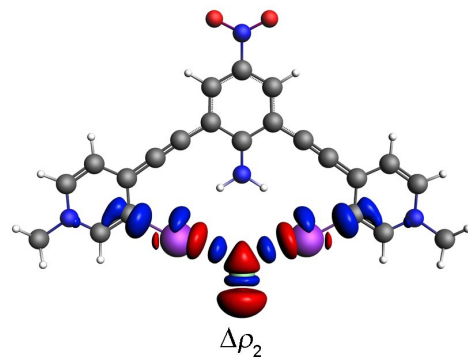

Supplement: d2nj05969j7.pdf [file d2nj05969j7.pdf]

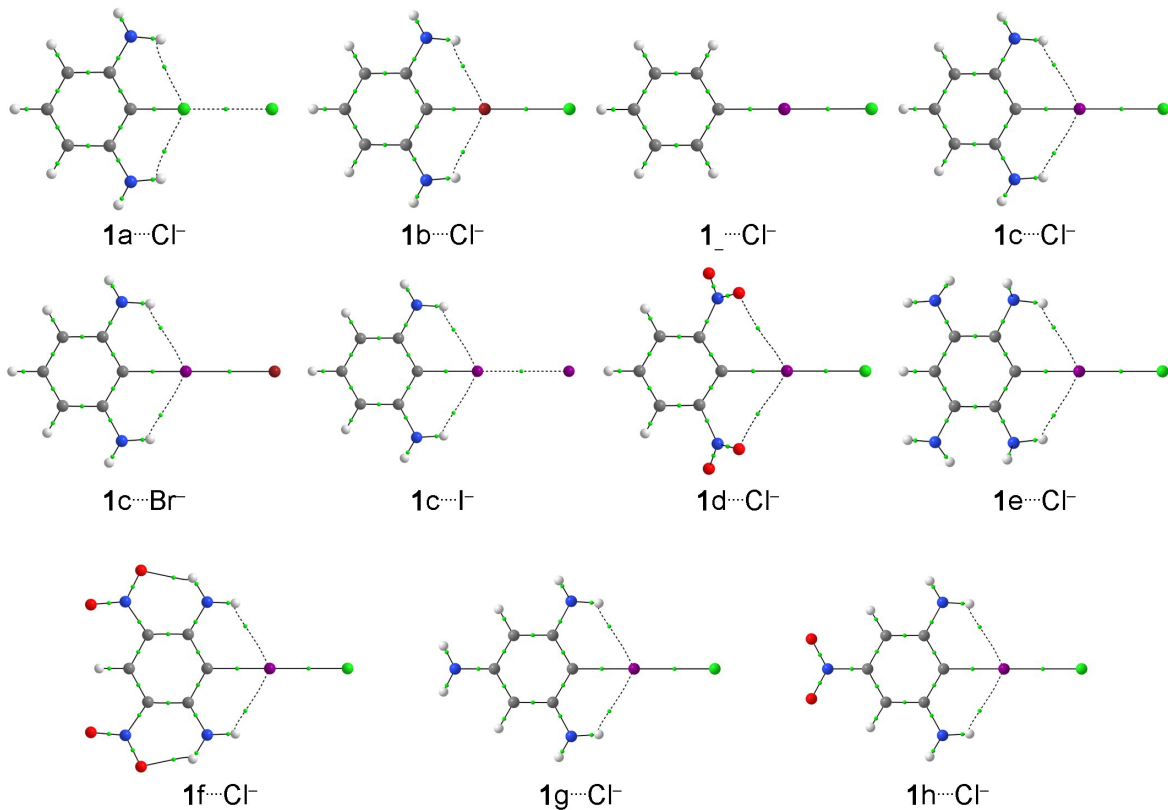

Supplement: d2nj05969j8.pdf [file d2nj05969j8.pdf]

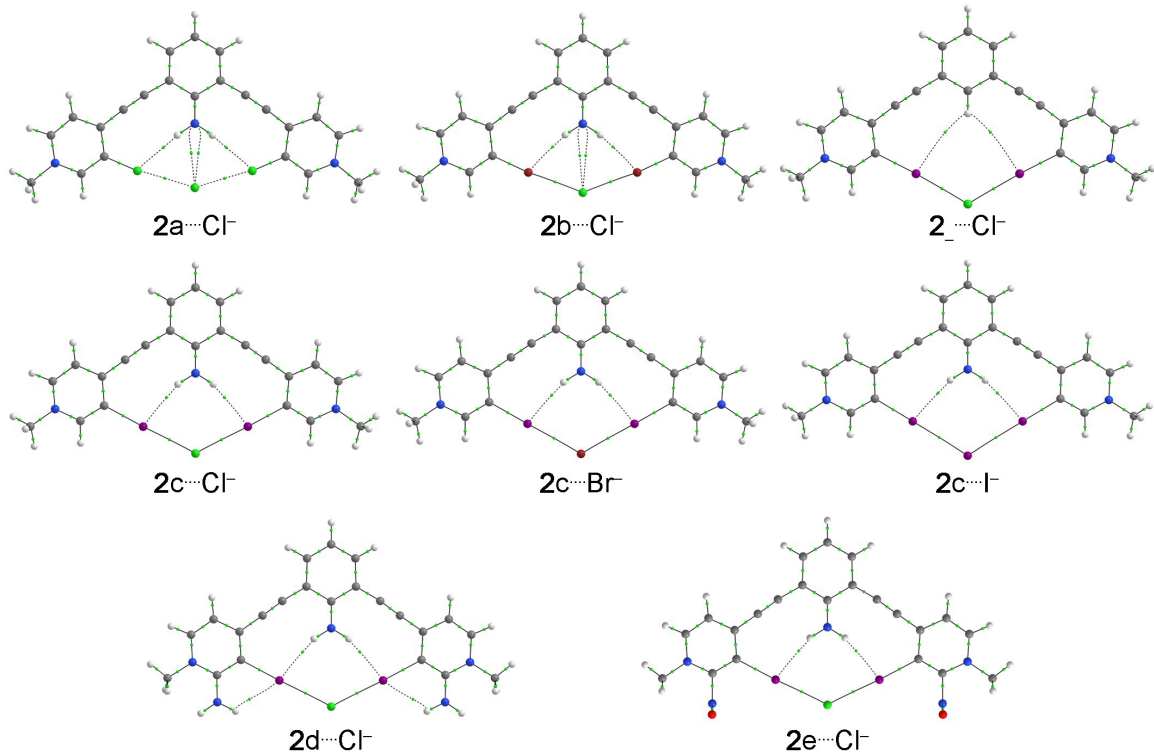

Supplement: d2nj05969j9.pdf [file d2nj05969j9.pdf]
